# Supplementary material for: Characterizing early drug resistance-related events using geometric ensembles from HIV protease dynamics
Source: PubMed Central journal article supplement (PMC6298995; doi:10.1038/s41598-018-36041-8), 2018-12-18
Supplement: 41598_2018_36041_MOESM2_ESM.pdf [file 41598_2018_36041_MOESM2_ESM.pdf]

# Characterizing early drug resistance-related events using geometric ensembles from HIV protease dynamics

Olivier Sheik Amamuddy<sup>1</sup>, Nigel T. Bishop<sup>2</sup> and Özlem Tastan Bishop<sup>1\*</sup>

<sup>1</sup> Research Unit in Bioinformatics (RUBi), Department of Biochemistry and Microbiology, Rhodes University, Grahamstown 6140, South Africa.

<sup>2</sup> Department of Mathematics (Pure & Applied), Rhodes University, Grahamstown 6140, South Africa.

\* o.tastanbishop@ru.ac.za

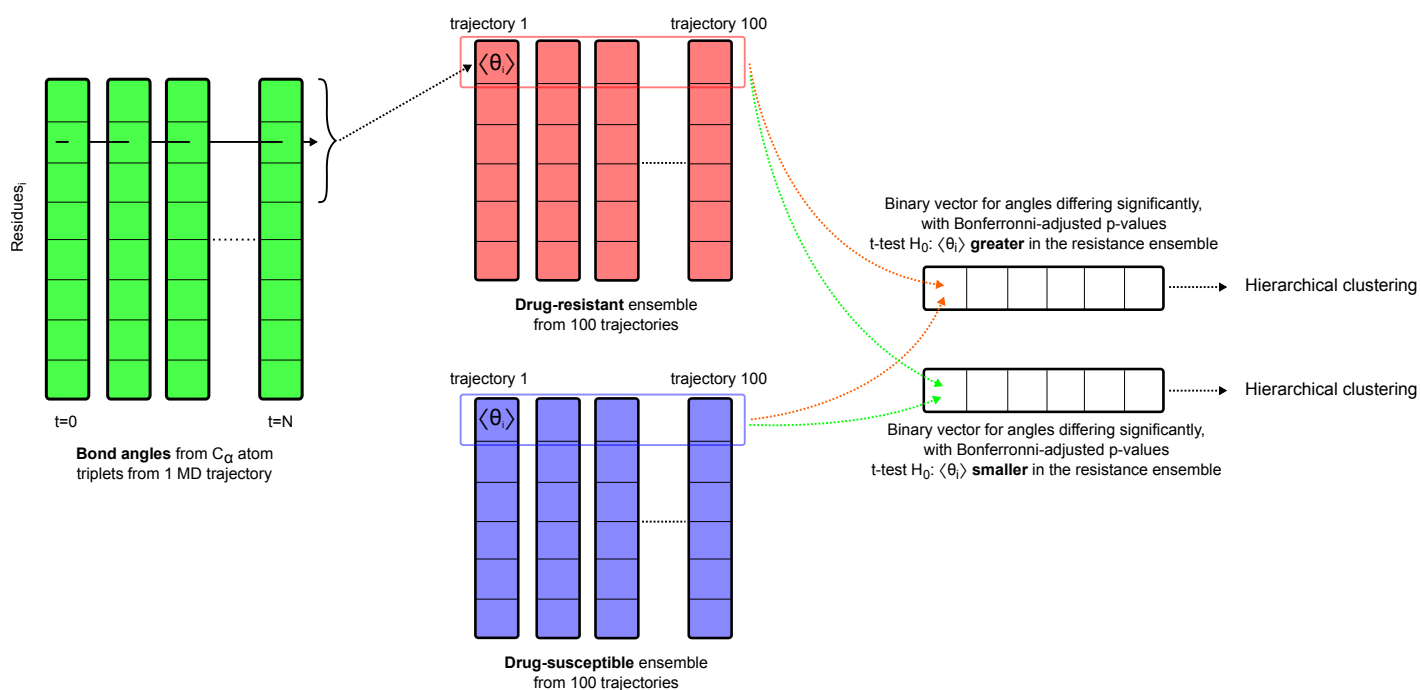

**Supplementary Figure 1:** Experimental layout for evaluating t-tests from  $C_\alpha$  angles for residue triplets from MD trajectories prior to hierarchical clustering.

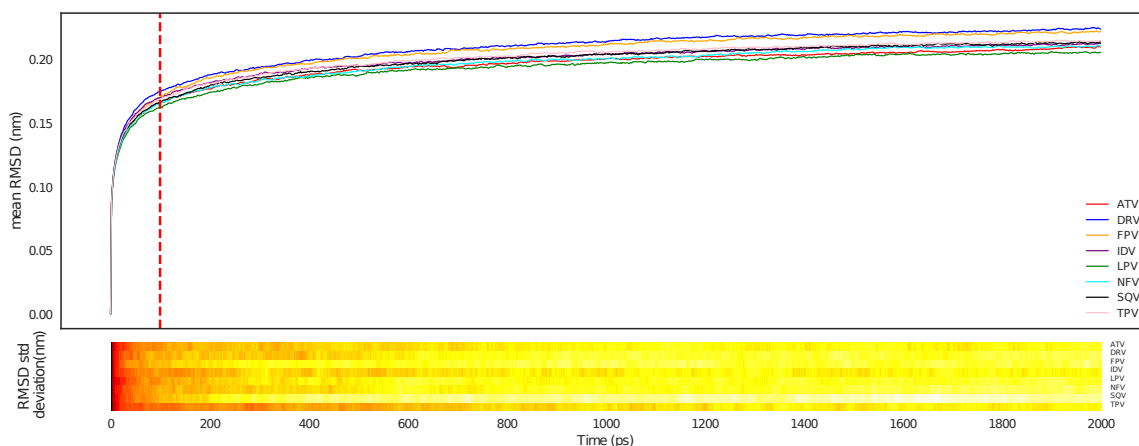

**Supplementary Figure S2:** Mean C $\alpha$  RMSD values obtained across 200 complexes over the duration of the MD simulations for each of ATV, DRV, FPV, IDV, LPV, NFV, SQV and TPV. The red dotted line depicts the 100ps region beyond which the MD runs stabilize. At the bottom, the heat map shows the standard deviations of the RMSD values for the same drugs, with higher values colored red, through yellow and white, which represent lower values.

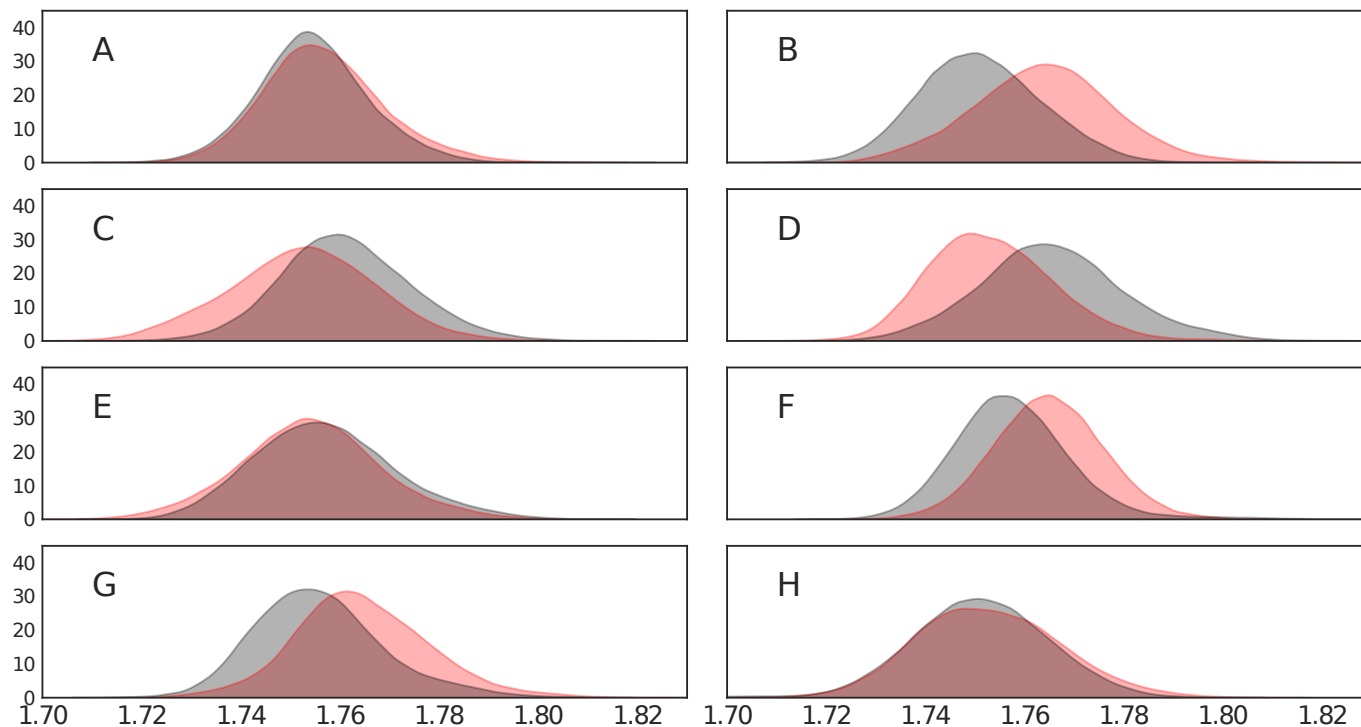

**Supplementary Figure S3:** Density distributions for the radii of gyration for each HIV protease drug resistance ensemble for (A) ATV, (B) DRV, (C) FPV, (D) IDV, (E) NFV, (F) NFV, (G) SQV and (H) TPV, obtained from the replicate molecular dynamics simulations. Drug resistance ensembles are shaded in red while the susceptible ones are in grey.

**Supplementary Table S4: Mutations present in each drug resistance ensemble (according to the 2017 update)****ATV**

4S, **10IVF**, 11LI, 12I, 13VM, 14R, 15V, 16A, 19IV, 20RIVTM, 21D, 22V, 24IM, **32I**, **33FV**, **34QF**, 35DNG, 36IV, 37DS, 41K, 43IT, **46LI**, 47V, **48QV**, 51A, **53L**, **54LVM**, 55RN, 57K, 58E, **60E**, 61HDN, **62V**, 63P, **64VM**, 66V, 67YFE, 69RYQ, 70E, **71IV**, 72LTVMF, **73STA**, 74PS, 75I, 76V, 77I, 79SA, 82LSTA, 83D, **84VA**, 89V, **90M**, 91S, 92K, **93LM**, 95F, 96S

**DRV**

10IFV, **11LI**, 12KPA, 13V, 14R, 15V, 16A, 19QV, 20RTVM, 24M, 30N, **32I**, **33F**, 34Q, 35DG, 36IVT, 37QDT, 43IQT, 46LI, **47V**, 51A, 53L, **54LM**, 55RN, 57KG, 58E, 60E, 62V, 63P, 64VM, 66V, 67WY, 69Q, 71IV, 72LVM, 73STA, 77IT, 79S, 82LA, **84V**, 85L, 88D, **89V**, 90M, 91S, 92K, 93L

**FPV**

**10IVF**, 11I, 12KDPV, 13V, 14RT, 15V, 16A, 19QTI, 20RITVM, 24M, 30N, **32I**, 33F, 35KDNG, 36LI, 37HDQTP, 41K, 43IT, **46LI**, **47V**, 48Q, 53L, **54LVM**, 55RN, 57KG, 58E, 60E, 61DN, 62V, 63P, 64LV, 66FV, 67YGFE, 68E, 69KIQ, 70TE, 71LIVT, 72LTM, **73ST**, 74PS, **76V**, 77IT, 79SA, **82LTA**, **84VA**, 87G, 88D, 89VM, **90M**, 91S, 92KR, 93L, 95F

**IDV**

4A, 7R, **10IFV**, 11I, 12KP, 13VM, 15V, 19QIPT, **20RIT**, 21D, 22V, 24M, **32I**, 33IF, 34TQ, 35DNG, **36LI**, 37SDE, 41K, 43TE, **46LI**, 47V, 48LVM, 50V, 53LY, **54TVSACM**, 57K, 58E, 60NE, 61HNE, 62V, 63P, 64VM, 66VF, 67FE, 68E, 69RYQ, **71TV**, 72LTV, **73CSTA**, 74DS, 75I, **76V**, **77I**, **82SFTA**, 83D, **84VA**, 85V, 89V, **90M**, 92K, 93L

**LPV**

**10IFV**, 11LI, 12KP, 13V, 14R, 15V, 16A, 19IPQV, **20RTVM**, **24I**, 30N, **32I**, **33FV**, 34TQ, 35DAG, 36I, 37EDQTS, 41K, 43QITE, 45R, **46LI**, **47VA**, 48V, **50V**, 51A, **53L**, **54LTVMS**, 55RN, 57K, 58E, 60E, 61HE, 62V, **63P**, 64VM, 65D, 66VF, 67Y, 68E, 69Y, 70E, **71IVT**, 72TVM, **73CSTA**, 74PAS, 75I, **76V**, 77IT, 79S, **82SFTAI**, **84V**, 85LV, 87G, 88D, 89TV, **90M**, 91S, 92K, 93L, 95F

**NFV**

7R, **10IVF**, 11LI, 12IA, 13V, 15V, 16E, 18H, 19I, 20RIVT, 21D, 22V, 24M, **30N**, 33IVFM, 35DNG, **36I**, 37DSTE, 38F, 41K, 43TN, 45R, **46LI**, 48M, 53L, 54VM, 55R, 57K, 58E, 60E, 61HNE, 62V, 63PT, 64V, 65D, 66VF, 67W, 68E, 69R, **71TVI**, 72LTV, 73STA, **77I**, **82FA**, 83D, **84VA**, 85V, **88D**, **90M**, 93L

**SQV**

**10IF**, 11LI, 12IP, 13VM, 15V, 18H, 19I, 20RIVT, 21D, 22V, 24M, 32I, 33IVF, 34D, 35DNG, 36IV, 37DS, 41K, 43T, 46LI, **48QV**, 53L, **54LVM**, 55R, 57K, 58E, 60E, 61HN, **62V**, 63PE, 64V, 66FV, 67WFE, 69Q, **71TVI**, 72LTVM, **73ST**, 74SP, 75I, 76V, **77I**, 79A, **82A**, 83D, **84VA**, 85V, 89V, **90M**, 91S, 92K, 93LM, 95V

**TPV**

**10IV**, 11LI, 12K, 13V, 14R, 15V, 16A, 19V, 20RTV, 21D, 22V, 24IM, 32I, **33F**, 34QDF, 35DG, **36IV**, 37D, **43T**, 45R, **46LI**, **47V**, 53L, **54LVM**, 55R, 57K, **58E**, 60E, 61HN, 62V, 63P, 64V, 66V, 70T, 71IVM, 72TVM, 73ST, **74P**, 77I, **82LTA**, **83D**, **84V**, 85L, 87G, **89VM**, 90M, 91S, 93LM

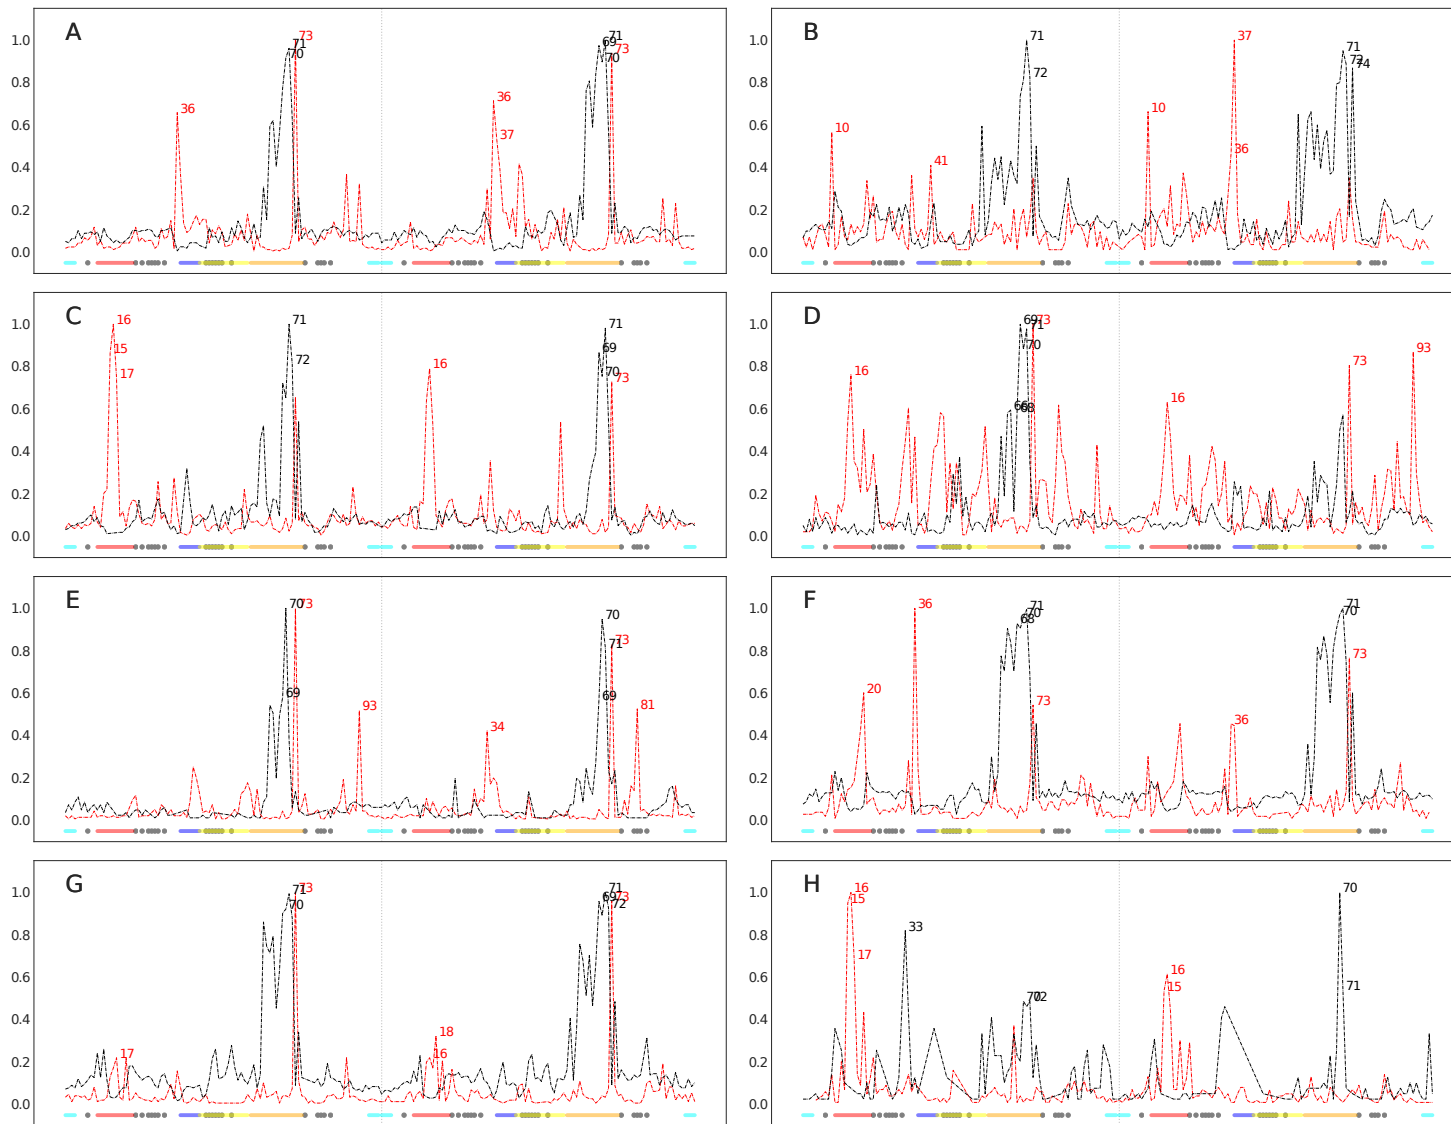

**Supplementary Figure S5:** Normalized degree centralities for replicate molecular dynamics simulations showing significantly larger (red lines) and smaller (black lines) distances observed in resistant ensembles for 8 FDA-approved protease inhibitor complexes, namely ATV (A), DRV (B), FPV (C), IDV (D), LPV (E), NFV (F), SQV (G) and TPV (H). The top 5 residue positions with the highest connectivities are labelled at the peaks in each graph. Inserted underneath are the functional protease residues depicted as colored dots, namely the fulcrum (red), the elbow (blue), the flap (yellow), the cantilever (orange), the interface (cyan) and the binding cavity residues (grey).

**Supplementary dataset S6:** HIV protease sequences used for the ensembles. Sequence headers consist of the sequence IDs and the fold resistance scores. An additional number is appended after an underscore as an internal representation of the mutant after sequence expansion.

**Sequences for the ATV-resistant ensemble**

>105312\_1 700.0  
PQITLWQRPVLTVKIGGQLKEALLDTGADDTVFEEMDLPGKWKPKLIGGIGGFVVRVRYEDIPIEICGYKVTSP  
VLIGPTPTNVIGRNVMTKIGCTLNF

>105312\_3 700.0  
PQITLWQRPVLTVKIGGQLKEALLDTGADDTVFEEDLPGKWKPKLIGGIGGFVVRVRYEDIPIEICGYKVTSP  
VLIGPTPTNVIGRNVMTKIGCTLNF

>105312\_5 700.0  
PQITLWQRPVLTVRIGGQLKEALLDTGADDTVFEEMDLPGKWKPKLIGGIGGFVVRVRYEDIPIEICGYKVTSP  
VLIGPTPTNVIGRNVMTKIGCTLNF

>105312\_7 700.0  
PQITLWQRPVLTVRIGGQLKEALLDTGADDTVFEEDLPGKWKPKLIGGIGGFVVRVRYEDIPIEICGYKVTSP  
VLIGPTPTNVIGRNVMTKIGCTLNF

>117039\_2 700.0  
PQITLWQRPVITVKIGGQLVEALMDTGADDTIFEGINLPGRWPKPKMIGGIGGFVVRVRYEQIPIEICGHKILSTVL  
VGSTPVNVIGRNVMSKIGCTLNF

>117075\_0 700.0  
PQITLWQRPVITVKIGGQLVEALMDTGADDTIFEGINLPGRWPKPKMIGGIGGFVVRVRYEQIPIEICGHKILSTVL  
VGSTPLNVIGRNVMSKIGCTLNF

>117075\_11 700.0  
PQITLWQRPVITVKVGGQLVEALMDTGADDTIFEGINLPGRWPKPKMIGGIGGFVVRVRYEQIPIEICGHKILSTV  
LVGSTPLNVIGRNVMSKIGCTLNF

>105312\_4 700.0  
PQITLWQRPVLTVRIGGQLKEALLDTGADDTVFEEMDLPGKWKPKLIGGIGGFVVRVRYEDIPIEICGHKVTSP  
VLIGPTPTNVIGRNVMTKIGCTLNF

>105312\_6 700.0  
PQITLWQRPVLTVRIGGQLKEALLDTGADDTVFEEDLPGKWKPKLIGGIGGFVVRVRYEDIPIEICGHKVTSP  
VLIGPTPTNVIGRNVMTKIGCTLNF

>115755\_0 700.0  
PQITLWQRPVITIKVGGQIMEALIDTGADDTVLEDINLPGRWPKPKMIQGIGGLVKVRQYDQIPIEICGHEVMSTV  
LVGPTPANIIGRNLTLQIGCTLNF

>115755\_1 700.0  
PQITLWQRPVITIKVGGQIMEALIDTGADDTVLEDINLPGRWPKPKMIQGIGGLVKVRQYDQIPIEICGHEVMSTV  
LVGPTPANIIGRNLTLQMGCTLNF

>115755\_2 700.0  
PQITLWQRPVITIKVGGQIMEALIDTGADDTVLEDINLPGRWPKPKMIQGIGGLVKVRQYDQIPIEICGHEVMSTIL  
VGPTPANIIGRNLTLQIGCTLNF

>115755\_3 700.0  
PQITLWQRPVITIKVGGQIMEALIDTGADDTVLEDINLPGRWPKPKMIQGIGGLVKVRQYDQIPIEICGHEVMSTIL  
VGPTPANIIGRNLTLQMGCTLNF

>143473\_17 700.0  
PQITLWQRPVIVKIGGQLREALLDTGADDTVFEDIDLPGRWTPKLIIGGIGGFVVRVRYDQVPIEICGHKITSTV  
LVGPTPANIIGRNLMTQLGCTLNF

>143473\_19 700.0  
PQITLWQRPVIVKIGGQLREALLDTGADDTVFEDIDLPGRWTPKLIIGGIGGFVVRVRYDQVPIEICGHKVTSTV  
LVGPTPANIIGRNLMTQLGCTLNF

>143473\_21 700.0  
PQITLWQRPVIVKIGGQLREALLDTGADDTVFEDIDLPGRWTPKLIIGGIGGFVVRVRYDQVPIEICGHKITSTV  
LVGPTPANIIGRNLMTQLGCTLNF

>143473\_23 700.0  
PQITLWQRPVIVKIGGQLREALLDTGADDTVFEDIDLPGRWTPKLIIGGIGGFVVRVRYDQVPIEICGHKVTSTV  
LVGPTPANIIGRNLMTQLGCTLNF

>143473\_27 700.0  
PQITLWQRPVIVKIGGQIREALLDTGADDTVFEDIDLPGRWTPKLIIGGIGGFVVRVRYDQVPIEICGHKVTSTV  
LVGPTPANIIGRNLMTQLGCTLNF

>98601\_0 700.0  
PQITLWQRPVITIKIGGQLIEALLDTGADDTVLEEMNLPGRWPKPKIIGGIGGFVVRVRYDQIPIEICGHKVITTVL  
IGPTPVNAIGRNLTLQIGCTLNF

>98604\_0 700.0

PQITLWQRPFVTIKIGGQLIEALLDTGADDTVLEEMNLPGRWPKKIIGGIGGFVKVRQYDQIPIEICGHKVISTVL  
VGPTPVNAIGRNLLTQIGCTLNF  
>98604\_1 700.0  
PQITLWQRPFVTIKIGGQLIEALLDTGADDTVLEEINLPGRWPKKIIGGIGGFVKVRQYDQIPIEICGHKVISTVLV  
GPTPVNAIGRNLLTQIGCTLNF  
>123049\_0 700.0  
PQITLWQRPIITIKIGGQLKDVLMMDTGADDTVLEDIDLPGRWKPKLIGGIGGFVKVRQYDHPVPEVCGHKVTTT  
VLVGPTPVDVIGRNLLTQIGCTLNF  
>123049\_1 700.0  
PQITLWQRPIITIKIGGQLKDVLMMDTGADDTVLEDIDLPGRWKPKLIGGIGGFVKVRQYDNVPVEVCGHKVTTT  
VLVGPTPVDVIGRNLLTQIGCTLNF  
>123049\_2 700.0  
PQITLWQRPIITIKIGGQLKDVLMMDTGADDTVLEDIDLPGRWKPKLIGGIGGFVKVQYDHPVPEVCGHKVTTT  
VLVGPTPVDVIGRNLLTQIGCTLNF  
>123049\_3 700.0  
PQITLWQRPIITIKIGGQLKDVLMMDTGADDTVLEDIDLPGRWKPKLIGGIGGFVKVQYDNVPVEVCGHKVTTT  
VLVGPTPVDVIGRNLLTQIGCTLNF  
>123049\_4 700.0  
PQITLWQRPIITIKIGGQLKDVLMMDTGADDTVLEDIDLPGKWKPKLIGGIGGFVKVRQYDHPVPEVCGHKVTTT  
VLVGPTPVDVIGRNLLTQIGCTLNF  
>123049\_5 700.0  
PQITLWQRPIITIKIGGQLKDVLMMDTGADDTVLEDIDLPGKWKPKLIGGIGGFVKVRQYDNVPVEVCGHKVTTT  
VLVGPTPVDVIGRNLLTQIGCTLNF  
>123049\_6 700.0  
PQITLWQRPIITIKIGGQLKDVLMMDTGADDTVLEDIDLPGKWKPKLIGGIGGFVKVQYDHPVPEVCGHKVTTT  
VLVGPTPVDVIGRNLLTQIGCTLNF  
>123049\_7 700.0  
PQITLWQRPIITIKIGGQLKDVLMMDTGADDTVLEDIDLPGKWKPKLIGGIGGFVKVQYDNVPVEVCGHKVTTT  
VLVGPTPVDVIGRNLLTQIGCTLNF  
>123049\_8 700.0  
PQITLWQRPIITIKIGGQLKDVLMMDTGADDTVLEENIDLPGRWKPKLIGGIGGFVKVRQYDHPVPEVCGHKVTTT  
VLVGPTPVDVIGRNLLTQIGCTLNF  
>123049\_9 700.0  
PQITLWQRPIITIKIGGQLKDVLMMDTGADDTVLEENIDLPGRWKPKLIGGIGGFVKVRQYDNVPVEVCGHKVTTT  
VLVGPTPVDVIGRNLLTQIGCTLNF  
>123049\_10 700.0  
PQITLWQRPIITIKIGGQLKDVLMMDTGADDTVLEENIDLPGRWKPKLIGGIGGFVKVQYDHPVPEVCGHKVTTT  
VLVGPTPVDVIGRNLLTQIGCTLNF  
>123049\_11 700.0  
PQITLWQRPIITIKIGGQLKDVLMMDTGADDTVLEENIDLPGRWKPKLIGGIGGFVKVQYDNVPVEVCGHKVTTT  
VLVGPTPVDVIGRNLLTQIGCTLNF  
>123049\_12 700.0  
PQITLWQRPIITIKIGGQLKDVLMMDTGADDTVLEENIDLPGKWKPKLIGGIGGFVKVRQYDHPVPEVCGHKVTTT  
VLVGPTPVDVIGRNLLTQIGCTLNF  
>123049\_13 700.0  
PQITLWQRPIITIKIGGQLKDVLMMDTGADDTVLEENIDLPGKWKPKLIGGIGGFVKVRQYDNVPVEVCGHKVTTT  
VLVGPTPVDVIGRNLLTQIGCTLNF  
>123049\_15 700.0  
PQITLWQRPIITIKIGGQLKDVLMMDTGADDTVLEENIDLPGKWKPKLIGGIGGFVKVQYDNVPVEVCGHKVTTT  
VLVGPTPVDVIGRNLLTQIGCTLNF  
>107987\_0 700.0  
PQISLWQRPLITVKIGGQVIEALLDTGADDTVVEDINLPGRWPKKIIGGIGGFVRVKQYDQIPVEIFGRKIFTTVL  
VGATPVNVIGRNLMQLGCSLNF  
>107987\_1 700.0  
PQISLWQRPLITVKIGGQVIEALLDTGADDTVVEDINLPGRWPKKIIGGIGGFVRVKQYDQIPVEIFGRKIFTTVL  
VGATPLNVIGRNLMQLGCSLNF  
>107987\_2 700.0  
PQISLWQRPLITVKIGGQVIEALLDTGADDTVVEDINLPGRWPKLIGGIGGFVRVKQYDQIPVEIFGRKIFTTVL  
VGATPVNVIGRNLMQLGCSLNF  
>107987\_3 700.0  
PQISLWQRPLITVKIGGQVIEALLDTGADDTVVEDINLPGRWPKLIGGIGGFVRVKQYDQIPVEIFGRKIFTTVL  
VGATPLNVIGRNLMQLGCSLNF  
>107987\_4 700.0

PQISLWQRPLITVKIGGGQVIEALLDTGADDTVVEDISLPGRWPKIIGGIGGFVRVKQYDQIPVEIFGRKIFTTVL  
VGATPVNVIGRNLMTQLGCSLNF  
>107987\_5 700.0  
PQISLWQRPLITVKIGGGQVIEALLDTGADDTVVEDISLPGRWPKIIGGIGGFVRVKQYDQIPVEIFGRKIFTTVL  
VGATPLNVIGRNLMTQLGCSLNF  
>107987\_6 700.0  
PQISLWQRPLITVKIGGGQVIEALLDTGADDTVVEDISLPGRWPKLIIGGIGGFVRVKQYDQIPVEIFGRKIFTTVL  
VGATPVNVIGRNLMTQLGCSLNF  
>107987\_7 700.0  
PQISLWQRPLITVKIGGGQVIEALLDTGADDTVVEDISLPGRWPKLIIGGIGGFVRVKQYDQIPVEIFGRKIFTTVL  
VGATPLNVIGRNLMTQLGCSLNF  
>107987\_8 700.0  
PQISLWQRPLITVKIGGGQVVEALLDTGADDTVVEDINLPGRWPKIIGGIGGFVRVKQYDQIPVEIFGRKIFTTVL  
VGATPVNVIGRNLMTQLGCSLNF  
>107987\_9 700.0  
PQISLWQRPLITVKIGGGQVVEALLDTGADDTVVEDINLPGRWPKIIGGIGGFVRVKQYDQIPVEIFGRKIFTTVL  
VGATPLNVIGRNLMTQLGCSLNF  
>107987\_10 700.0  
PQISLWQRPLITVKIGGGQVVEALLDTGADDTVVEDINLPGRWPKLIIGGIGGFVRVKQYDQIPVEIFGRKIFTTV  
LVGATPVNVIGRNLMTQLGCSLNF  
>107987\_11 700.0  
PQISLWQRPLITVKIGGGQVVEALLDTGADDTVVEDINLPGRWPKLIIGGIGGFVRVKQYDQIPVEIFGRKIFTTV  
LVGATPLNVIGRNLMTQLGCSLNF  
>107987\_12 700.0  
PQISLWQRPLITVKIGGGQVVEALLDTGADDTVVEDISLPGRWPKIIGGIGGFVRVKQYDQIPVEIFGRKIFTTVL  
VGATPVNVIGRNLMTQLGCSLNF  
>107987\_13 700.0  
PQISLWQRPLITVKIGGGQVVEALLDTGADDTVVEDISLPGRWPKIIGGIGGFVRVKQYDQIPVEIFGRKIFTTVL  
VGATPLNVIGRNLMTQLGCSLNF  
>107987\_14 700.0  
PQISLWQRPLITVKIGGGQVVEALLDTGADDTVVEDISLPGRWPKLIIGGIGGFVRVKQYDQIPVEIFGRKIFTTV  
LVGATPVNVIGRNLMTQLGCSLNF  
>107987\_15 700.0  
PQISLWQRPLITVKIGGGQVVEALLDTGADDTVVEDISLPGRWPKLIIGGIGGFVRVKQYDQIPVEIFGRKIFTTV  
LVGATPLNVIGRNLMTQLGCSLNF  
>113050\_0 700.0  
PQITLWQRPFVTVKIGGGQITEALLDTGADDTILENINLPGRWPKIIGGIGGFVVRVKQYDQIPVEIFGRKIFTTVL  
VGPTPVNVIGRNVMSQLGCTLNF  
>115739\_0 700.0  
PQITLWQRPFVTVKVGGLREALLDGADDTIFEDISLPGKWIPKIVGGIGGLIKVKQYDQIPVEIFGRKIFTTVL  
VGPTPANIIGRNLMTQLGCTLNF  
>115739\_1 700.0  
PQITLWQRPFVTVKVGGLREALLDGADDTIFEDISLPGKWIPKIVGGIGGLIKVKQYDQIPVEIFGRKIFTTVL  
VGPTPANIIGRNLMTQLGFTLNF  
>113192\_1 700.0  
PQITLWQRPFVTMKIGGQIEALLDTGADDTVLEEISLPGRWPKIIGGIGGFVVRVKQYDQVPIEVFGHKATTT  
VLVGPTPVNVIGRNLMTQLGCTLNF  
>113192\_3 700.0  
PQITLWQRPFVTMKIGGQIEALLDTGADDTVLEEISLPGRWPKIIGGIGGFVVRVKQYDQVPIEVFGQKATTT  
VLVGPTPVNVIGRNLMTQLGCTLNF  
>113192\_5 700.0  
PQITLWQRPFVTMKIGGQIEALLDTGADDTVLEEISLPGRWPKIIGGIGGFVVRVKQYDQVPIEVFGHKATTT  
VLVGPTPVNVIGRNLMTQLGCTLNF  
>113192\_7 700.0  
PQITLWQRPFVTMKIGGQIEALLDTGADDTVLEEISLPGRWPKIIGGIGGFVVRVKQYDQVPIEVFGQKATTT  
VLVGPTPVNVIGRNLMTQLGCTLNF  
>113192\_9 700.0  
PQITLWQRPFVTMKIGGQIEALLDTGADDTVLEEISLPGRWPKIIGGIGGFVVRVKQYDQVPIEVFGHKATTTV  
LVGPTPVNVIGRNLMTQLGCTLNF  
>113192\_11 700.0  
PQITLWQRPFVTMKIGGQIEALLDTGADDTVLEEISLPGRWPKIIGGIGGFVVRVKQYDQVPIEVFGQKATTTV  
LVGPTPVNVIGRNLMTQLGCTLNF  
>113192\_13 700.0

PQITLWQRPFVTMKIGGQIIEALLDTGADDTVLEEISLPGRWPKIIGGIGGFVKVRQYDQVPVEVFGHKATTT  
VLVGPTPVNVIGRNLMTQLGCTLNF  
>113192\_15 700.0  
PQITLWQRPFVTMKIGGQIIEALLDTGADDTVLEEISLPGRWPKIIGGIGGFVKVRQYDQVPVEVFGQKATTT  
VLVGPTPVNVIGRNLMTQLGCTLNF  
>143473\_16 700.0  
PQITLWQRPIVIVKIGGQLREALLDTGADDTVFEIDLPGRWTPKLIIGGIGGFVKVRQYDQVPIEICGHKIISTVL  
VGPTPANIIGRNLMTQLGCTLNF  
>143473\_18 700.0  
PQITLWQRPIVIVKIGGQLREALLDTGADDTVFEIDLPGRWTPKLIIGGIGGFVKVRQYDQVPIEICGHKVISTV  
LVGPTPANIIGRNLMTQLGCTLNF  
>143473\_20 700.0  
PQITLWQRPIVIVKIGGQLREALLDTGADDTVFEIDLPGRWTPKLIIGGIGGFVVRVQYDQVPIEICGHKIISTVL  
VGPTPANIIGRNLMTQLGCTLNF  
>143473\_22 700.0  
PQITLWQRPIVIVKIGGQLREALLDTGADDTVFEIDLPGRWTPKLIIGGIGGFVVRVQYDQVPIEICGHKVISTV  
LVGPTPANIIGRNLMTQLGCTLNF  
>143473\_24 700.0  
PQITLWQRPIVIVKIGGQIREALLDTGADDTVFEIDLPGRWTPKLIIGGIGGFVKVRQYDQVPIEICGHKIISTVL  
VGPTPANIIGRNLMTQLGCTLNF  
>143473\_26 700.0  
PQITLWQRPIVIVKIGGQIREALLDTGADDTVFEIDLPGRWTPKLIIGGIGGFVKVRQYDQVPIEICGHKVISTVL  
VGPTPANIIGRNLMTQLGCTLNF  
>143473\_28 700.0  
PQITLWQRPIVIVKIGGQIREALLDTGADDTVFEIDLPGRWTPKLIIGGIGGFVVRVQYDQVPIEICGHKIISTVL  
VGPTPANIIGRNLMTQLGCTLNF  
>143473\_30 700.0  
PQITLWQRPIVIVKIGGQIREALLDTGADDTVFEIDLPGRWTPKLIIGGIGGFVVRVQYDQVPIEICGHKVISTVL  
VGPTPANIIGRNLMTQLGCTLNF  
>115065\_2 700.0  
PQITLWQRPVVTVKIAGQLKEALIDTGADDTIFFEMNLPGRWPKLIIGGIGGFVKVRQYDQIPIEICGHKVVGT  
VLIGPTPTNVIGRNLMTQLGCTLNF  
>115065\_3 700.0  
PQITLWQRPVVTVKIAGQLKEALIDTGADDTIFFEMDLPGRWPKLIIGGIGGFVKVRQYDQIPIEICGHKVVGT  
VLIGPTPTNVIGRNLMTQLGCTLNF  
>143473\_1 700.0  
PQITLWQRPIVTVKIGGQLREALLDTGADDTVFEIDLPGRWTPKLIIGGIGGFVKVRQYDQVPIEICGHKITSTV  
LVGPTPANIIGRNLMTQLGCTLNF  
>143473\_3 700.0  
PQITLWQRPIVTVKIGGQLREALLDTGADDTVFEIDLPGRWTPKLIIGGIGGFVKVRQYDQVPIEICGHKVTST  
VLVGPTPANIIGRNLMTQLGCTLNF  
>143473\_5 700.0  
PQITLWQRPIVTVKIGGQLREALLDTGADDTVFEIDLPGRWTPKLIIGGIGGFVVRVQYDQVPIEICGHKITSTV  
LVGPTPANIIGRNLMTQLGCTLNF  
>143473\_7 700.0  
PQITLWQRPIVTVKIGGQLREALLDTGADDTVFEIDLPGRWTPKLIIGGIGGFVVRVQYDQVPIEICGHKVTST  
VLVGPTPANIIGRNLMTQLGCTLNF  
>143473\_9 700.0  
PQITLWQRPIVTVKIGGQIREALLDTGADDTVFEIDLPGRWTPKLIIGGIGGFVKVRQYDQVPIEICGHKITSTV  
LVGPTPANIIGRNLMTQLGCTLNF  
>143473\_11 700.0  
PQITLWQRPIVTVKIGGQIREALLDTGADDTVFEIDLPGRWTPKLIIGGIGGFVKVRQYDQVPIEICGHKVTSTV  
LVGPTPANIIGRNLMTQLGCTLNF  
>143473\_13 700.0  
PQITLWQRPIVTVKIGGQIREALLDTGADDTVFEIDLPGRWTPKLIIGGIGGFVVRVQYDQVPIEICGHKITSTV  
LVGPTPANIIGRNLMTQLGCTLNF  
>143473\_15 700.0  
PQITLWQRPIVTVKIGGQIREALLDTGADDTVFEIDLPGRWTPKLIIGGIGGFVVRVQYDQVPIEICGHKVTSTV  
LVGPTPANIIGRNLMTQLGCTLNF  
>115081\_0 700.0  
PQITLWQRPIVTVKIGGQLREALLDTGADDTVLEIDLPGRWPKLIVIGGIGGFVKVRQYEQVPIEICGHKVVGT  
LIGPTPSNIIGRNLMTQLGCTLNF  
>113192\_0 700.0



PQITLWQRPFVTMKIGGQLIEALLDTGADDTVLEEISLPGRWPKKIIGGIGGFVKVRQYDQVPIEVFGHKAITTV  
LVGPTPVNVIGRNLMTQLGCTLNF  
>113192\_2 700.0  
PQITLWQRPFVTMKIGGQLIEALLDTGADDTVLEEISLPGRWPKKIIGGIGGFVKVRQYDQVPIEVFGQKAITTV  
LVGPTPVNVIGRNLMTQLGCTLNF  
>103067\_1 700.0  
PQITLWQRPFITVKIAGQVKEALLDTGADDTVFEEMNLPGRWIPKLIIGGIAGFMKVRQYDQIPMEIYGHKVMA  
TVLVGPTPVNVIGRNLMTQIGCTLNF  
>145212\_0 700.0  
PQITLWQRPIVTVKIAGQLKEALLDTGADDTIFEEMNLPGRWTPKLIIGGIGGFLKVRQYDQVPIEICGHKVI  
LVGPTPVNVIGRNLMMSQIGCTLNF  
>145212\_2 700.0  
PQITLWQRPIVTVRIAGQLKEALLDTGADDTIFEEMNLPGRWTPKLIIGGIGGFLKVRQYDQVPIEICGHKVI  
LVGPTPVNVIGRNLMMSQIGCTLNF  
>145212\_4 700.0  
PQITLWQRPIITVKIAGQLKEALLDTGADDTIFEEMNLPGRWTPKLIIGGIGGFLKVRQYDQVPIEICGHKVI  
LVGPTPVNVIGRNLMMSQIGCTLNF  
>145212\_6 700.0  
PQITLWQRPIITVRIAGQLKEALLDTGADDTIFEEMNLPGRWTPKLIIGGIGGFLKVRQYDQVPIEICGHKVI  
LVGPTPVNVIGRNLMMSQIGCTLNF  
>115739\_2 700.0  
PQITLWQRPVVTVKVGQQLREALLDGADDTIFEDISLPGKWTPKIVGGIGGLIKVKQYDQIPIEICGHKVI  
VGPTPANIIGRNLMTQLGCTLNF  
>115739\_3 700.0  
PQITLWQRPVVTVKVGQQLREALLDGADDTIFEDISLPGKWTPKIVGGIGGLIKVKQYDQIPIEICGHKVI  
VGPTPANIIGRNLMTQLGFTLNF  
>143473\_0 700.0  
PQITLWQRPIVTVKIGGQLREALLDGADDTVFEDIDLPGRWTPKLIIGGIGGFVKVRQYDQVPIEICGHKI  
LVGPTPANIIGRNLMTQLGCTLNF  
>143473\_4 700.0  
PQITLWQRPIVTVKIGGQLREALLDGADDTVFEDIDLPGRWTPKLIIGGIGGFVVRQYDQVPIEICGHKI  
LVGPTPANIIGRNLMTQLGCTLNF  
>143473\_6 700.0  
PQITLWQRPIVTVKIGGQLREALLDGADDTVFEDIDLPGRWTPKLIIGGIGGFVVRQYDQVPIEICGHKVI  
LVGPTPANIIGRNLMTQLGCTLNF  
>143473\_8 700.0  
PQITLWQRPIVTVKIGGQIREALLDTGADDTVFEDIDLPGRWTPKLIIGGIGGFVKVRQYDQVPIEICGHKI  
VGPTPANIIGRNLMTQLGCTLNF  
>143473\_10 700.0  
PQITLWQRPIVTVKIGGQIREALLDTGADDTVFEDIDLPGRWTPKLIIGGIGGFVKVRQYDQVPIEICGHKVI  
LVGPTPANIIGRNLMTQLGCTLNF  
>143473\_12 700.0  
PQITLWQRPIVTVKIGGQIREALLDTGADDTVFEDIDLPGRWTPKLIIGGIGGFVVRQYDQVPIEICGHKI  
VGPTPANIIGRNLMTQLGCTLNF  
>143473\_14 700.0  
PQITLWQRPIVTVKIGGQIREALLDTGADDTVFEDIDLPGRWTPKLIIGGIGGFVVRQYDQVPIEICGHKVI  
LVGPTPANIIGRNLMTQLGCTLNF  
>115065\_0 700.0  
PQITLWQRPVVTVKIAGQLKEALIDTGADDTIFEEMNLPGRWPKKLIIGGIGGFVKVRQYDQIPIEICGHKVI  
VLIGPTPTNVIGRNLLTQIGCTLNF  
>115065\_1 700.0  
PQITLWQRPVVTVKIAGQLKEALIDTGADDTIFEEMDLPGRWPKKLIIGGIGGFVKVRQYDQIPIEICGHKVI  
VLIGPTPTNVIGRNLLTQIGCTLNF

**Sequences for the ATV-susceptible ensemble**

>259249\_3 0.5  
PQITLWQRPLVAVKIGEQLIEALLDTGADDTVLEEINLPGKWPKMIGGIGGFIKVGQYDQIPIEICGKRALGTVL  
VGPTPVNIIGRNILTQIGCTLNF  
>102783\_3 0.4  
PQITLWQRPIITIKIGGQLKEALLDTGADDTVLEDNLPGRWPKMIGGIGGFIKVRQYDEVPLEICGHKVTGT  
VLIGSTPVNIIGRNLLTQLGCTLNF  
>102783\_2 0.4  
PQITLWQRPIITIKIGGQLKEALLDTGADDTVLEDNLPGRWPKMIGGIGGFIKVRQYDEVPLEICGHKVTGT

VLIGATPVNIIGRNLLTQLGCTLNF  
>102795\_0 0.5  
PQITLWQRPVVTIKVEGQLKEALLDTGADDTVLEEMNLPGRWPKMIGGIGGFIKVRQYDQILIEICGHKARGT  
VLVGPTPVNIIGRNLLTQIGCTLNF  
>102795\_1 0.5  
PQITLWQRPVVTIKVEGQLKEALLDTGADDTVLEEMNLPGRWPKMIGGIGGFIKVRQYDQILIEICGHKARGT  
VLVGPTPVNIIGRLLTQIGCTLNF  
>102795\_4 0.5  
PQITLWQRPVVTIKVEGQLKEALLDTGADDTVLEEMNLPGRWPKMIGGLGGFIKVRQYDQILIEICGHKARG  
TVLVGPTPVNIIGRNLLTQIGCTLNF  
>102795\_5 0.5  
PQITLWQRPVVTIKVEGQLKEALLDTGADDTVLEEMNLPGRWPKMIGGLGGFIKVRQYDQILIEICGHKARG  
TVLVGPTPVNIIGRLLTQIGCTLNF  
>235727\_0 0.5  
PQITLWQRPVLPVKIGGQLKEALLDTGADDTVLEEMDLPGRWPKMIGGIGGFIKVGQYDQIQVDICGHKAIG  
TVLVGPTPVNIIGRNLLTQIGCTLNF  
>235727\_1 0.5  
PQITLWQRPVLPVVRIGGQLKEALLDTGADDTVLEEMDLPGRWPKMIGGIGGFIKVGQYDQIQVDICGHKAIG  
TVLVGPTPVNIIGRNLLTQIGCTLNF  
>235727\_2 0.5  
PQITLWQRPVVPVKIGGQLKEALLDTGADDTVLEEMDLPGRWPKMIGGIGGFIKVGQYDQIQVDICGHKAIG  
TVLVGPTPVNIIGRNLLTQIGCTLNF  
>235727\_3 0.5  
PQITLWQRPVVPVVRIGGQLKEALLDTGADDTVLEEMDLPGRWPKMIGGIGGFIKVGQYDQIQVDICGHKAIG  
TVLVGPTPVNIIGRNLLTQIGCTLNF  
>102783\_1 0.4  
PQITLWQRPVVTIKIGGQLKEALLDTGADDTVLEEMNLPGRWPKMIGGIGGFIKVRQYDEVPLEICGHKVTGT  
VLIGSTPVNIIGRNLLTQLGCTLNF  
>102783\_0 0.4  
PQITLWQRPVVTIKIGGQLKEALLDTGADDTVLEEMNLPGRWPKMIGGIGGFIKVRQYDEVPLEICGHKVTGT  
VLIGATPVNIIGRNLLTQLGCTLNF  
>109470\_1 0.5  
PQITLWQRPVVTIKIGGQLKEALLDTGADDTVLEEMNLPGRWPKMIEGIGGFIKVRQYDEISIDICGHKAVGTV  
LIGPTPVNIIGRNLLTQIGCTLNF  
>187159\_1 0.5  
PQITLWQRPVVTIKVGGQLKEALLDTGADDTVLEEMCLPGRWPKMIGGIGGFIKVRQYDQILIEICGHKVIKT  
VLIGPTPVNIIGRNLLTQIGCTLNF  
>187159\_5 0.5  
PQITLWQRPVVTIKVGGQLKEALLDTGADDTVLEEMCLPGRWPKMIGGIGGFIKVRQYDQLLIEICGHKVIKT  
VLIGPTPVNIIGRNLLTQIGCTLNF  
>187159\_9 0.5  
PQITLWQRPVVTIKVGGQLKEALLDTGADDTVLEEMCLPGKWKPKMIGGIGGFIKVRQYDQILIEICGHKVIKT  
LIGPTPVNIIGRNLLTQIGCTLNF  
>187159\_13 0.5  
PQITLWQRPVVTIKVGGQLKEALLDTGADDTVLEEMCLPGKWKPKMIGGIGGFIKVRQYDQLLIEICGHKVIKT  
VLIGPTPVNIIGRNLLTQIGCTLNF  
>187159\_17 0.5  
PQITLWQRPVVTIKVGGQLKEALLDTGADDTVLEEMCLPGRWPKMIGGIGGFIKVRQYDQILIEICGHKVIKT  
VLIGPTPVNIIGRNLLTQIGCTLNF  
>187159\_21 0.5  
PQITLWQRPVVTIKVGGQLKEALLDTGADDTVLEEMCLPGRWPKMIGGIGGFIKVRQYDQLLIEICGHKVIKT  
VLIGPTPVNIIGRNLLTQIGCTLNF  
>187159\_25 0.5  
PQITLWQRPVVTIKVGGQLKEALLDTGADDTVLEEMCLPGKWKPKMIGGIGGFIKVRQYDQILIEICGHKVIKT  
VLIGPTPVNIIGRNLLTQIGCTLNF  
>187159\_29 0.5  
PQITLWQRPVVTIKVGGQLKEALLDTGADDTVLEEMCLPGKWKPKMIGGIGGFIKVRQYDQLLIEICGHKVIKT  
VLIGPTPVNIIGRNLLTQIGCTLNF  
>187159\_33 0.5  
PQITLWQRPVVTIKVGGQLKEALLDTGADDTVLEEMCLPGRWPKMIGGIGGFIKVRQYDQILIEICGHKVIKT  
VLIGPTPVNIIGRNLLTQIGCTLNF  
>187159\_37 0.5  
PQITLWQRPVVTIKVGGQLKEALLDTGADDTVLEEMCLPGRWPKMIGGIGGFIKVRQYDQLLIEICGHKVIKT

TVLIGPTPVNIIGRNLLTQIGCTLNF  
>187159\_41 0.5  
PQITLWQRPLVTVKVGGLKEALLDTGADDTVLEEMCLPGKWKPKMIGGIGGFIKVRQYDQILIEICGHKVIKT  
VLIGPTPVNIIGRNLLTQIGCTLNF  
>187159\_45 0.5  
PQITLWQRPLVTVKVGGLKEALLDTGADDTVLEEMCLPGKWKPKMIGGIGGFIKVRQYDQLLIEICGHKVIKT  
VLIGPTPVNIIGRNLLTQIGCTLNF  
>187159\_49 0.5  
PQITLWQRPLVTVKVGGLKEALLDTGADDTVLEDMCLPGRWKPKMIGGIGGFIKVRQYDQILIEICGHKVIKT  
VLIGPTPVNIIGRNLLTQIGCTLNF  
>187159\_53 0.5  
PQITLWQRPLVTVKVGGLKEALLDTGADDTVLEDMCLPGRWKPKMIGGIGGFIKVRQYDQLLIEICGHKVIKT  
TVLIGPTPVNIIGRNLLTQIGCTLNF  
>187159\_57 0.5  
PQITLWQRPLVTVKVGGLKEALLDTGADDTVLEDMCLPGKWKPKMIGGIGGFIKVRQYDQILIEICGHKVIKT  
VLIGPTPVNIIGRNLLTQIGCTLNF  
>187159\_69 0.5  
PQITLWQRPIVTIKVGGQLKEALLDTGADDTVLEEMCLPGRWKPKMIGGIGGFIKVRQYDQLLIEICGHKVIKT  
VLIGPTPVNIIGRNLLTQIGCTLNF  
>187159\_73 0.5  
PQITLWQRPIVTIKVGGQLKEALLDTGADDTVLEEMCLPGKWKPKMIGGIGGFIKVRQYDQILIEICGHKVIKT  
LIGPTPVNIIGRNLLTQIGCTLNF  
>187159\_77 0.5  
PQITLWQRPIVTIKVGGQLKEALLDTGADDTVLEEMCLPGKWKPKMIGGIGGFIKVRQYDQLLIEICGHKVIKT  
VLIGPTPVNIIGRNLLTQIGCTLNF  
>187159\_81 0.5  
PQITLWQRPIVTIKVGGQLKEALLDTGADDTVLEDMCLPGRWKPKMIGGIGGFIKVRQYDQILIEICGHKVIKT  
LIGPTPVNIIGRNLLTQIGCTLNF  
>187159\_85 0.5  
PQITLWQRPIVTIKVGGQLKEALLDTGADDTVLEDMCLPGRWKPKMIGGIGGFIKVRQYDQLLIEICGHKVIKT  
VLIGPTPVNIIGRNLLTQIGCTLNF  
>187159\_89 0.5  
PQITLWQRPIVTIKVGGQLKEALLDTGADDTVLEDMCLPGKWKPKMIGGIGGFIKVRQYDQILIEICGHKVIKT  
LIGPTPVNIIGRNLLTQIGCTLNF  
>187159\_93 0.5  
PQITLWQRPIVTIKVGGQLKEALLDTGADDTVLEDMCLPGKWKPKMIGGIGGFIKVRQYDQLLIEICGHKVIKT  
VLIGPTPVNIIGRNLLTQIGCTLNF  
>187159\_97 0.5  
PQITLWQRPIVTIKVGGQLKEALLDTGADDTVLEEMCLPGRWKPKMIGGIGGFIKVRQYDQILIEICGHKVIKT  
VLIGPTPVNIIGRNLLTQIGCTLNF  
>187159\_101 0.5  
PQITLWQRPIVTIKVGGQLKEALLDTGADDTVLEEMCLPGRWKPKMIGGIGGFIKVRQYDQLLIEICGHKVIKT  
VLIGPTPVNIIGRNLLTQIGCTLNF  
>187159\_109 0.5  
PQITLWQRPIVTIKVGGQLKEALLDTGADDTVLEEMCLPGKWKPKMIGGIGGFIKVRQYDQLLIEICGHKVIKT  
VLIGPTPVNIIGRNLLTQIGCTLNF  
>187159\_113 0.5  
PQITLWQRPIVTIKVGGQLKEALLDTGADDTVLEDMCLPGRWKPKMIGGIGGFIKVRQYDQILIEICGHKVIKT  
VLIGPTPVNIIGRNLLTQIGCTLNF  
>187159\_117 0.5  
PQITLWQRPIVTIKVGGQLKEALLDTGADDTVLEDMCLPGRWKPKMIGGIGGFIKVRQYDQLLIEICGHKVIKT  
VLIGPTPVNIIGRNLLTQIGCTLNF  
>187159\_121 0.5  
PQITLWQRPIVTIKVGGQLKEALLDTGADDTVLEDMCLPGKWKPKMIGGIGGFIKVRQYDQILIEICGHKVIKT  
VLIGPTPVNIIGRNLLTQIGCTLNF  
>187159\_125 0.5  
PQITLWQRPIVTIKVGGQLKEALLDTGADDTVLEDMCLPGKWKPKMIGGIGGFIKVRQYDQLLIEICGHKVIKT  
VLIGPTPVNIIGRNLLTQIGCTLNF  
>109422\_4 0.5  
PQITLWQRPLVTVRIGGQLIEALLDTGADDTVLEEMNLPGRWKPKMIGGIGGFIKVRQYDQILVEICGHKAIGT  
VLIGPTPVNIIGRNLLTQIGCTLNF  
>109422\_5 0.5  
PQITLWQRPLVTVRIGGQLIEALLDTGADDTVLEEMNLPGRWKPKMIGGIGGFIKVRQYDQILVEICGHKAIGT

VLLGPTPVNIIGRNLLTQIGCTLNF  
>109422\_6 0.5  
PQITLWQRPLVTVRIGGQLIEALLDTGADDTVLEEMNLPKWKPKMIGGIGGFIVRQYDQILVEICGHKAIGTV  
LIGPTPVNIIGRNLLTQIGCTLNF  
>109422\_7 0.5  
PQITLWQRPLVTVRIGGQLIEALLDTGADDTVLEEMNLPKWKPKMIGGIGGFIVRQYDQILVEICGHKAIGTV  
LLGPTPVNIIGRNLLTQIGCTLNF  
>109422\_8 0.5  
PQITLWQRPLVTVRIGGQLMEALLDTGADDTVLEEMNLPGRWPKMIGGIGGFIVRQYDQILVEICGHKAIGT  
VLIGPTPVNIIGRNLLTQIGCTLNF  
>109422\_9 0.5  
PQITLWQRPLVTVRIGGQLMEALLDTGADDTVLEEMNLPGRWPKMIGGIGGFIVRQYDQILVEICGHKAIGT  
VLLGPTPVNIIGRNLLTQIGCTLNF  
>109422\_10 0.5  
PQITLWQRPLVTVRIGGQLMEALLDTGADDTVLEEMNLPKWKPKMIGGIGGFIVRQYDQILVEICGHKAIGT  
VLIGPTPVNIIGRNLLTQIGCTLNF  
>109422\_11 0.5  
PQITLWQRPLVTVRIGGQLMEALLDTGADDTVLEEMNLPKWKPKMIGGIGGFIVRQYDQILVEICGHKAIGT  
VLLGPTPVNIIGRNLLTQIGCTLNF  
>206413\_0 0.5  
PQITLWQRPLVTIKVGGQLKEALLDTGADDTVLEDMNLPGRWPKMIGGIGGFIVGQYDQILIEICGHKAIGT  
VLGPTPVNIIGRNLLTQIGCTLNF  
>216593\_0 0.4  
PQITLWQRPLVTIKIGGQLKEALLDTGADDTVLEDMNLPGRWPKMIGGIGGFIVGQYDQILIEICGHKAIGTV  
LLGPTPVNIIGRNLLTQIGCTLNF  
>216593\_1 0.4  
PQITLWQRPLVTIKIGGQLKEALLDTGADDTVLEDMNLPGRWPKMIGGIGGFIVGQYDQILVEICGHKAIGT  
VLLGPTPVNIIGRNLLTQIGCTLNF  
>216593\_2 0.4  
PQITLWQRPLVTIKIGGQLKEALLDTGADDTVLEDMNLPKWKPKMIGGIGGFIVGQYDQILIEICGHKAIGTV  
LLGPTPVNIIGRNLLTQIGCTLNF  
>216593\_3 0.4  
PQITLWQRPLVTIKIGGQLKEALLDTGADDTVLEDMNLPKWKPKMIGGIGGFIVGQYDQILVEICGHKAIGTV  
LLGPTPVNIIGRNLLTQIGCTLNF  
>187159\_3 0.5  
PQITLWQRPLVTIKVGGQLKEALLDTGADDTVLEEMCLPGRWPKMIGGIGGFIVRQYDQIPIEICGHKVIGT  
VLIGPTPVNIIGRNLLTQIGCTLNF  
>187159\_7 0.5  
PQITLWQRPLVTIKVGGQLKEALLDTGADDTVLEEMCLPGRWPKMIGGIGGFIVRQYDQIPIEICGHKVIGT  
VLIGPTPVNIIGRNLLTQIGCTLNF  
>187159\_11 0.5  
PQITLWQRPLVTIKVGGQLKEALLDTGADDTVLEEMCLPGKWKPKMIGGIGGFIVRQYDQIPIEICGHKVIGT  
VLIGPTPVNIIGRNLLTQIGCTLNF  
>187159\_15 0.5  
PQITLWQRPLVTIKVGGQLKEALLDTGADDTVLEEMCLPGKWKPKMIGGIGGFIVRQYDQIPIEICGHKVIGT  
VLIGPTPVNIIGRNLLTQIGCTLNF  
>187159\_19 0.5  
PQITLWQRPLVTIKVGGQLKEALLDTGADDTVLEEMCLPGRWPKMIGGIGGFIVRQYDQIPIEICGHKVIGT  
VLIGPTPVNIIGRNLLTQIGCTLNF  
>187159\_23 0.5  
PQITLWQRPLVTIKVGGQLKEALLDTGADDTVLEEMCLPGRWPKMIGGIGGFIVRQYDQIPIEICGHKVIGT  
VLIGPTPVNIIGRNLLTQIGCTLNF  
>187159\_31 0.5  
PQITLWQRPLVTIKVGGQLKEALLDTGADDTVLEEMCLPGKWKPKMIGGIGGFIVRQYDQIPIEICGHKVIGT  
VLIGPTPVNIIGRNLLTQIGCTLNF  
>187159\_95 0.5  
PQITLWQRPIVTIKVGGQLKEALLDTGADDTVLEEMCLPGKWKPKMIGGIGGFIVRQYDQIPIEICGHKVIGT  
VLIGPTPVNIIGRNLLTQIGCTLNF  
>187159\_103 0.5  
PQITLWQRPIVTVKVGQLKEALLDTGADDTVLEEMCLPGRWPKMIGGIGGFIVRQYDQIPIEICGHKVIGT  
VLIGPTPVNIIGRNLLTQIGCTLNF  
>187159\_107 0.5  
PQITLWQRPIVTVKVGQLKEALLDTGADDTVLEEMCLPGKWKPKMIGGIGGFIVRQYDQIPIEICGHKVIGT

VLIGPTPVNIIGRNLLTQIGCTLNF  
>187159\_111 0.5  
PQITLWQRPIVTVKVGGLKEALLDTGADDTVLEEMCLPGKWKPKMIGGIGGFIKVRQYDQLPIEICGHKVIGT  
VLIGPTPVNIIGRNLLTQIGCTLNF  
>187159\_115 0.5  
PQITLWQRPIVTVKVGGLKEALLDTGADDTVLEDMCLPGRWKPKMIGGIGGFIKVRQYDQIPIEICGHKVIGT  
VLIGPTPVNIIGRNLLTQIGCTLNF  
>187159\_119 0.5  
PQITLWQRPIVTVKVGGLKEALLDTGADDTVLEDMCLPGRWKPKMIGGIGGFIKVRQYDQLPIEICGHKVIGT  
VLIGPTPVNIIGRNLLTQIGCTLNF  
>187159\_123 0.5  
PQITLWQRPIVTVKVGGLKEALLDTGADDTVLEDMCLPGKWKPKMIGGIGGFIKVRQYDQIPIEICGHKVIGT  
VLIGPTPVNIIGRNLLTQIGCTLNF  
>187159\_127 0.5  
PQITLWQRPIVTVKVGGLKEALLDTGADDTVLEDMCLPGKWKPKMIGGIGGFIKVRQYDQLPIEICGHKVIGT  
VLIGPTPVNIIGRNLLTQIGCTLNF  
>257929\_0 0.4  
PQITLWQRPLVTVKVGGLKEALLDTGADDTVLEEMNLQGRWKPKMIGGIGGFIKVKQYDQIPVEICGHKAIG  
TVLVGPTPVNIIGRNLLTQIGCTLNF  
>187159\_14 0.5  
PQITLWQRPLVTIKVGGLKEALLDTGADDTVLEEMCLPGKWKPKMIGGIGGFIKVRQYDQLPIEICGHKAIGT  
VLIGPTPVNIIGRNLLTQIGCTLNF  
>187159\_18 0.5  
PQITLWQRPLVTIKVGGLKEALLDTGADDTVLEDMCLPGRWKPKMIGGIGGFIKVRQYDQIPIEICGHKAIGT  
VLIGPTPVNIIGRNLLTQIGCTLNF  
>187159\_22 0.5  
PQITLWQRPLVTIKVGGLKEALLDTGADDTVLEDMCLPGRWKPKMIGGIGGFIKVRQYDQLPIEICGHKAIGT  
VLIGPTPVNIIGRNLLTQIGCTLNF  
>187159\_26 0.5  
PQITLWQRPLVTIKVGGLKEALLDTGADDTVLEDMCLPGKWKPKMIGGIGGFIKVRQYDQIPIEICGHKAIGT  
VLIGPTPVNIIGRNLLTQIGCTLNF  
>187159\_30 0.5  
PQITLWQRPLVTIKVGGLKEALLDTGADDTVLEDMCLPGKWKPKMIGGIGGFIKVRQYDQLPIEICGHKAIGT  
VLIGPTPVNIIGRNLLTQIGCTLNF  
>187159\_34 0.5  
PQITLWQRPLVTVKVGGLKEALLDTGADDTVLEEMCLPGRWKPKMIGGIGGFIKVRQYDQIPIEICGHKAIGT  
VLIGPTPVNIIGRNLLTQIGCTLNF  
>187159\_38 0.5  
PQITLWQRPLVTVKVGGLKEALLDTGADDTVLEEMCLPGRWKPKMIGGIGGFIKVRQYDQLPIEICGHKAIG  
TVLIGPTPVNIIGRNLLTQIGCTLNF  
>187159\_42 0.5  
PQITLWQRPLVTVKVGGLKEALLDTGADDTVLEEMCLPGKWKPKMIGGIGGFIKVRQYDQIPIEICGHKAIGT  
VLIGPTPVNIIGRNLLTQIGCTLNF  
>187159\_46 0.5  
PQITLWQRPLVTVKVGGLKEALLDTGADDTVLEEMCLPGKWKPKMIGGIGGFIKVRQYDQLPIEICGHKAIG  
TVLIGPTPVNIIGRNLLTQIGCTLNF  
>187159\_50 0.5  
PQITLWQRPLVTVKVGGLKEALLDTGADDTVLEDMCLPGRWKPKMIGGIGGFIKVRQYDQIPIEICGHKAIGT  
VLIGPTPVNIIGRNLLTQIGCTLNF  
>187159\_54 0.5  
PQITLWQRPLVTVKVGGLKEALLDTGADDTVLEDMCLPGRWKPKMIGGIGGFIKVRQYDQLPIEICGHKAIG  
TVLIGPTPVNIIGRNLLTQIGCTLNF  
>187159\_58 0.5  
PQITLWQRPLVTVKVGGLKEALLDTGADDTVLEDMCLPGKWKPKMIGGIGGFIKVRQYDQIPIEICGHKAIGT  
VLIGPTPVNIIGRNLLTQIGCTLNF  
>187159\_66 0.5  
PQITLWQRPIVTIKVGGLKEALLDTGADDTVLEEMCLPGRWKPKMIGGIGGFIKVRQYDQIPIEICGHKAIGTV  
LIGPTPVNIIGRNLLTQIGCTLNF  
>187159\_70 0.5  
PQITLWQRPIVTIKVGGLKEALLDTGADDTVLEEMCLPGRWKPKMIGGIGGFIKVRQYDQLPIEICGHKAIGT  
VLIGPTPVNIIGRNLLTQIGCTLNF  
>187159\_98 0.5  
PQITLWQRPIVTVKVGGLKEALLDTGADDTVLEEMCLPGRWKPKMIGGIGGFIKVRQYDQIPIEICGHKAIGT

VLIGPTPVNIIGRNLLTQIGCTLNF  
>187159\_102 0.5  
PQITLWQRPIVTVKVGGLKEALLDTGADDTVLEEMCLPGRWPKMIGGIGGFIVRQYDQLPIEICGHKAIGT  
VLIGPTPVNIIGRNLLTQIGCTLNF  
>187159\_106 0.5  
PQITLWQRPIVTVKVGGLKEALLDTGADDTVLEEMCLPGKWKPKMIGGIGGFIVRQYDQPIEICGHKAIGT  
VLIGPTPVNIIGRNLLTQIGCTLNF  
>187159\_110 0.5  
PQITLWQRPIVTVKVGGLKEALLDTGADDTVLEEMCLPGKWKPKMIGGIGGFIVRQYDQLPIEICGHKAIGT  
VLIGPTPVNIIGRNLLTQIGCTLNF  
>187159\_114 0.5  
PQITLWQRPIVTVKVGGLKEALLDTGADDTVLEDMCLPGRWPKMIGGIGGFIVRQYDQPIEICGHKAIGT  
VLIGPTPVNIIGRNLLTQIGCTLNF  
>187159\_118 0.5  
PQITLWQRPIVTVKVGGLKEALLDTGADDTVLEDMCLPGRWPKMIGGIGGFIVRQYDQLPIEICGHKAIGT  
VLIGPTPVNIIGRNLLTQIGCTLNF  
>187159\_122 0.5  
PQITLWQRPIVTVKVGGLKEALLDTGADDTVLEDMCLPGKWKPKMIGGIGGFIVRQYDQPIEICGHKAIGT  
VLIGPTPVNIIGRNLLTQIGCTLNF  
>187159\_126 0.5  
PQITLWQRPIVTVKVGGLKEALLDTGADDTVLEDMCLPGKWKPKMIGGIGGFIVRQYDQLPIEICGHKAIGT  
VLIGPTPVNIIGRNLLTQIGCTLNF  
>87104\_0 0.4  
PQITLWQRPLVAIKIGGLKEALLDTGADDTVLEEINLPGRWPKMIGGIGGFIVKQYDQVPIEICGHKAIGTV  
LVGPTPVNIIGRNLLTQLGCTLNF  
>87104\_1 0.4  
PQITLWQRPLVAIRIGGLKEALLDTGADDTVLEEINLPGRWPKMIGGIGGFIVKQYDQVPIEICGHKAIGTV  
LVGPTPVNIIGRNLLTQLGCTLNF  
>198533\_0 0.5  
PQITLWQRPLVTIKIGGLKEALLDTGADDTVLEEMELPGRWPKMIGGIGGFIVRQYDQPIEICGHKARTGT  
VLVGPPTPVNIIGRNLLTQIGCTLNF  
>148111\_0 0.3  
PQITLWQRPLVTVKIGGLKEALLDTGADDTVLEEMNLPGRWPKRMIGGIGGFIVRQYDQISMEICGHKAIG  
TVLIGPTPVNIIGRNLLTQIGCTLNF  
>148111\_1 0.3  
PQITLWQRPLVTVKIGGLKEALLDTGADDTVLEEMNLPGRWPKRMIGGIGGFIVRQYDQVSMEICGHKAIG  
TVLIGPTPVNIIGRNLLTQIGCTLNF  
>198527\_0 0.4  
PQITLWQRPLVTIKIGGLKEALLDTGADDTVLEEMNLPGRWPKMIGGIGGFIVRQYDEVTDICGHKAIGT  
VLIGPTPVNIIGRNLLTQIGCTLNF

**Sequences for the DRV-resistant ensemble**

>205693\_6 580.0  
PQITLWQRPFIPVKIGGQQMEALLDTGADDTILEGTNLPGRWTPKIVGGIGGFMRVGQYDQPIEICGQKIIGTV  
LVGPTPANIIGRNVMVTQIGCTLNF  
>205693\_7 580.0  
PQITLWQRPFIPVKIGGQQMEALLDTGADDTILEGTNLPGRWTPKIVGGIGGFMRVGQYDQPIEYQKIIIGTV  
LVGPTPANIIGRNVMVTQIGCTLNF  
>205693\_2 580.0  
PQITLWQRPFIPVKIGGQQMEALLDTGADDTILEETNLPGRWTPKIVGGIGGFMRVGQYDQPIEICGQKIIGTV  
LVGPTPANIIGRNVMVTQIGCTLNF  
>205693\_3 580.0  
PQITLWQRPFIPVKIGGQQMEALLDTGADDTILEETNLPGRWTPKIVGGIGGFMRVGQYDQPIEYQKIIIGTV  
LVGPTPANIIGRNVMVTQIGCTLNF  
>205693\_4 580.0  
PQITLWQRPFIPVKIGGQQMEALLDTGADDTILEGINLPGRWTPKIVGGIGGFMRVGQYDQPIEICGQKIIGTV  
LVGPTPANIIGRNVMVTQIGCTLNF  
>205693\_5 580.0  
PQITLWQRPFIPVKIGGQQMEALLDTGADDTILEGINLPGRWTPKIVGGIGGFMRVGQYDQPIEYQKIIIGTV  
LVGPTPANIIGRNVMVTQIGCTLNF  
>205693\_0 580.0  
PQITLWQRPFIPVKIGGQQMEALLDTGADDTILEEINLPGRWTPKIVGGIGGFMRVGQYDQPIEICGQKIIGTV  
VGPPTPANIIGRNVMVTQIGCTLNF

>205693\_1 580.0  
PQITLWQRPFIPVKIGGQQMEALLDTGADDTILEEINLPGRWTPKIVGGIGGFMRVQYDQIPIEYQKIIIGTVL  
VGPTPANIIGRNVMTQIGCTLNF  
>117075\_0 500.0  
PQITLWQRPLITVKIGGQLVEALMDTGADDTIFEGINLPGRWPKMIGGIGGFNLVRQYEQIPIEICGHKILSTVL  
VGSTPLNVIGRNVMSKIGCTLNF  
>117075\_1 500.0  
PQITLWQRPLITVKIGGQLVEALMDTGADDTIFEGINLPGRWPKMIGGIGGFNLVREYEQIPIEICGHKILSTVL  
VGSTPLNVIGRNVMSKIGCTLNF  
>117075\_2 500.0  
PQITLWQRPLITVKVGGQLVEALMDTGADDTIFEGINLPGRWPKMIGGIGGFNLVRQYEQIPIEICGHKILSTV  
LVGSTPLNVIGRNVMSKIGCTLNF  
>117075\_3 500.0  
PQITLWQRPLITVKVGGQLVEALMDTGADDTIFEGINLPGRWPKMIGGIGGFNLVREYEQIPIEICGHKILSTV  
LVGSTPLNVIGRNVMSKIGCTLNF  
>117075\_4 500.0  
PQITLWQRPFITVKIGGQLVEALMDTGADDTIFEGINLPGRWPKMIGGIGGFNLVRQYEQIPIEICGHKILSTVL  
VGSTPLNVIGRNVMSKIGCTLNF  
>117075\_5 500.0  
PQITLWQRPFITVKIGGQLVEALMDTGADDTIFEGINLPGRWPKMIGGIGGFNLVREYEQIPIEICGHKILSTVL  
VGSTPLNVIGRNVMSKIGCTLNF  
>117075\_6 500.0  
PQITLWQRPFITVKVGGQLVEALMDTGADDTIFEGINLPGRWPKMIGGIGGFNLVRQYEQIPIEICGHKILSTV  
LVGSTPLNVIGRNVMSKIGCTLNF  
>117075\_7 500.0  
PQITLWQRPFITVKVGGQLVEALMDTGADDTIFEGINLPGRWPKMIGGIGGFNLVREYEQIPIEICGHKILSTV  
LVGSTPLNVIGRNVMSKIGCTLNF  
>117075\_8 500.0  
PQITLWQRPVITVKIGGQLVEALMDTGADDTIFEGINLPGRWPKMIGGIGGFNLVRQYEQIPIEICGHKILSTVL  
VGSTPLNVIGRNVMSKIGCTLNF  
>117075\_9 500.0  
PQITLWQRPVITVKIGGQLVEALMDTGADDTIFEGINLPGRWPKMIGGIGGFNLVREYEQIPIEICGHKILSTVL  
VGSTPLNVIGRNVMSKIGCTLNF  
>117075\_10 500.0  
PQITLWQRPVITVKVGGQLVEALMDTGADDTIFEGINLPGRWPKMIGGIGGFNLVRQYEQIPIEICGHKILSTV  
LVGSTPLNVIGRNVMSKIGCTLNF  
>117075\_11 500.0  
PQITLWQRPVITVKVGGQLVEALMDTGADDTIFEGINLPGRWPKMIGGIGGFNLVREYEQIPIEICGHKILSTV  
LVGSTPLNVIGRNVMSKIGCTLNF  
>103779\_0 500.0  
PQITLWQRPIIKVKIGGQLVEALLDTGADDTILEGINLPGRWPKKIVGGIGGFMKVKEYDQIPVEICGHKIIISTVLV  
GPTPVNIIIGRNVMTQIGCTLNF  
>103779\_1 500.0  
PQITLWQRPIIKVKIGGQLVEALLDTGADDTILEGINLPGRWPKKIVGGIGGFMKVKEYDQIPVEICGHKIIISTVLV  
GPTPVNVIGRNVMTQIGCTLNF  
>103779\_2 500.0  
PQITLWQRPIIKVKIGGQLVEALLDTGADDTILEGINLPGRWPKKIVGGIGGFMKVKEYDQIPVEICGHKVISTVL  
VGPTPVNIIIGRNVMTQIGCTLNF  
>103779\_3 500.0  
PQITLWQRPIIKVKIGGQLVEALLDTGADDTILEGINLPGRWPKKIVGGIGGFMKVKEYDQIPVEICGHKVISTVL  
VGPTPVNVIGRNVMTQIGCTLNF  
>103779\_4 500.0  
PQITLWQRPIIKVKIGGQLVEALLDTGADDTILEGIDLPGRWPKKIVGGIGGFMKVKEYDQIPVEICGHKIIISTVLV  
GPTPVNIIIGRNVMTQIGCTLNF  
>103779\_5 500.0  
PQITLWQRPIIKVKIGGQLVEALLDTGADDTILEGIDLPGRWPKKIVGGIGGFMKVKEYDQIPVEICGHKIIISTVLV  
GPTPVNVIGRNVMTQIGCTLNF  
>103779\_6 500.0  
PQITLWQRPIIKVKIGGQLVEALLDTGADDTILEGIDLPGRWPKKIVGGIGGFMKVKEYDQIPVEICGHKVISTVL  
VGPTPVNIIIGRNVMTQIGCTLNF  
>103779\_7 500.0  
PQITLWQRPIIKVKIGGQLVEALLDTGADDTILEGIDLPGRWPKKIVGGIGGFMKVKEYDQIPVEICGHKVISTVL  
VGPTPVNVIGRNVMTQIGCTLNF

>103779\_8 500.0  
PQITLWQRPIIKVKIGGQLVEALLDTGADDTIFEGINLPGRWPKPKIVGGIGGFMKVKEYDQIPVEICGHKIISTVL  
VGPTPVNIIGRNVMTQIGCTLNF

>103779\_9 500.0  
PQITLWQRPIIKVKIGGQLVEALLDTGADDTIFEGINLPGRWPKPKIVGGIGGFMKVKEYDQIPVEICGHKIISTVL  
VGPTPVNVIGRNVMTQIGCTLNF

>103779\_10 500.0  
PQITLWQRPIIKVKIGGQLVEALLDTGADDTIFEGINLPGRWPKPKIVGGIGGFMKVKEYDQIPVEICGHKIVISTVL  
VGPTPVNIIGRNVMTQIGCTLNF

>103779\_11 500.0  
PQITLWQRPIIKVKIGGQLVEALLDTGADDTIFEGINLPGRWPKPKIVGGIGGFMKVKEYDQIPVEICGHKIVISTVL  
VGPTPVNVIGRNVMTQIGCTLNF

>103779\_12 500.0  
PQITLWQRPIIKVKIGGQLVEALLDTGADDTIFEGIDLPRWPKPKIVGGIGGFMKVKEYDQIPVEICGHKIISTVL  
VGPTPVNIIGRNVMTQIGCTLNF

>103779\_13 500.0  
PQITLWQRPIIKVKIGGQLVEALLDTGADDTIFEGIDLPRWPKPKIVGGIGGFMKVKEYDQIPVEICGHKIISTVL  
VGPTPVNVIGRNVMTQIGCTLNF

>103779\_14 500.0  
PQITLWQRPIIKVKIGGQLVEALLDTGADDTIFEGIDLPRWPKPKIVGGIGGFMKVKEYDQIPVEICGHKIVISTVL  
VGPTPVNIIGRNVMTQIGCTLNF

>103779\_15 500.0  
PQITLWQRPIIKVKIGGQLVEALLDTGADDTIFEGIDLPRWPKPKIVGGIGGFMKVKEYDQIPVEICGHKIVISTVL  
VGPTPVNVIGRNVMTQIGCTLNF

>147550\_0 500.0  
PQITLWQRPIIKVKIGGQLVEALLDTGADDTIFEGIDLPRWPKPKIVGGIGGFMKVKEYDQIPVEICGHKIVISTV  
LVGPTPVNVIGRNVMTQIGCTLNF

>86742\_0 500.0  
PQITLWQRPFITIKIGGQLREALLDTGADDTIFEDIQLPGRWPKPKIVGGIGGFLKVKEYEQVPIEICGHKIVISTVL  
TGPTPVNVIGRNVMTQLGCTLNF

>86742\_1 500.0  
PQITLWQRPFITIKIGGQLREALLDTGADDTIFEDIQLPGRWPKPKIVGGIGGFLKVKEYEQVPIEICGHKIVISTVL  
TGPTPVNVIGRNVMTQLGCTLNF

>103067\_0 500.0  
PQITLWQRPFITVKIAGQLKEALLDTGADDTVFQEMNLPGRWIPKLIGGIAGFMKVRQYDQIPMEIYGHKVMAT  
VLVGPTPVNVIGRNLMTQIGCTLNF

>103067\_1 500.0  
PQITLWQRPFITVKIAGQVKEALLDTGADDTVFQEMNLPGRWIPKLIGGIAGFMKVRQYDQIPMEIYGHKVMA  
TVLVGPTPVNVIGRNLMTQIGCTLNF

>90022\_35 491.0  
PQITLWQRPFVAVKIGGQLREALLDTGADNTIFEDVTLPRWQPKIVGGIGGLLKVKQYDQVPIEWGHKVVG  
TVLIGPTPVNVLGRDVMQIGCTLNF

>90022\_36 491.0  
PQITLWQRPFVAVKIGGQLREALLDTGADNTIFEDVTLPRWQPKIVGGIGGLLKVKQYDQVPIEVWGHKVVG  
TVLIGPTPVNVIGRDLMTQIGCTLNF

>90022\_37 491.0  
PQITLWQRPFVAVKIGGQLREALLDTGADNTIFEDVTLPRWQPKIVGGIGGLLKVKQYDQVPIEVWGHKVVG  
TVLIGPTPVNVIGRDLMTQIGCTLNF

>90022\_38 491.0  
PQITLWQRPFVAVKIGGQLREALLDTGADNTIFEDVTLPRWQPKIVGGIGGLLKVKQYDQVPIEVWGHKVVG  
TVLIGPTPVNVLGRDLMTQIGCTLNF

>90022\_39 491.0  
PQITLWQRPFVAVKIGGQLREALLDTGADNTIFEDVTLPRWQPKIVGGIGGLLKVKQYDQVPIEVWGHKVVG  
TVLIGPTPVNVLGRDVMQIGCTLNF

>90022\_40 491.0  
PQITLWQRPFVAVKIGGQLREALLDTGADNTIFEDVTLPRWQPKIVGGIGGLLRVKQYDQVPIEWGHKVVG  
TVLIGPTPVNVIGRDLMTQIGCTLNF

>90022\_41 491.0  
PQITLWQRPFVAVKIGGQLREALLDTGADNTIFEDVTLPRWQPKIVGGIGGLLRVKQYDQVPIEWGHKVVG  
TVLIGPTPVNVIGRDLMTQIGCTLNF

>90022\_42 491.0  
PQITLWQRPFVAVKIGGQLREALLDTGADNTIFEDVTLPRWQPKIVGGIGGLLRVKQYDQVPIEWGHKVVG  
TVLIGPTPVNVLGRDLMTQIGCTLNF



>90022\_43 491.0  
PQITLWQRPFFVAVKIGGQLREALDGTADNTIFEDVTLPGRWQPKIVGGIGGLLRVKQYDQVPIEIVWGHKVVG  
TVLIGPTPVNVLGRDVMQTIGCTLNF

>90022\_44 491.0  
PQITLWQRPFFVAVKIGGQLREALDGTADNTIFEDVTLPGRWQPKIVGGIGGLLRVKQYDQVPIEIVWGHKVVG  
TVLIGPTPVNVLGRDLMQTIGCTLNF

>90022\_45 491.0  
PQITLWQRPFFVAVKIGGQLREALDGTADNTIFEDVTLPGRWQPKIVGGIGGLLRVKQYDQVPIEIVWGHKVVG  
TVLIGPTPVNVLGRDVMQTIGCTLNF

>90022\_46 491.0  
PQITLWQRPFFVAVKIGGQLREALDGTADNTIFEDVTLPGRWQPKIVGGIGGLLRVKQYDQVPIEIVWGHKVVG  
TVLIGPTPVNVLGRDLMQTIGCTLNF

>90022\_47 491.0  
PQITLWQRPFFVAVKIGGQLREALDGTADNTIFEDVTLPGRWQPKIVGGIGGLLRVKQYDQVPIEIVWGHKVVG  
TVLIGPTPVNVLGRDVMQTIGCTLNF

>90022\_48 491.0  
PQITLWQRPFFVAVRIGGQLREALDGTADNTIFEDVTLPGRWQPKIVGGIGGLLKVKQYDQVPIEIVWGHKVVG  
TVLIGPTPVNVLGRDLMQTIGCTLNF

>90022\_49 491.0  
PQITLWQRPFFVAVRIGGQLREALDGTADNTIFEDVTLPGRWQPKIVGGIGGLLKVKQYDQVPIEIVWGHKVVG  
TVLIGPTPVNVLGRDVMQTIGCTLNF

>90022\_50 491.0  
PQITLWQRPFFVAVRIGGQLREALDGTADNTIFEDVTLPGRWQPKIVGGIGGLLKVKQYDQVPIEIVWGHKVVG  
TVLIGPTPVNVLGRDLMQTIGCTLNF

>90022\_51 491.0  
PQITLWQRPFFVAVRIGGQLREALDGTADNTIFEDVTLPGRWQPKIVGGIGGLLKVKQYDQVPIEIVWGHKVVG  
TVLIGPTPVNVLGRDVMQTIGCTLNF

>90022\_52 491.0  
PQITLWQRPFFVAVRIGGQLREALDGTADNTIFEDVTLPGRWQPKIVGGIGGLLKVKQYDQVPIEIVWGHKVVG  
TVLIGPTPVNVLGRDLMQTIGCTLNF

>90022\_53 491.0  
PQITLWQRPFFVAVRIGGQLREALDGTADNTIFEDVTLPGRWQPKIVGGIGGLLKVKQYDQVPIEIVWGHKVVG  
TVLIGPTPVNVLGRDVMQTIGCTLNF

>90022\_54 491.0  
PQITLWQRPFFVAVRIGGQLREALDGTADNTIFEDVTLPGRWQPKIVGGIGGLLKVKQYDQVPIEIVWGHKVVG  
TVLIGPTPVNVLGRDLMQTIGCTLNF

>90022\_55 491.0  
PQITLWQRPFFVAVRIGGQLREALDGTADNTIFEDVTLPGRWQPKIVGGIGGLLKVKQYDQVPIEIVWGHKVVG  
TVLIGPTPVNVLGRDVMQTIGCTLNF

>90022\_56 491.0  
PQITLWQRPFFVAVRIGGQLREALDGTADNTIFEDVTLPGRWQPKIVGGIGGLLRVKQYDQVPIEIVWGHKVVG  
TVLIGPTPVNVLGRDLMQTIGCTLNF

>90022\_57 491.0  
PQITLWQRPFFVAVRIGGQLREALDGTADNTIFEDVTLPGRWQPKIVGGIGGLLRVKQYDQVPIEIVWGHKVVG  
TVLIGPTPVNVLGRDVMQTIGCTLNF

>90022\_58 491.0  
PQITLWQRPFFVAVRIGGQLREALDGTADNTIFEDVTLPGRWQPKIVGGIGGLLRVKQYDQVPIEIVWGHKVVG  
TVLIGPTPVNVLGRDLMQTIGCTLNF

>90022\_59 491.0  
PQITLWQRPFFVAVRIGGQLREALDGTADNTIFEDVTLPGRWQPKIVGGIGGLLRVKQYDQVPIEIVWGHKVVG  
TVLIGPTPVNVLGRDVMQTIGCTLNF

>90022\_60 491.0  
PQITLWQRPFFVAVRIGGQLREALDGTADNTIFEDVTLPGRWQPKIVGGIGGLLRVKQYDQVPIEIVWGHKVVG  
TVLIGPTPVNVLGRDLMQTIGCTLNF

>90022\_61 491.0  
PQITLWQRPFFVAVRIGGQLREALDGTADNTIFEDVTLPGRWQPKIVGGIGGLLRVKQYDQVPIEIVWGHKVVG  
TVLIGPTPVNVLGRDVMQTIGCTLNF

>90022\_62 491.0  
PQITLWQRPFFVAVRIGGQLREALDGTADNTIFEDVTLPGRWQPKIVGGIGGLLRVKQYDQVPIEIVWGHKVVG  
TVLIGPTPVNVLGRDLMQTIGCTLNF

>90022\_96 491.0  
PQITLWQRPFFIAVKIGGQLREALDGTADNTIFEDVTLPGRWQPKIVGGIGGLLKVKQYDQVPIEIVWGHKVVGT  
VLIGPTPVNVLGRDLMQTIGCTLNF

>90022\_97 491.0  
PQITLWQRPFIAVKIGGQLREALLDTGADNTIFEDVTLPGRWQPKIVGGIGGLLKVKQYDQVPIEIWGHKVVGT  
VLIGPTPVNVIGRDVMTQIGCTLNF

>90022\_98 491.0  
PQITLWQRPFIAVKIGGQLREALLDTGADNTIFEDVTLPGRWQPKIVGGIGGLLKVKQYDQVPIEIWGHKVVGT  
VLIGPTPVNVLGRDLMTQIGCTLNF

>90022\_99 491.0  
PQITLWQRPFIAVKIGGQLREALLDTGADNTIFEDVTLPGRWQPKIVGGIGGLLKVKQYDQVPIEIWGHKVVGT  
VLIGPTPVNVLGRDVMTQIGCTLNF

>90022\_100 491.0  
PQITLWQRPFIAVKIGGQLREALLDTGADNTIFEDVTLPGRWQPKIVGGIGGLLKVKQYDQVPIEVWGHKVVG  
TVLIGPTPVNVIGRDLMQIGCTLNF

>90022\_101 491.0  
PQITLWQRPFIAVKIGGQLREALLDTGADNTIFEDVTLPGRWQPKIVGGIGGLLKVKQYDQVPIEVWGHKVVG  
TVLIGPTPVNVIGRDVMTQIGCTLNF

>90022\_102 491.0  
PQITLWQRPFIAVKIGGQLREALLDTGADNTIFEDVTLPGRWQPKIVGGIGGLLKVKQYDQVPIEVWGHKVVG  
TVLIGPTPVNVLGRDLMTQIGCTLNF

>90022\_103 491.0  
PQITLWQRPFIAVKIGGQLREALLDTGADNTIFEDVTLPGRWQPKIVGGIGGLLKVKQYDQVPIEVWGHKVVG  
TVLIGPTPVNVLGRDVMTQIGCTLNF

>90022\_104 491.0  
PQITLWQRPFIAVKIGGQLREALLDTGADNTIFEDVTLPGRWQPKIVGGIGGLLRVKQYDQVPIEIWGHKVVGT  
VLIGPTPVNVIGRDLMQIGCTLNF

>90022\_105 491.0  
PQITLWQRPFIAVKIGGQLREALLDTGADNTIFEDVTLPGRWQPKIVGGIGGLLRVKQYDQVPIEIWGHKVVGT  
VLIGPTPVNVIGRDVMTQIGCTLNF

>90022\_106 491.0  
PQITLWQRPFIAVKIGGQLREALLDTGADNTIFEDVTLPGRWQPKIVGGIGGLLRVKQYDQVPIEIWGHKVVGT  
VLIGPTPVNVLGRDLMTQIGCTLNF

>90022\_107 491.0  
PQITLWQRPFIAVKIGGQLREALLDTGADNTIFEDVTLPGRWQPKIVGGIGGLLRVKQYDQVPIEIWGHKVVGT  
VLIGPTPVNVLGRDVMTQIGCTLNF

>90022\_108 491.0  
PQITLWQRPFIAVKIGGQLREALLDTGADNTIFEDVTLPGRWQPKIVGGIGGLLRVKQYDQVPIEVWGHKVVG  
TVLIGPTPVNVIGRDLMQIGCTLNF

>90022\_109 491.0  
PQITLWQRPFIAVKIGGQLREALLDTGADNTIFEDVTLPGRWQPKIVGGIGGLLRVKQYDQVPIEVWGHKVVG  
TVLIGPTPVNVIGRDVMTQIGCTLNF

>90022\_110 491.0  
PQITLWQRPFIAVKIGGQLREALLDTGADNTIFEDVTLPGRWQPKIVGGIGGLLRVKQYDQVPIEVWGHKVVG  
TVLIGPTPVNVLGRDLMTQIGCTLNF

>90022\_111 491.0  
PQITLWQRPFIAVKIGGQLREALLDTGADNTIFEDVTLPGRWQPKIVGGIGGLLRVKQYDQVPIEVWGHKVVG  
TVLIGPTPVNVLGRDVMTQIGCTLNF

>90022\_112 491.0  
PQITLWQRPFIAVRIGGQLREALLDTGADNTIFEDVTLPGRWQPKIVGGIGGLLKVKQYDQVPIEIWGHKVVGT  
VLIGPTPVNVIGRDLMQIGCTLNF

>90022\_113 491.0  
PQITLWQRPFIAVRIGGQLREALLDTGADNTIFEDVTLPGRWQPKIVGGIGGLLKVKQYDQVPIEIWGHKVVGT  
VLIGPTPVNVIGRDVMTQIGCTLNF

>90022\_114 491.0  
PQITLWQRPFIAVRIGGQLREALLDTGADNTIFEDVTLPGRWQPKIVGGIGGLLKVKQYDQVPIEIWGHKVVGT  
VLIGPTPVNVLGRDLMTQIGCTLNF

>90022\_115 491.0  
PQITLWQRPFIAVRIGGQLREALLDTGADNTIFEDVTLPGRWQPKIVGGIGGLLKVKQYDQVPIEIWGHKVVGT  
VLIGPTPVNVLGRDVMTQIGCTLNF

>90022\_116 491.0  
PQITLWQRPFIAVRIGGQLREALLDTGADNTIFEDVTLPGRWQPKIVGGIGGLLKVKQYDQVPIEVWGHKVVG  
TVLIGPTPVNVIGRDLMQIGCTLNF

>90022\_117 491.0  
PQITLWQRPFIAVRIGGQLREALLDTGADNTIFEDVTLPGRWQPKIVGGIGGLLKVKQYDQVPIEVWGHKVVG  
TVLIGPTPVNVIGRDVMTQIGCTLNF

>90022\_118 491.0  
PQITLWQRPFIIVRIGGQLREALDGTADNTIFEDVTLPGRWQPKIVGGIGGLLKVKQYDQVPIEVWGHKVVG  
TVLIGPTPVNVLGRDLMTQIGCTLNF  
>90022\_119 491.0  
PQITLWQRPFIIVRIGGQLREALDGTADNTIFEDVTLPGRWQPKIVGGIGGLLKVKQYDQVPIEVWGHKVVG  
TVLIGPTPVNVLGRDVMQIGCTLNF  
>90022\_120 491.0  
PQITLWQRPFIIVRIGGQLREALDGTADNTIFEDVTLPGRWQPKIVGGIGGLLRVKQYDQVPIEIVWGHKVVGT  
VLIGPTPVNVIGRDLMTQIGCTLNF  
>117069\_0 500.0  
PQITLWQRPILTVKIAGQLTEALLDGTADDTIFQDINLPGRWTPKIVGGIGGLLRVRQYEQVPIEVCGHKIITTVLI  
GPTPVNVLGRNLMQIGCTLNF  
>117069\_1 500.0  
PQITLWQRPILTVKVAGQLTEALLDGTADDTIFQDINLPGRWTPKIVGGIGGLLRVRQYEQVPIEVCGHKIITTVL  
IGPTPVNVLGRNLMQIGCTLNF  
>90022\_12 491.0  
PQITLWQRPFVTVKIGGQLREALDGTADNTIFEDVTLPGRWQPKIVGGIGGLLRVKQYDQVPIEVWGHKVV  
GTVLIGPTPVNVIGRDLMTQIGCTLNF  
>90022\_22 491.0  
PQITLWQRPFVTVRIGGQLREALDGTADNTIFEDVTLPGRWQPKIVGGIGGLLKVKQYDQVPIEVWGHKVV  
GTVLIGPTPVNVLGRDLMTQIGCTLNF  
>90022\_23 491.0  
PQITLWQRPFVTVRIGGQLREALDGTADNTIFEDVTLPGRWQPKIVGGIGGLLKVKQYDQVPIEVWGHKVV  
GTVLIGPTPVNVLGRDVMQIGCTLNF  
>90022\_65 491.0  
PQITLWQRPFITVKIGGQLREALDGTADNTIFEDVTLPGRWQPKIVGGIGGLLKVKQYDQVPIEIVWGHKVVGT  
VLIGPTPVNVIGRDLMTQIGCTLNF

**Sequences for the DRV-susceptible ensemble**

>216607\_0 0.2  
PQITLWQRPPLVTIKIGGQLKEALLDGTADDTVLEEMNLPGRWKPRMIGGIGGFIKVGQYDQMPIEICGHKTEG  
TVLVGPTPVNIIGRNLLTQIGCTLNF  
>216607\_1 0.2  
PQITLWQRPPLVTIKIGGQLKEALLDGTADDTVLEEMNLPGRWKPRMIGGIGGFIKVGQYDQMPIEICGHKTEG  
TVLVGPTPVNIIGRNLLTQMGCTLNF  
>216607\_2 0.2  
PQITLWQRPPLVTIKIGGQLKEALLDGTADDTVLEEINLPGRWKPRMIGGIGGFIKVGQYDQMPIEICGHKTEG  
VLVGPPTVNIIGRNLLTQIGCTLNF  
>216607\_3 0.2  
PQITLWQRPPLVTIKIGGQLKEALLDGTADDTVLEEINLPGRWKPRMIGGIGGFIKVGQYDQMPIEICGHKTEG  
VLVGPPTVNIIGRNLLTQMGCTLNF  
>116920\_3 0.2  
PQITLWQRPPLVTIKIGGQLKEALLDGTADDTVLEEMNLPGRWKPRMIGGLGGFIKVRQYDQVPIEICGHKTVS  
TVLIGPTPANIIGRNLLTQLGCTLNF  
>116920\_1 0.2  
PQITLWQRPPLVTIKIGGQLKEALLDGTADDTVLEEMNLPGRWKPRMIGGLGGFIKVRQYDQVPIEICGHKIVST  
VLIGPTPANIIGRNLLTQLGCTLNF  
>258503\_0 0.3  
PQITLWQRPPLVTIKIGGQLKEAILDGTADDTVLEEMNLPGRWKPKMIGGIGGFIKVKQYDQPIEICGYKIVIGTVL  
VGPTPVNIIGRSLLTRLGCTLNF  
>116920\_2 0.2  
PQITLWQRPPLVTIKIGGQLKEALLDGTADDTVLEEMNLPGRWKPRMIGGLGGFIKVRQYDQVPIEICGHKTVG  
TVLIGPTPANIIGRNLLTQLGCTLNF  
>87104\_0 0.4  
PQITLWQRPPLVAIKIGGQLKEALLDGTADDTVLEEINLPGRWKPKMIGGIGGFIKVKQYDQVPIEICGHKAIGTV  
LVGPTPVNIIIGRNLLTQLGCTLNF  
>206413\_0 0.4  
PQITLWQRPPLVTIKVGGQLKEALLDGTADDTVLEDMNLPGRWKPKMIGGIGGFIKVGQYDQILIEICGHKAIGT  
VLVGPPTVNIIGRNLLTQIGCTLNF  
>216593\_0 0.3  
PQITLWQRPPLVTIKIGGQLKEALLDGTADDTVLEDMNLPGRWKPKMIGGIGGFIKVGQYDHILIEICGHKAIGTV  
LLGPTPVNIIIGRNLLTQLGCTLNF  
>216593\_1 0.3

PQITLWQRPLVTIKIGGQLKEALLDTGADDTVLEDMNLPGRWKPKMIGGIGGFIKVGQYDHILVEICGHKAIGT  
VLLGPTPVNIIGRNLLTQLGCTLNF  
>216593\_2 0.3  
PQITLWQRPLVTIKIGGQLKEALLDTGADDTVLEDMNLPKWKPKMIGGIGGFIKVGQYDHILIEICGHKAIGTV  
LLGPTPVNIIGRNLLTQLGCTLNF  
>216593\_3 0.3  
PQITLWQRPLVTIKIGGQLKEALLDTGADDTVLEDMNLPKWKPKMIGGIGGFIKVGQYDHILVEICGHKAIGTV  
LLGPTPVNIIGRNLLTQLGCTLNF  
>216597\_0 0.4  
PQITLWQRPLVTIKIGGQLKEALLDTGADDTVLEEMDIPGRWKPKMIGGIGGFIKVGQYDQVLEICGHKAIGTV  
LVGPTPVNIIGRNLLTQIGCTLNF  
>216597\_1 0.4  
PQITLWQRPLVTIKIGGQLKEALLDTGADDTVLEEMDIPGRWKPKMIGGIGGFIKVGQYDQVLEICGHKAIGTV  
LIGPTPVNIIGRNLLTQIGCTLNF  
>216597\_2 0.4  
PQITLWQRPLVTIKIGGQLKEALLDTGADDTVLEEMDIPGRWKPKMIGGIGGFIKVGQYDQVLEICGHKAMGT  
VLVGPPTVNIIGRNLLTQIGCTLNF  
>216597\_3 0.4  
PQITLWQRPLVTIKIGGQLKEALLDTGADDTVLEEMDIPGRWKPKMIGGIGGFIKVGQYDQVLEICGHKAMGT  
VLIGPTPVNIIGRNLLTQIGCTLNF  
>216597\_4 0.4  
PQITLWQRPLVTIKIGGQLKEALLDTGADDTVLEEMDIPGRWKPKMIGGIGGFIKVGQYDQVLEICGHKAVGT  
VLVGPPTVNIIGRNLLTQIGCTLNF  
>216597\_5 0.4  
PQITLWQRPLVTIKIGGQLKEALLDTGADDTVLEEMDIPGRWKPKMIGGIGGFIKVGQYDQVLEICGHKAVGT  
VLIGPTPVNIIGRNLLTQIGCTLNF  
>216597\_12 0.4  
PQITLWQRPLVTIKIGGQLKEALLDTGADDTVLEEMDIPGRWKPKMIGGIGGFIKVGQYDQVLEICGHKAIGT  
VLVGPPTVNIIGRNLLTQIGCTLNF  
>216597\_13 0.4  
PQITLWQRPLVTIKIGGQLKEALLDTGADDTVLEEMDIPGRWKPKMIGGIGGFIKVGQYDQVLEICGHKAIGT  
VLIGPTPVNIIGRNLLTQIGCTLNF  
>216597\_14 0.4  
PQITLWQRPLVTIKIGGQLKEALLDTGADDTVLEEMDIPGRWKPKMIGGIGGFIKVGQYDQVLEICGHKAMG  
TVLVGPPTVNIIGRNLLTQIGCTLNF  
>216597\_15 0.4  
PQITLWQRPLVTIKIGGQLKEALLDTGADDTVLEEMDIPGRWKPKMIGGIGGFIKVGQYDQVLEICGHKAMG  
TVLIGPTPVNIIGRNLLTQIGCTLNF  
>216597\_16 0.4  
PQITLWQRPLVTIKIGGQLKEALLDTGADDTVLEEMDIPGRWKPKMIGGIGGFIKVGQYDQVLEICGHKAVGT  
VLVGPPTVNIIGRNLLTQIGCTLNF  
>216597\_17 0.4  
PQITLWQRPLVTIKIGGQLKEALLDTGADDTVLEEMDIPGRWKPKMIGGIGGFIKVGQYDQVLEICGHKAVGT  
VLIGPTPVNIIGRNLLTQIGCTLNF  
>216597\_24 0.4  
PQITLWQRPLVTIKIGGQLKEALLDTGADDTVLEEMDIPGKWKPKMIGGIGGFIKVGQYDQVLEICGHKAIGTV  
LVGPTPVNIIGRNLLTQIGCTLNF  
>216597\_25 0.4  
PQITLWQRPLVTIKIGGQLKEALLDTGADDTVLEEMDIPGKWKPKMIGGIGGFIKVGQYDQVLEICGHKAIGTV  
LIGPTPVNIIGRNLLTQIGCTLNF  
>216597\_26 0.4  
PQITLWQRPLVTIKIGGQLKEALLDTGADDTVLEEMDIPGKWKPKMIGGIGGFIKVGQYDQVLEICGHKAMGT  
VLVGPPTVNIIGRNLLTQIGCTLNF  
>216597\_27 0.4  
PQITLWQRPLVTIKIGGQLKEALLDTGADDTVLEEMDIPGKWKPKMIGGIGGFIKVGQYDQVLEICGHKAMGT  
VLIGPTPVNIIGRNLLTQIGCTLNF  
>216597\_28 0.4  
PQITLWQRPLVTIKIGGQLKEALLDTGADDTVLEEMDIPGKWKPKMIGGIGGFIKVGQYDQVLEICGHKAVGT  
VLVGPPTVNIIGRNLLTQIGCTLNF  
>216597\_29 0.4  
PQITLWQRPLVTIKIGGQLKEALLDTGADDTVLEEMDIPGKWKPKMIGGIGGFIKVGQYDQVLEICGHKAVGT  
VLIGPTPVNIIGRNLLTQIGCTLNF  
>216597\_36 0.4

PQITLWQRPLVTIKIGGQLKEALLDTGADDTVLEEMDIPGKWKPKMIGGIGGFIKVGQYDQVLVEICGHKAIGT  
VLVGPTPVNIIGRNLLTQIGCTLNF  
>216597\_37 0.4  
PQITLWQRPLVTIKIGGQLKEALLDTGADDTVLEEMDIPGKWKPKMIGGIGGFIKVGQYDQVLVEICGHKAIGT  
VLIGPTPVNIIGRNLLTQIGCTLNF  
>216597\_38 0.4  
PQITLWQRPLVTIKIGGQLKEALLDTGADDTVLEEMDIPGKWKPKMIGGIGGFIKVGQYDQVLVEICGHKAMGT  
VLVGPTPVNIIGRNLLTQIGCTLNF  
>216597\_39 0.4  
PQITLWQRPLVTIKIGGQLKEALLDTGADDTVLEEMDIPGKWKPKMIGGIGGFIKVGQYDQVLVEICGHKAMGT  
VLIGPTPVNIIGRNLLTQIGCTLNF  
>216597\_60 0.4  
PQITLWQRPLVTIKIGGQLKEALLDTGADDTVLEEMDMPGRWKPKMIGGIGGFIKVGQYDQVLVEICGHKAIG  
TVLVGPTPVNIIGRNLLTQIGCTLNF  
>216597\_326 0.4  
PQITLWQRPLVTIKIGGQLKEALLDTGADDTVLEEMRIPGKWKPKMIGGIGGFIKVGQYDQVLVEICGHKAMGT  
VLVGPTPVNIIGRNLLTQIGCTLNF  
>216597\_327 0.4  
PQITLWQRPLVTIKIGGQLKEALLDTGADDTVLEEMRIPGKWKPKMIGGIGGFIKVGQYDQVLVEICGHKAMGT  
VLIGPTPVNIIGRNLLTQIGCTLNF  
>216597\_328 0.4  
PQITLWQRPLVTIKIGGQLKEALLDTGADDTVLEEMRIPGKWKPKMIGGIGGFIKVGQYDQVLVEICGHKAVGT  
VLVGPTPVNIIGRNLLTQIGCTLNF  
>216597\_329 0.4  
PQITLWQRPLVTIKIGGQLKEALLDTGADDTVLEEMRIPGKWKPKMIGGIGGFIKVGQYDQVLVEICGHKAVGT  
VLIGPTPVNIIGRNLLTQIGCTLNF  
>216597\_336 0.4  
PQITLWQRPLVTIKIGGQLKEALLDTGADDTVLEEMRMPGRWKPKMIGGIGGFIKVGQYDQVLVEICGHKAIGT  
VLVGPTPVNIIGRNLLTQIGCTLNF  
>216597\_337 0.4  
PQITLWQRPLVTIKIGGQLKEALLDTGADDTVLEEMRMPGRWKPKMIGGIGGFIKVGQYDQVLVEICGHKAIGT  
VLIGPTPVNIIGRNLLTQIGCTLNF  
>216597\_338 0.4  
PQITLWQRPLVTIKIGGQLKEALLDTGADDTVLEEMRMPGRWKPKMIGGIGGFIKVGQYDQVLVEICGHKAMG  
TVLVGPTPVNIIGRNLLTQIGCTLNF  
>216597\_339 0.4  
PQITLWQRPLVTIKIGGQLKEALLDTGADDTVLEEMRMPGRWKPKMIGGIGGFIKVGQYDQVLVEICGHKAMG  
TVLIGPTPVNIIGRNLLTQIGCTLNF  
>216597\_340 0.4  
PQITLWQRPLVTIKIGGQLKEALLDTGADDTVLEEMRMPGRWKPKMIGGIGGFIKVGQYDQVLVEICGHKAVG  
TVLVGPTPVNIIGRNLLTQIGCTLNF  
>216597\_341 0.4  
PQITLWQRPLVTIKIGGQLKEALLDTGADDTVLEEMRMPGRWKPKMIGGIGGFIKVGQYDQVLVEICGHKAVG  
TVLIGPTPVNIIGRNLLTQIGCTLNF  
>216597\_348 0.4  
PQITLWQRPLVTIKIGGQLKEALLDTGADDTVLEEMRMPGRWKPKMIGGIGGFIKVGQYDQVLVEICGHKAIG  
TVLVGPTPVNIIGRNLLTQIGCTLNF  
>216597\_349 0.4  
PQITLWQRPLVTIKIGGQLKEALLDTGADDTVLEEMRMPGRWKPKMIGGIGGFIKVGQYDQVLVEICGHKAIG  
TVLIGPTPVNIIGRNLLTQIGCTLNF  
>216597\_350 0.4  
PQITLWQRPLVTIKIGGQLKEALLDTGADDTVLEEMRMPGRWKPKMIGGIGGFIKVGQYDQVLVEICGHKAMG  
TVLVGPTPVNIIGRNLLTQIGCTLNF  
>216597\_351 0.4  
PQITLWQRPLVTIKIGGQLKEALLDTGADDTVLEEMRMPGRWKPKMIGGIGGFIKVGQYDQVLVEICGHKAMG  
TVLIGPTPVNIIGRNLLTQIGCTLNF  
>216597\_352 0.4  
PQITLWQRPLVTIKIGGQLKEALLDTGADDTVLEEMRMPGRWKPKMIGGIGGFIKVGQYDQVLVEICGHKAVG  
TVLVGPTPVNIIGRNLLTQIGCTLNF  
>216597\_400 0.4  
PQITLWQRPLVTIKIGGQLKEALLDTGADDTVLEEMDIPGRWKPKMIGGIGGFIKVGQYDQVLVEICGHKAVG  
TVLVGPTPVNIIGRNLLTQIGCTLNF  
>216597\_401 0.4

PQITLWQRPLVTIKVGGQLKEALLDTGADDTVLEEMDIPGRWKPKMIGGIGGFIKVGQYDQVLVEICGHKAVG  
TVLIGPTPVNIIGRNLLTQIGCTLNF  
>216597\_408 0.4  
PQITLWQRPLVTIKVGGQLKEALLDTGADDTVLEEMDIPGKWKPKMIGGIGGFIKVGQYDQVLVEICGHKAIGT  
VLVGPTPVNIIGRNLLTQIGCTLNF  
>216597\_409 0.4  
PQITLWQRPLVTIKVGGQLKEALLDTGADDTVLEEMDIPGKWKPKMIGGIGGFIKVGQYDQVLVEICGHKAIGT  
VLIGPTPVNIIGRNLLTQIGCTLNF  
>259193\_0 0.3  
PQITLWQRPLVTIKIGGQIKEALLDTGADDTVLEEDLPGKWKPKMIGGIGGFIKVGQYDEILVEICGHKAIGTVL  
VGPTPVNIIGRNLLTQIGCTLNF  
>259193\_1 0.3  
PQITLWQRPLVTIKIGGQIKEALLDTGADDTVLEEDLPGKWKPKMIGGIGGFIKVGQYDEILVEIWGHKAIGTVL  
VGPTPVNIIGRNLLTQIGCTLNF  
>259193\_2 0.3  
PQITLWQRPLVTIKIGGQIKEALLDTGADDTVLEEDLPGKWKPKMIGGIGGFIKVGQYDEILVDICGHKAIGTVL  
VGPTPVNIIGRNLLTQIGCTLNF  
>259193\_3 0.3  
PQITLWQRPLVTIKIGGQIKEALLDTGADDTVLEEDLPGKWKPKMIGGIGGFIKVGQYDEILVDIWDGHKAIGTVL  
VGPTPVNIIGRNLLTQIGCTLNF  
>109484\_0 0.3  
PQITLWQRPLVTIKIGGQLKEALLDTGADDTVLEEMNLPGRWKPKMIGGIGGFIKVRQYDQIPIEICGHKATGT  
VLIGPTPVNIIGRNLLTQLGCTLNF  
>116505\_0 0.3  
PQITLWQRPLVTIKIGGQLKEALLDTGADDTVLEEMNLPGRWKPKMIGGIGGFIKVRQYDQIPIEICGHKAEGT  
VLVGPTPVNIIGRNLLTQIGCTLNF  
>116505\_1 0.3  
PQITLWQRPLVTIKIGGQLKEALLDTGADDTVLEEMSLPGRWKPKMIGGIGGFIKVRQYDQIPIEICGHKAEGT  
VLVGPTPVNIIGRNLLTQIGCTLNF  
>145683\_0 0.3  
PQITLWQRPIVTIKIGGQLKEALLDTGADDTVLEEMNLPGRWKPKMIGGIGGFIKVRQYDQIAIEICGHKAIGTV  
LVGPTPVNIIGRNLLTQLGCTLNF  
>145683\_1 0.3  
PQITLWQRPIVTIKIGGQLKEALLDTGADDTVLEEDINLPGRWKPKMIGGIGGFIKVRQYDQIAIEICGHKAIGTVL  
VGPTPVNIIGRNLLTQLGCTLNF  
>198527\_0 0.3  
PQITLWQRPLVTIKIGGQLKEALLDTGADDTVLEEMNLPGRWKPKMIGGIGGFIKVRQYDEVTIDICGHKAIGT  
VLIGPTPVNIIGRNLLTQIGCTLNF  
>116920\_0 0.2  
PQITLWQRPLVTIKIGGQLKEALLDTGADDTVLEEMNLPGRWKPRMIGGLGGFIKVRQYDQVPIEICGHKIVGT  
VLIGPTPVNIIGRNLLTQLGCTLNF  
>257927\_0 0.3  
PQITLWQRPLVTIRIGGQLKEALLDTGADDTVLEEMNLPGRWKPKMIGGIGGFIKVGQYDQIPIEICGHKAVGT  
VLIGPTPVNIIGRNLLTQIGCTLNF  
>187173\_0 0.2  
PQITLWQRPLVTIKIGGQLKEALLDTGADDTVLEDINLPKWKPKMIGGIGGFIKVRQYDQILIEICGKKAIGTVL  
VGPTPVNIIGRNMLTQIGCTLNF  
>187173\_1 0.2  
PQITLWQRPLVTIKIGGQLKEALLDTGADDTVLEDINLPKWKPKMIGGIGGFIKVRQYDQILIEICGKKAIGTVL  
IGPTPVNIIGRNMLTQIGCTLNF  
>187173\_2 0.2  
PQITLWQRPLVTIKIGGQLKEALLDTGADDTVLEDINLPGNWKPKMIGGIGGFIKVRQYDQILIEICGKKAIGTV  
LVGPTPVNIIGRNMLTQIGCTLNF  
>187173\_3 0.2  
PQITLWQRPLVTIKIGGQLKEALLDTGADDTVLEDINLPGNWKPKMIGGIGGFIKVRQYDQILIEICGKKAIGTV  
LIGPTPVNIIGRNMLTQIGCTLNF  
>187173\_4 0.2  
PQITLWQRPLVTIKIGGQLTEALLDTGADDTVLEDINLPKWKPKMIGGIGGFIKVRQYDQILIEICGKKAIGTVL  
VGPTPVNIIGRNMLTQIGCTLNF  
>187173\_5 0.2  
PQITLWQRPLVTIKIGGQLTEALLDTGADDTVLEDINLPKWKPKMIGGIGGFIKVRQYDQILIEICGKKAIGTVL  
IGPTPVNIIGRNMLTQIGCTLNF  
>187173\_6 0.2

PQITLWQRPLVTVKIGGQLTEALLDTGADDTVLEDINLPGNWPKMIGGIGGFIKVRQYDQILIEICGKKAIGTVL  
VGPTPVNIIGRNMLTQIGCTLNF  
>187173\_7 0.2  
PQITLWQRPLVTVKIGGQLTEALLDTGADDTVLEDINLPGNWPKMIGGIGGFIKVRQYDQILIEICGKKAIGTVL  
IGPTPVNIIGRNMLTQIGCTLNF  
>187173\_8 0.2  
PQITLWQRPLVTVRIGGQLKEALLDTGADDTVLEDINLPGKWKPKMIGGIGGFIKVRQYDQILIEICGKKAIGTV  
LVGPTPVNIIGRNMLTQIGCTLNF  
>187173\_9 0.2  
PQITLWQRPLVTVRIGGQLKEALLDTGADDTVLEDINLPGKWKPKMIGGIGGFIKVRQYDQILIEICGKKAIGTV  
LIGPTPVNIIGRNMLTQIGCTLNF  
>187173\_10 0.2  
PQITLWQRPLVTVRIGGQLKEALLDTGADDTVLEDINLPGNWPKMIGGIGGFIKVRQYDQILIEICGKKAIGTV  
LVGPTPVNIIGRNMLTQIGCTLNF  
>187173\_11 0.2  
PQITLWQRPLVTVRIGGQLKEALLDTGADDTVLEDINLPGNWPKMIGGIGGFIKVRQYDQILIEICGKKAIGTV  
LIGPTPVNIIGRNMLTQIGCTLNF  
>187173\_12 0.2  
PQITLWQRPLVTVRIGGQLTEALLDTGADDTVLEDINLPGKWKPKMIGGIGGFIKVRQYDQILIEICGKKAIGTVL  
VGPTPVNIIGRNMLTQIGCTLNF  
>187173\_13 0.2  
PQITLWQRPLVTVRIGGQLTEALLDTGADDTVLEDINLPGKWKPKMIGGIGGFIKVRQYDQILIEICGKKAIGTVL  
IGPTPVNIIGRNMLTQIGCTLNF  
>187173\_14 0.2  
PQITLWQRPLVTVRIGGQLTEALLDTGADDTVLEDINLPGNWPKMIGGIGGFIKVRQYDQILIEICGKKAIGTVL  
VGPTPVNIIGRNMLTQIGCTLNF  
>187173\_15 0.2  
PQITLWQRPLVTVRIGGQLTEALLDTGADDTVLEDINLPGNWPKMIGGIGGFIKVRQYDQILIEICGKKAIGTVL  
IGPTPVNIIGRNMLTQIGCTLNF  
>187173\_16 0.2  
PQITLWQRPIVTVKIGGQLKEALLDTGADDTVLEDINLPGKWKPKMIGGIGGFIKVRQYDQILIEICGKKAIGTVL  
VGPTPVNIIGRNMLTQIGCTLNF  
>187173\_17 0.2  
PQITLWQRPIVTVKIGGQLKEALLDTGADDTVLEDINLPGKWKPKMIGGIGGFIKVRQYDQILIEICGKKAIGTVL  
IGPTPVNIIGRNMLTQIGCTLNF  
>187173\_18 0.2  
PQITLWQRPIVTVKIGGQLKEALLDTGADDTVLEDINLPGNWPKMIGGIGGFIKVRQYDQILIEICGKKAIGTVL  
VGPTPVNIIGRNMLTQIGCTLNF  
>187173\_19 0.2  
PQITLWQRPIVTVKIGGQLKEALLDTGADDTVLEDINLPGNWPKMIGGIGGFIKVRQYDQILIEICGKKAIGTVL  
IGPTPVNIIGRNMLTQIGCTLNF  
>187173\_20 0.2  
PQITLWQRPIVTVKIGGQLTEALLDTGADDTVLEDINLPGKWKPKMIGGIGGFIKVRQYDQILIEICGKKAIGTVL  
VGPTPVNIIGRNMLTQIGCTLNF  
>187173\_21 0.2  
PQITLWQRPIVTVKIGGQLTEALLDTGADDTVLEDINLPGKWKPKMIGGIGGFIKVRQYDQILIEICGKKAIGTVLI  
GPTPVNIIGRNMLTQIGCTLNF  
>187173\_22 0.2  
PQITLWQRPIVTVKIGGQLTEALLDTGADDTVLEDINLPGNWPKMIGGIGGFIKVRQYDQILIEICGKKAIGTVL  
VGPTPVNIIGRNMLTQIGCTLNF  
>187173\_23 0.2  
PQITLWQRPIVTVKIGGQLTEALLDTGADDTVLEDINLPGNWPKMIGGIGGFIKVRQYDQILIEICGKKAIGTVLI  
GPTPVNIIGRNMLTQIGCTLNF  
>187173\_24 0.2  
PQITLWQRPIVTVRIGGQLKEALLDTGADDTVLEDINLPGKWKPKMIGGIGGFIKVRQYDQILIEICGKKAIGTVL  
VGPTPVNIIGRNMLTQIGCTLNF  
>187173\_25 0.2  
PQITLWQRPIVTVRIGGQLKEALLDTGADDTVLEDINLPGKWKPKMIGGIGGFIKVRQYDQILIEICGKKAIGTVL  
IGPTPVNIIGRNMLTQIGCTLNF  
>187173\_26 0.2  
PQITLWQRPIVTVRIGGQLKEALLDTGADDTVLEDINLPGNWPKMIGGIGGFIKVRQYDQILIEICGKKAIGTVL  
VGPTPVNIIGRNMLTQIGCTLNF  
>187173\_27 0.2

PQITLWQRPIVTVRIGGQLKEALLDTGADDTVLEDINLPGNWPKMIGGIGGFIKVRQYDQILIEICGKKAIGTVL  
IGPTPVNIIGRNMLTQIGCTLNF  
>187173\_28 0.2  
PQITLWQRPIVTVRIGGQLTEALLDTGADDTVLEDINLPGKWPKMIGGIGGFIKVRQYDQILIEICGKKAIGTVL  
VGPTPVNIIGRNMLTQIGCTLNF  
>187173\_29 0.2  
PQITLWQRPIVTVRIGGQLTEALLDTGADDTVLEDINLPGKWPKMIGGIGGFIKVRQYDQILIEICGKKAIGTVLI  
GPTPVNIIGRNMLTQIGCTLNF  
>187173\_30 0.2  
PQITLWQRPIVTVRIGGQLTEALLDTGADDTVLEDINLPGNWPKMIGGIGGFIKVRQYDQILIEICGKKAIGTVL  
VGPTPVNIIGRNMLTQIGCTLNF  
>187173\_31 0.2  
PQITLWQRPIVTVRIGGQLTEALLDTGADDTVLEDINLPGNWPKMIGGIGGFIKVRQYDQILIEICGKKAIGTVL  
IGPTPVNIIGRNMLTQIGCTLNF

**Sequences for the FPV-resistant ensemble**

>235731\_150 200.0  
PQITLWQRPFVTVVGGQTTEALLDTGADDTILEDIPLPGRWIPKIIGGIGGLIKVGQYDQIPIEFGHTVIGTVLV  
GATPVNVIGRNLMTTRIGCTLNF  
>235731\_152 200.0  
PQITLWQRPFVTVVGGQTTEALLDTGADDTILEDIPLPGRWIPKIIGGIGGLIKVGQYDQIPIEFGQTVIGTVLV  
GATPVNVIGRNLMTTRIGCTLNF  
>235731\_153 200.0  
PQITLWQRPFVTVVGGQTTEALLDTGADDTILEDIPLPGRWIPKIIGGIGGLIRVGQYDQIPIEFGHTVIGTVLV  
GATPVNVIGRNLMTTRIGCTLNF  
>235685\_1 200.0  
PQITLWQRPFVTVKVGQTTEALLDTGADDTIFEDINLPGRWIPKIIGGIGGLIKVGQYDQIPIEFGHTVIGTVLV  
GATPVNVIGRNLMTTRIGCTLNF  
>235685\_4 200.0  
PQITLWQRPFVTVKVGQTTEALLDTGADDTIFEDINLPGRWIPKIIGGIGGLIRVGQYDQIPIEFGHTVIGTVLV  
GATPVNVIGRNLMTTRIGCTLNF  
>235685\_13 200.0  
PQITLWQRPFVTVKVGQTTEALLDTGADDTIFEDIHLPGRWIPKIIGGIGGLIKVGQYDQIPIEFGHTVIGTVLV  
GATPVNVIGRNLMTTRIGCTLNF  
>235685\_16 200.0  
PQITLWQRPFVTVKVGQTTEALLDTGADDTIFEDIHLPGRWIPKIIGGIGGLIRVGQYDQIPIEFGHTVIGTVLV  
GATPVNVIGRNLMTTRIGCTLNF  
>235685\_25 200.0  
PQITLWQRPFVTVVGGQTTEALLDTGADDTIFEDINLPGRWIPKIIGGIGGLIKVGQYDQIPIEFGHTVIGTVLV  
GATPVNVIGRNLMTTRIGCTLNF  
>235685\_28 200.0  
PQITLWQRPFVTVVGGQTTEALLDTGADDTIFEDINLPGRWIPKIIGGIGGLIRVGQYDQIPIEFGHTVIGTVLV  
GATPVNVIGRNLMTTRIGCTLNF  
>235685\_37 200.0  
PQITLWQRPFVTVVGGQTTEALLDTGADDTIFEDIHLPGRWIPKIIGGIGGLIKVGQYDQIPIEFGHTVIGTVLV  
GATPVNVIGRNLMTTRIGCTLNF  
>235685\_40 200.0  
PQITLWQRPFVTVVGGQTTEALLDTGADDTIFEDIHLPGRWIPKIIGGIGGLIRVGQYDQIPIEFGHTVIGTVLV  
GATPVNVIGRNLMTTRIGCTLNF  
>235731\_1 200.0  
PQITLWQRPFVTVKVGQTTEALLDTGADDTILEDINLPGRWIPKIIGGIGGFIKVGQYDQIPIEFGHTVIGTVLV  
GATPVNVIGRNLMTTRIGCTLNF  
>235731\_4 200.0  
PQITLWQRPFVTVKVGQTTEALLDTGADDTILEDINLPGRWIPKIIGGIGGFIKVRQYDQIPIEFGHTVIGTVLV  
GATPVNVIGRNLMTTRIGCTLNF  
>235731\_7 200.0  
PQITLWQRPFVTVKVGQTTEALLDTGADDTILEDINLPGRWIPKIIGGIGGLIKVGQYDQIPIEFGHTVIGTVLV  
GATPVNVIGRNLMTTRIGCTLNF  
>235731\_10 200.0  
PQITLWQRPFVTVKVGQTTEALLDTGADDTILEDINLPGRWIPKIIGGIGGLIRVGQYDQIPIEFGHTVIGTVLV  
GATPVNVIGRNLMTTRIGCTLNF  
>235731\_25 200.0  
PQITLWQRPFVTVKVGQTTEALLDTGADDTILEDIHLPGRWIPKIIGGIGGFIKVGQYDQIPIEFGHTVIGTVLV



GATPVNVIGRNLMTTRIGCTLNF  
>117039\_1 400.0  
PQITLWQRPLITVKIGGQLVEALMDTGADDTIFEGINLPGRWPKMIGGIGGFLNVRQYEQIPIEIGGHKILSTVL  
VGSTPVNVIGRNVMSKIGCTLNF  
>117039\_3 400.0  
PQITLWQRPFVITVKIGGQLVEALMDTGADDTIFEGINLPGRWPKMIGGIGGFLNVRQYEQIPIEIGGHKILSTVL  
VGSTPVNVIGRNVMSKIGCTLNF  
>235731\_177 200.0  
PQITLWQRPFVTVVGGQTTEALLDTGADDTILEDITLPGRWIPKIIIGGIGGLIRVGQYDQIPIEIFGHTVIGTVLV  
GATPVNVIGRNLMTTRIGCTLNF  
>235731\_179 200.0  
PQITLWQRPFVTVVGGQTTEALLDTGADDTILEDITLPGRWIPKIIIGGIGGLIRVGQYDQIPIEIFGQTVIGTVLV  
GATPVNVIGRNLMTTRIGCTLNF  
>205693\_0 200.0  
PQITLWQRPFIPVKIGGQQMEALLDTGADDTILEEINLPGRWTPKIVGGIGGFMRVGQYDQIPIEICGQKIIGTVL  
VGPTPANIIGRNVMTQIGCTLNF  
>205693\_1 200.0  
PQITLWQRPFIPVKIGGQQMEALLDTGADDTILEEINLPGRWTPKIVGGIGGFMRVGQYDQIPIEYGGQKIIGTVL  
VGPTPANIIGRNVMTQIGCTLNF  
>235685\_7 200.0  
PQITLWQRPFVTVKVGQTTEALLDTGADDTIFEDINLPGRWTPKIIIGGIGGLIKVGQYDQIPIEIFGLTVIGTVLV  
GATPVNVIGRNLMTTRIGCTLNF  
>235685\_10 200.0  
PQITLWQRPFVTVKVGQTTEALLDTGADDTIFEDINLPGRWTPKIIIGGIGGLIRVGQYDQIPIEIFGLTVIGTVLV  
GATPVNVIGRNLMTTRIGCTLNF  
>235685\_19 200.0  
PQITLWQRPFVTVKVGQTTEALLDTGADDTIFEDIHLPGRWTPKIIIGGIGGLIKVGQYDQIPIEIFGLTVIGTVLV  
GATPVNVIGRNLMTTRIGCTLNF  
>235685\_22 200.0  
PQITLWQRPFVTVKVGQTTEALLDTGADDTIFEDIHLPGRWTPKIIIGGIGGLIRVGQYDQIPIEIFGLTVIGTVLV  
GATPVNVIGRNLMTTRIGCTLNF  
>235685\_31 200.0  
PQITLWQRPFVTVVGGQTTEALLDTGADDTIFEDINLPGRWTPKIIIGGIGGLIKVGQYDQIPIEIFGLTVIGTVLV  
GATPVNVIGRNLMTTRIGCTLNF  
>235685\_34 200.0  
PQITLWQRPFVTVVGGQTTEALLDTGADDTIFEDINLPGRWTPKIIIGGIGGLIRVGQYDQIPIEIFGLTVIGTVLV  
GATPVNVIGRNLMTTRIGCTLNF  
>235685\_43 200.0  
PQITLWQRPFVTVVGGQTTEALLDTGADDTIFEDIHLPGRWTPKIIIGGIGGLIKVGQYDQIPIEIFGLTVIGTVLV  
GATPVNVIGRNLMTTRIGCTLNF  
>235685\_46 200.0  
PQITLWQRPFVTVVGGQTTEALLDTGADDTIFEDIHLPGRWTPKIIIGGIGGLIRVGQYDQIPIEIFGLTVIGTVLV  
GATPVNVIGRNLMTTRIGCTLNF  
>235731\_13 200.0  
PQITLWQRPFVTVKVGQTTEALLDTGADDTILEDINLPGRWTPKIIIGGIGGFIKVGQYDQIPIEIFGLTVIGTVLV  
GATPVNVIGRNLMTTRIGCTLNF  
>235731\_16 200.0  
PQITLWQRPFVTVKVGQTTEALLDTGADDTILEDINLPGRWTPKIIIGGIGGFIRVGQYDQIPIEIFGLTVIGTVLV  
GATPVNVIGRNLMTTRIGCTLNF  
>235731\_19 200.0  
PQITLWQRPFVTVKVGQTTEALLDTGADDTILEDINLPGRWTPKIIIGGIGGLIKVGQYDQIPIEIFGLTVIGTVLV  
GATPVNVIGRNLMTTRIGCTLNF  
>235731\_85 200.0  
PQITLWQRPFVTVKVGQTTEALLDTGADDTILEDITLPGRWTPKIIIGGIGGFIKVGQYDQIPIEIFGLTVIGTVLV  
GATPVNVIGRNLMTTRIGCTLNF  
>117039\_0 400.0  
PQITLWQRPLITVKIGGQLVEALMDTGADDTIFEGINLPGRWPKMIGGIGGFLNVRQYEQIPIEICGHKILSTVL  
VGSTPVNVIGRNVMSKIGCTLNF  
>117039\_2 400.0  
PQITLWQRPFVITVKIGGQLVEALMDTGADDTIFEGINLPGRWPKMIGGIGGFLNVRQYEQIPIEICGHKILSTVL  
VGSTPVNVIGRNVMSKIGCTLNF  
>117075\_0 400.0  
PQITLWQRPLITVKIGGQLVEALMDTGADDTIFEGINLPGRWPKMIGGIGGFLNVRQYEQIPIEICGHKILSTVL

VGSTPLNVIGRNVMSKIGCTLNF  
>117075\_1 400.0  
PQITLWQRPLITVKIGGQLVEALMDTGADDTIFEGINLPGRWPKMIGGIGGFLNVREYEQIPIEICGHKILSTVL  
VGSTPLNVIGRNVMSKIGCTLNF  
>117075\_2 400.0  
PQITLWQRPLITVKVGGQLVEALMDTGADDTIFEGINLPGRWPKMIGGIGGFLNVRQYEQIPIEICGHKILSTV  
LVGSTPLNVIGRNVMSKIGCTLNF  
>117075\_3 400.0  
PQITLWQRPLITVKVGGQLVEALMDTGADDTIFEGINLPGRWPKMIGGIGGFLNVREYEQIPIEICGHKILSTV  
LVGSTPLNVIGRNVMSKIGCTLNF  
>117075\_4 400.0  
PQITLWQRPFITVKIGGQLVEALMDTGADDTIFEGINLPGRWPKMIGGIGGFLNVRQYEQIPIEICGHKILSTVL  
VGSTPLNVIGRNVMSKIGCTLNF  
>117075\_5 400.0  
PQITLWQRPFITVKIGGQLVEALMDTGADDTIFEGINLPGRWPKMIGGIGGFLNVREYEQIPIEICGHKILSTVL  
VGSTPLNVIGRNVMSKIGCTLNF  
>117075\_6 400.0  
PQITLWQRPFITVKVGGQLVEALMDTGADDTIFEGINLPGRWPKMIGGIGGFLNVRQYEQIPIEICGHKILSTV  
LVGSTPLNVIGRNVMSKIGCTLNF  
>117075\_7 400.0  
PQITLWQRPFITVKVGGQLVEALMDTGADDTIFEGINLPGRWPKMIGGIGGFLNVREYEQIPIEICGHKILSTV  
LVGSTPLNVIGRNVMSKIGCTLNF  
>117075\_8 400.0  
PQITLWQRPVITVKIGGQLVEALMDTGADDTIFEGINLPGRWPKMIGGIGGFLNVRQYEQIPIEICGHKILSTVL  
VGSTPLNVIGRNVMSKIGCTLNF  
>117075\_9 400.0  
PQITLWQRPVITVKIGGQLVEALMDTGADDTIFEGINLPGRWPKMIGGIGGFLNVREYEQIPIEICGHKILSTVL  
VGSTPLNVIGRNVMSKIGCTLNF  
>117075\_10 400.0  
PQITLWQRPVITVKVGGQLVEALMDTGADDTIFEGINLPGRWPKMIGGIGGFLNVRQYEQIPIEICGHKILSTV  
LVGSTPLNVIGRNVMSKIGCTLNF  
>117075\_11 400.0  
PQITLWQRPVITVKVGGQLVEALMDTGADDTIFEGINLPGRWPKMIGGIGGFLNVREYEQIPIEICGHKILSTV  
LVGSTPLNVIGRNVMSKIGCTLNF  
>54177\_0 252.2  
PQITLWQRPVVTIKIGGQLIEALLDTGADDTVLEEINLPGRWPKKIIGGIGGFIKVRQYDQILIEICGHKVISTVVV  
GPTPVNAIGRNLLTQIGCTLNF  
>235731\_119 200.0  
PQITLWQRPFVTVVGGQTTEALLDTGADDTILEDINLPGRWTPKIIGGIGGLIRVGQYDQIPIEIFGQTVIGTVL  
VGATPVNVIGRNLMTQIGCTLNF  
>117133\_0 400.0  
PQITLWQRPVVVVKVGGQLMEALLDTGADDTIFEEMNLPGRWTPKIVGGIGGFMKVRYENVPIEYGGKILS  
TVLIGPTPANIIGRNVMTQIGCTLNF  
>117063\_1 400.0  
PQITLWQRPVVTVKAGQLREALLDTGADDTIFEEINLPGRWTPKIVGGIGGFMKVRYDQIPIEICGHKVISTV  
LVGPTPTNIIGGNLMTQIGCTLNF  
>98601\_0 400.0  
PQITLWQRPFVTIKIGGQLIEALLDTGADDTVLEEMNLPGRWPKKIIGGIGGFMKVRYDQIPIEICGHKVITTVL  
IGPTPVNAIGRNLLTQIGCTLNF  
>103779\_0 400.0  
PQITLWQRPIIKVKIGGQLVEALLDTGADDTILEGINLPGRWPKKIVGGIGGFMKVKEYDQIPVEICGHKIISTVLV  
GPTPVNIIGRNVMTQIGCTLNF  
>103779\_1 400.0  
PQITLWQRPIIKVKIGGQLVEALLDTGADDTILEGINLPGRWPKKIVGGIGGFMKVKEYDQIPVEICGHKIISTVLV  
GPTPVNVIGRNVMTQIGCTLNF  
>103779\_2 400.0  
PQITLWQRPIIKVKIGGQLVEALLDTGADDTILEGINLPGRWPKKIVGGIGGFMKVKEYDQIPVEICGHKVISTVL  
VGPTPVNIIGRNVMTQIGCTLNF  
>103779\_3 400.0  
PQITLWQRPIIKVKIGGQLVEALLDTGADDTILEGINLPGRWPKKIVGGIGGFMKVKEYDQIPVEICGHKVISTVL  
VGPTPVNVIGRNVMTQIGCTLNF  
>103779\_4 400.0  
PQITLWQRPIIKVKIGGQLVEALLDTGADDTILEGIDLPGRWPKKIVGGIGGFMKVKEYDQIPVEICGHKIISTVLV

GPTPVNIIGRNVMTQIGCTLNF  
>103779\_5 400.0  
PQITLWQRPIIKVKIGGQLVEALLDTGADDTILEGIDLPGRWPKPKIVGGIGGFMKVKEYDQIPVEICGHKIISTVL  
GPTPVNVIGRNVMTQIGCTLNF  
>103779\_6 400.0  
PQITLWQRPIIKVKIGGQLVEALLDTGADDTILEGIDLPGRWPKPKIVGGIGGFMKVKEYDQIPVEICGHKVISTVL  
VGPTPVNIIGRNVMTQIGCTLNF  
>103779\_7 400.0  
PQITLWQRPIIKVKIGGQLVEALLDTGADDTILEGIDLPGRWPKPKIVGGIGGFMKVKEYDQIPVEICGHKVISTVL  
VGPTPVNVIGRNVMTQIGCTLNF  
>103779\_8 400.0  
PQITLWQRPIIKVKIGGQLVEALLDTGADDTIFEGINLPGRWPKPKIVGGIGGFMKVKEYDQIPVEICGHKIISTVL  
VGPTPVNIIGRNVMTQIGCTLNF  
>103779\_9 400.0  
PQITLWQRPIIKVKIGGQLVEALLDTGADDTIFEGINLPGRWPKPKIVGGIGGFMKVKEYDQIPVEICGHKIISTVL  
VGPTPVNVIGRNVMTQIGCTLNF  
>103779\_10 400.0  
PQITLWQRPIIKVKIGGQLVEALLDTGADDTIFEGINLPGRWPKPKIVGGIGGFMKVKEYDQIPVEICGHKVISTVL  
VGPTPVNIIGRNVMTQIGCTLNF  
>103779\_11 400.0  
PQITLWQRPIIKVKIGGQLVEALLDTGADDTIFEGINLPGRWPKPKIVGGIGGFMKVKEYDQIPVEICGHKVISTVL  
VGPTPVNVIGRNVMTQIGCTLNF  
>103779\_12 400.0  
PQITLWQRPIIKVKIGGQLVEALLDTGADDTIFEGIDLPGRWPKPKIVGGIGGFMKVKEYDQIPVEICGHKIISTVL  
VGPTPVNIIGRNVMTQIGCTLNF  
>103779\_13 400.0  
PQITLWQRPIIKVKIGGQLVEALLDTGADDTIFEGIDLPGRWPKPKIVGGIGGFMKVKEYDQIPVEICGHKIISTVL  
VGPTPVNVIGRNVMTQIGCTLNF  
>103779\_14 400.0  
PQITLWQRPIIKVKIGGQLVEALLDTGADDTIFEGIDLPGRWPKPKIVGGIGGFMKVKEYDQIPVEICGHKVISTVL  
VGPTPVNIIGRNVMTQIGCTLNF  
>103779\_15 400.0  
PQITLWQRPIIKVKIGGQLVEALLDTGADDTIFEGIDLPGRWPKPKIVGGIGGFMKVKEYDQIPVEICGHKVISTVL  
VGPTPVNVIGRNVMTQIGCTLNF  
>147550\_0 400.0  
PQITLWQRPIIKVKIGGQLVEALLDTGADDTIFEGIDLPGRWPKPKIVGGIGGFMKVKEYDQIPVEICGHKVISTVL  
LVGPTPVNVIGRNVMTQIGCTLNF  
>113050\_0 400.0  
PQITLWQRPFVTVKIGGQITEALLDTGADDTILENINLPGRWPKPKIIGGIGFLKVRQYDQIPIEIEGHKIVIGSVV  
VGPTPVNVIGRNVMSQLGCTLNF  
>86742\_0 400.0  
PQITLWQRPFITIKIGGQLREALLDTGADDTIFEDIQLPGRWPKPKIVGGIGGFLKVKEYEQVPIEICGHKVISTVL  
TGPTPVNVIGRNVMTQLGCTLNF  
>86742\_1 400.0  
PQITLWQRPFITVKIGGQLREALLDTGADDTIFEDIQLPGRWPKPKIVGGIGGFLKVKEYEQVPIEICGHKVISTVL  
TGPTPVNVIGRNVMTQLGCTLNF  
>230072\_0 400.0  
PQITLWQRPVITVRVGGQLTEALLDTGADDTIFEEINLP GKWKPKLIGGIGGFLKVQYEQIPIEICEHTIMSTVL  
VGPTPVNVIGRNVMTQLGCTLNF  
>66194\_0 300.0  
PQITLWQRPVVDVKVGGQLMEALLDTGADDTIFEEMNLPGRWTPKPMVGGIGGFMKVRQYEDVPIEYGGKIL  
STVLIGPTPANIIGRNVMTQIGCTLNF  
>66194\_1 300.0  
PQITLWQRPVVDVKVGGQLMEALLDTGADDTIFEEMNLPGRWTPKPMVGGIGGFMKVRQYENVPIEYGGKIL  
STVLIGPTPANIIGRNVMTQIGCTLNF  
>66194\_2 300.0  
PQITLWQRPVVDVKVGGQLMEALLDTGADDTIFEEMNLPGRWTPKIVGGIGGFMKVRQYEDVPIEYGGKILS  
TVLIGPTPANIIGRNVMTQIGCTLNF  
>66194\_3 300.0  
PQITLWQRPVVDVKVGGQLMEALLDTGADDTIFEEMNLPGRWTPKIVGGIGGFMKVRQYENVPIEYGGKILS  
TVLIGPTPANIIGRNVMTQIGCTLNF  
>66194\_4 300.0  
PQITLWQRPVVDVKVGGQLMEALLDTGADDTIFEELNLPGRWTPKPMVGGIGGFMKVRQYEDVPIEYGGKILS

TVLIGPTPANIIGRNVMTQIGCTLNF  
>66194\_5 300.0  
PQITLWQRPVVDVKVGGQLMEALLDTGADDTIFEELNLPGRWTPKMVGGIGGFMKVRQYENVPIEYGGKILS  
TVLIGPTPANIIGRNVMTQIGCTLNF  
>66194\_6 300.0  
PQITLWQRPVVDVKVGGQLMEALLDTGADDTIFEELNLPGRWTPKIVGGIGGFMKVRQYEDVPIEYGGKILST  
VLIGPTPANIIGRNVMTQIGCTLNF  
>66194\_7 300.0  
PQITLWQRPVVDVKVGGQLMEALLDTGADDTIFEELNLPGRWTPKIVGGIGGFMKVRQYENVPIEYGGKILST  
VLIGPTPANIIGRNVMTQIGCTLNF  
>66194\_8 300.0  
PQITLWQRPVVDVKVGGQLMEALLDTGADDTIFEDMNLPGRWTPKMVGGIGGFMKVRQYEDVPIEYGGKIL  
STVLIGPTPANIIGRNVMTQIGCTLNF  
>66194\_9 300.0  
PQITLWQRPVVDVKVGGQLMEALLDTGADDTIFEDMNLPGRWTPKMVGGIGGFMKVRQYENVPIEYGGKIL  
STVLIGPTPANIIGRNVMTQIGCTLNF  
>66194\_10 300.0  
PQITLWQRPVVDVKVGGQLMEALLDTGADDTIFEDMNLPGRWTPKIVGGIGGFMKVRQYEDVPIEYGGKILS  
TVLIGPTPANIIGRNVMTQIGCTLNF  
>66194\_11 300.0  
PQITLWQRPVVDVKVGGQLMEALLDTGADDTIFEDMNLPGRWTPKIVGGIGGFMKVRQYENVPIEYGGKILS  
TVLIGPTPANIIGRNVMTQIGCTLNF  
>66194\_12 300.0  
PQITLWQRPVVDVKVGGQLMEALLDTGADDTIFEDLNLPGRWTPKMVGGIGGFMKVRQYEDVPIEYGGKILS  
TVLIGPTPANIIGRNVMTQIGCTLNF  
>66194\_13 300.0  
PQITLWQRPVVDVKVGGQLMEALLDTGADDTIFEDLNLPGRWTPKMVGGIGGFMKVRQYENVPIEYGGKILS  
TVLIGPTPANIIGRNVMTQIGCTLNF  
>66194\_14 300.0  
PQITLWQRPVVDVKVGGQLMEALLDTGADDTIFEDLNLPGRWTPKIVGGIGGFMKVRQYEDVPIEYGGKILS  
TVLIGPTPANIIGRNVMTQIGCTLNF  
>66194\_15 300.0  
PQITLWQRPVVDVKVGGQLMEALLDTGADDTIFEDLNLPGRWTPKIVGGIGGFMKVRQYENVPIEYGGKILS  
TVLIGPTPANIIGRNVMTQIGCTLNF  
>81805\_0 300.0  
PQITLWQRPVVDVKVGGQLREALLDTGADDTIFEDIDLPGRWTPKIIIGGIGGLMKVKQYEQIPIECGHELIGPVL  
VGPPTANVIGRNVMTQIGCTLNF  
>145212\_1 400.0  
PQITLWQRPVVDVKVGGQLKEALLDTGADDTIFEEMNLPGRWTPKLIIGGIGGFLKVRQYDQVPIECGHKVI  
LGPV  
LVGPTPANVIGRNLMSQIGCTLNF  
>145212\_3 400.0  
PQITLWQRPVVDVKVGGQLKEALLDTGADDTIFEEMNLPGRWTPKLIIGGIGGFLKVRQYDQVPIECGHKVI  
LGPV  
LVGPTPANVIGRNLMSQIGCTLNF  
>145212\_5 400.0  
PQITLWQRPVVDVKVGGQLKEALLDTGADDTIFEEMNLPGRWTPKLIIGGIGGFLKVRQYDQVPIECGHKVI  
LGPV  
LVGPTPANVIGRNLMSQIGCTLNF  
>145212\_7 400.0  
PQITLWQRPVVDVKVGGQLKEALLDTGADDTIFEEMNLPGRWTPKLIIGGIGGFLKVRQYDQVPIECGHKVI  
LGPV  
LVGPTPANVIGRNLMSQIGCTLNF  
>205630\_0 400.0  
PQITLWQRPVVDVKVGGQLTEALLDTGADDTIFEEMNLPGRWPKMVGIGGFIKVGQYDQIPIEFCGHKVIST  
VLIGPTPVNIIGRNVMTQIGCTLNF  
>205630\_1 400.0  
PQITLWQRPVVDVKVGGQLTEALLDTGADDTIFEEMNLPGRWPKMVGIGGFIKVGQYDQIPIEFCGHKVIST  
VLIGPTPVNIIGRNVMTQIGCTLNF  
>113060\_0 400.0  
PQITLWQRPVVDVKVGGQLREALLDTGADNTIFEEIDLPGRWPKIIGGIGGFLKVRQYDQIPIEVCGHKTTGT  
VLVGPVNIIGRNVMTQIGCTLNF  
>117063\_0 400.0  
PQITLWQRPVVDVKVGGQLREALLDTGADDTIFEEMNLPGRWTPKIVGGIGGFMKVRQYDQIPIEVCGHKVIST  
VLVGPVNIIGRNVMTQIGCTLNF  
>98603\_0 400.0  
PQITLWQRPVVDVKVGGQLKEALLDTGADDTIFEEMNLPGRWPKIIGGIGGFVKVRQYDQIPIEVCGHKVIST

VVGPTPVNAIGRNLLTQIGCTLNF

**Sequences for the FPV-susceptible ensemble**

>102782\_168 0.1

PQITLWQRPIVTIKVEGQLTEAPLDTGADDTVLEDVNLPGRWKPKMIGGLGGFIKVRQYDQIHIEICGHKAIGT  
VLVGPTPVNIIGRNMLTQIGCTLNF

>102782\_169 0.1

PQITLWQRPIVTIKVEGQLTEAPLDTGADDTVLEDVNLPGRWKPKMIGGLGGFIKVRQYDQIHIEICGHKAIGT  
VLVGPTPVNIIGRSMLTQIGCTLNF

>102782\_170 0.1

PQITLWQRPIVTIKVEGQLTEAPLDTGADDTVLEDVNLPGRWKPKMIGGLGGFIKVRQYDQIHIEICGHKAIGT  
VLIGPTPVNIIGRNMLTQIGCTLNF

>102782\_171 0.1

PQITLWQRPIVTIKVEGQLTEAPLDTGADDTVLEDVNLPGRWKPKMIGGLGGFIKVRQYDQIHIEICGHKAIGT  
VLIGPTPVNIIGRSMLTQIGCTLNF

>102782\_176 0.1

PQITLWQRPIVTIKVEGQLTEAPLDTGADDTVFEDMNLPGRWKPKMIGGLGGFIKVRQYDQIHIEICGHKAIGT  
VLVGPTPVNIIGRNMLTQIGCTLNF

>102782\_177 0.1

PQITLWQRPIVTIKVEGQLTEAPLDTGADDTVFEDMNLPGRWKPKMIGGLGGFIKVRQYDQIHIEICGHKAIGT  
VLVGPTPVNIIGRSMLTQIGCTLNF

>102782\_178 0.1

PQITLWQRPIVTIKVEGQLTEAPLDTGADDTVFEDMNLPGRWKPKMIGGLGGFIKVRQYDQIHIEICGHKAIGT  
VLIGPTPVNIIGRNMLTQIGCTLNF

>102782\_179 0.1

PQITLWQRPIVTIKVEGQLTEAPLDTGADDTVFEDMNLPGRWKPKMIGGLGGFIKVRQYDQIHIEICGHKAIGT  
VLIGPTPVNIIGRSMLTQIGCTLNF

>102782\_184 0.1

PQITLWQRPIVTIKVEGQLTEAPLDTGADDTVFEDVNLPGRWKPKMIGGLGGFIKVRQYDQIHIEICGHKAIGT  
VLVGPTPVNIIGRNMLTQIGCTLNF

>102782\_185 0.1

PQITLWQRPIVTIKVEGQLTEAPLDTGADDTVFEDVNLPGRWKPKMIGGLGGFIKVRQYDQIHIEICGHKAIGT  
VLVGPTPVNIIGRSMLTQIGCTLNF

>102782\_186 0.1

PQITLWQRPIVTIKVEGQLTEAPLDTGADDTVFEDVNLPGRWKPKMIGGLGGFIKVRQYDQIHIEICGHKAIGT  
VLIGPTPVNIIGRNMLTQIGCTLNF

>102782\_187 0.1

PQITLWQRPIVTIKVEGQLTEAPLDTGADDTVFEDVNLPGRWKPKMIGGLGGFIKVRQYDQIHIEICGHKAIGT  
VLIGPTPVNIIGRSMLTQIGCTLNF

>102782\_36 0.1

PQITLWQRPIVTIKVEGQLKEAPLDTGADDTVLEDMNLPGRWKPKMIGGLGGFIKVRQYDQIHIEICGHKVIKT  
VLVGPTPVNIIGRNMLTQIGCTLNF

>102782\_37 0.1

PQITLWQRPIVTIKVEGQLKEAPLDTGADDTVLEDMNLPGRWKPKMIGGLGGFIKVRQYDQIHIEICGHKVIKT  
VLVGPTPVNIIGRSMLTQIGCTLNF

>102782\_38 0.1

PQITLWQRPIVTIKVEGQLKEAPLDTGADDTVLEDMNLPGRWKPKMIGGLGGFIKVRQYDQIHIEICGHKVIKT  
VLIGPTPVNIIGRNMLTQIGCTLNF

>102782\_39 0.1

PQITLWQRPIVTIKVEGQLKEAPLDTGADDTVLEDMNLPGRWKPKMIGGLGGFIKVRQYDQIHIEICGHKVIKT  
VLIGPTPVNIIGRSMLTQIGCTLNF

>102782\_44 0.1

PQITLWQRPIVTIKVEGQLKEAPLDTGADDTVLEDVNLPGRWKPKMIGGLGGFIKVRQYDQIHIEICGHKVIKT  
VLVGPTPVNIIGRNMLTQIGCTLNF

>102782\_45 0.1

PQITLWQRPIVTIKVEGQLKEAPLDTGADDTVLEDVNLPGRWKPKMIGGLGGFIKVRQYDQIHIEICGHKVIKT  
VLVGPTPVNIIGRSMLTQIGCTLNF

>102782\_46 0.1

PQITLWQRPIVTIKVEGQLKEAPLDTGADDTVLEDVNLPGRWKPKMIGGLGGFIKVRQYDQIHIEICGHKVIKT  
VLIGPTPVNIIGRNMLTQIGCTLNF

>102782\_47 0.1

PQITLWQRPIVTIKVEGQLKEAPLDTGADDTVLEDVNLPGRWKPKMIGGLGGFIKVRQYDQIHIEICGHKVIKT  
VLIGPTPVNIIGRSMLTQIGCTLNF

>102782\_52 0.1  
PQITLWQRPIVTIKVEGQLKEAPLDTGADDTVFEDMNLPGRWKPKMIGGLGGFIKVRQYDQIHIEICGHKVIGT  
VLVGPTPVNIIGRNMLTQIGCTLNF

>102782\_53 0.1  
PQITLWQRPIVTIKVEGQLKEAPLDTGADDTVFEDMNLPGRWKPKMIGGLGGFIKVRQYDQIHIEICGHKVIGT  
VLVGPTPVNIIGRSMLTQIGCTLNF

>102782\_54 0.1  
PQITLWQRPIVTIKVEGQLKEAPLDTGADDTVFEDMNLPGRWKPKMIGGLGGFIKVRQYDQIHIEICGHKVIGT  
VLIGPTPVNIIGRNMLTQIGCTLNF

>102782\_55 0.1  
PQITLWQRPIVTIKVEGQLKEAPLDTGADDTVFEDMNLPGRWKPKMIGGLGGFIKVRQYDQIHIEICGHKVIGT  
VLIGPTPVNIIGRSMLTQIGCTLNF

>102782\_60 0.1  
PQITLWQRPIVTIKVEGQLKEAPLDTGADDTVFEDVNLPGRWKPKMIGGLGGFIKVRQYDQIHIEICGHKVIGT  
VLVGPTPVNIIGRNMLTQIGCTLNF

>102782\_61 0.1  
PQITLWQRPIVTIKVEGQLKEAPLDTGADDTVFEDVNLPGRWKPKMIGGLGGFIKVRQYDQIHIEICGHKVIGT  
VLVGPTPVNIIGRSMLTQIGCTLNF

>102782\_62 0.1  
PQITLWQRPIVTIKVEGQLKEAPLDTGADDTVFEDVNLPGRWKPKMIGGLGGFIKVRQYDQIHIEICGHKVIGT  
VLIGPTPVNIIGRNMLTQIGCTLNF

>102782\_63 0.1  
PQITLWQRPIVTIKVEGQLKEAPLDTGADDTVFEDVNLPGRWKPKMIGGLGGFIKVRQYDQIHIEICGHKVIGT  
VLIGPTPVNIIGRSMLTQIGCTLNF

>102782\_164 0.1  
PQITLWQRPIVTIKVEGQLTEAPLDTGADDTVLEDMNLPGRWKPKMIGGLGGFIKVRQYDQIHIEICGHKVIGT  
VLVGPTPVNIIGRNMLTQIGCTLNF

>102782\_64 0.1  
PQITLWQRPIVTIKVEGQLIEALLDTGADDTVLEDMNLPGRWKPKMIGGLGGFIKVRQYDQIHIEICGHKAIGTV  
LVGPTPVNIIGRNMLTQIGCTLNF

>102782\_65 0.1  
PQITLWQRPIVTIKVEGQLIEALLDTGADDTVLEDMNLPGRWKPKMIGGLGGFIKVRQYDQIHIEICGHKAIGTV  
LVGPTPVNIIGRSMLTQIGCTLNF

>102782\_66 0.1  
PQITLWQRPIVTIKVEGQLIEALLDTGADDTVLEDMNLPGRWKPKMIGGLGGFIKVRQYDQIHIEICGHKAIGTV  
LIGPTPVNIIGRNMLTQIGCTLNF

>102782\_67 0.1  
PQITLWQRPIVTIKVEGQLIEALLDTGADDTVLEDMNLPGRWKPKMIGGLGGFIKVRQYDQIHIEICGHKAIGTV  
LIGPTPVNIIGRSMLTQIGCTLNF

>102782\_72 0.1  
PQITLWQRPIVTIKVEGQLIEALLDTGADDTVLEDVNLPGRWKPKMIGGLGGFIKVRQYDQIHIEICGHKAIGTV  
LVGPTPVNIIGRNMLTQIGCTLNF

>102782\_73 0.1  
PQITLWQRPIVTIKVEGQLIEALLDTGADDTVLEDVNLPGRWKPKMIGGLGGFIKVRQYDQIHIEICGHKAIGTV  
LVGPTPVNIIGRSMLTQIGCTLNF

>102782\_74 0.1  
PQITLWQRPIVTIKVEGQLIEALLDTGADDTVLEDVNLPGRWKPKMIGGLGGFIKVRQYDQIHIEICGHKAIGTV  
LIGPTPVNIIGRNMLTQIGCTLNF

>102782\_75 0.1  
PQITLWQRPIVTIKVEGQLIEALLDTGADDTVLEDVNLPGRWKPKMIGGLGGFIKVRQYDQIHIEICGHKAIGTV  
LIGPTPVNIIGRSMLTQIGCTLNF

>102782\_80 0.1  
PQITLWQRPIVTIKVEGQLIEALLDTGADDTVFEDMNLPGRWKPKMIGGLGGFIKVRQYDQIHIEICGHKAIGTV  
LVGPTPVNIIGRNMLTQIGCTLNF

>102782\_81 0.1  
PQITLWQRPIVTIKVEGQLIEALLDTGADDTVFEDMNLPGRWKPKMIGGLGGFIKVRQYDQIHIEICGHKAIGTV  
LVGPTPVNIIGRSMLTQIGCTLNF

>102782\_82 0.1  
PQITLWQRPIVTIKVEGQLIEALLDTGADDTVFEDMNLPGRWKPKMIGGLGGFIKVRQYDQIHIEICGHKAIGTV  
LIGPTPVNIIGRNMLTQIGCTLNF

>102782\_83 0.1  
PQITLWQRPIVTIKVEGQLIEALLDTGADDTVFEDMNLPGRWKPKMIGGLGGFIKVRQYDQIHIEICGHKAIGTV  
LIGPTPVNIIGRSMLTQIGCTLNF

>102782\_88 0.1  
PQITLWQRPIVTIKVEGQLIEALLDTGADDTVFEDVNLPGRWKPKMIGGLGGFIKVRQYDQIHIEICGHKAIGTV  
LVGPTPVNIIGRNMLTQIGCTLNF  
>102782\_89 0.1  
PQITLWQRPIVTIKVEGQLIEALLDTGADDTVFEDVNLPGRWKPKMIGGLGGFIKVRQYDQIHIEICGHKAIGTV  
LVGPTPVNIIGRSMLTQIGCTLNF  
>102782\_90 0.1  
PQITLWQRPIVTIKVEGQLIEALLDTGADDTVFEDVNLPGRWKPKMIGGLGGFIKVRQYDQIHIEICGHKAIGTV  
LIGPTPVNIIGRNMLTQIGCTLNF  
>102782\_91 0.1  
PQITLWQRPIVTIKVEGQLIEALLDTGADDTVFEDVNLPGRWKPKMIGGLGGFIKVRQYDQIHIEICGHKAIGTV  
LIGPTPVNIIGRSMLTQIGCTLNF  
>102782\_68 0.1  
PQITLWQRPIVTIKVEGQLIEALLDTGADDTVLEDNMNLPGRWKPKMIGGLGGFIKVRQYDQIHIEICGHKVIIGTV  
LVGPTPVNIIGRNMLTQIGCTLNF  
>102782\_69 0.1  
PQITLWQRPIVTIKVEGQLIEALLDTGADDTVLEDNMNLPGRWKPKMIGGLGGFIKVRQYDQIHIEICGHKVIIGTV  
LVGPTPVNIIGRSMLTQIGCTLNF  
>102782\_70 0.1  
PQITLWQRPIVTIKVEGQLIEALLDTGADDTVLEDNMNLPGRWKPKMIGGLGGFIKVRQYDQIHIEICGHKVIIGTV  
LIGPTPVNIIGRNMLTQIGCTLNF  
>102782\_71 0.1  
PQITLWQRPIVTIKVEGQLIEALLDTGADDTVLEDNMNLPGRWKPKMIGGLGGFIKVRQYDQIHIEICGHKVIIGTV  
LIGPTPVNIIGRSMLTQIGCTLNF  
>102782\_76 0.1  
PQITLWQRPIVTIKVEGQLIEALLDTGADDTVLEDVNLPGRWKPKMIGGLGGFIKVRQYDQIHIEICGHKVIIGTV  
LVGPTPVNIIGRNMLTQIGCTLNF  
>102782\_77 0.1  
PQITLWQRPIVTIKVEGQLIEALLDTGADDTVLEDVNLPGRWKPKMIGGLGGFIKVRQYDQIHIEICGHKVIIGTV  
LVGPTPVNIIGRSMLTQIGCTLNF  
>102782\_78 0.1  
PQITLWQRPIVTIKVEGQLIEALLDTGADDTVLEDVNLPGRWKPKMIGGLGGFIKVRQYDQIHIEICGHKVIIGTV  
LIGPTPVNIIGRNMLTQIGCTLNF  
>102782\_79 0.1  
PQITLWQRPIVTIKVEGQLIEALLDTGADDTVLEDVNLPGRWKPKMIGGLGGFIKVRQYDQIHIEICGHKVIIGTV  
LIGPTPVNIIGRSMLTQIGCTLNF  
>102782\_84 0.1  
PQITLWQRPIVTIKVEGQLIEALLDTGADDTVFEDNMNLPGRWKPKMIGGLGGFIKVRQYDQIHIEICGHKVIIGTV  
LVGPTPVNIIGRNMLTQIGCTLNF  
>102782\_85 0.1  
PQITLWQRPIVTIKVEGQLIEALLDTGADDTVFEDNMNLPGRWKPKMIGGLGGFIKVRQYDQIHIEICGHKVIIGTV  
LVGPTPVNIIGRSMLTQIGCTLNF  
>102782\_86 0.1  
PQITLWQRPIVTIKVEGQLIEALLDTGADDTVFEDNMNLPGRWKPKMIGGLGGFIKVRQYDQIHIEICGHKVIIGTV  
LIGPTPVNIIGRNMLTQIGCTLNF  
>102782\_87 0.1  
PQITLWQRPIVTIKVEGQLIEALLDTGADDTVFEDNMNLPGRWKPKMIGGLGGFIKVRQYDQIHIEICGHKVIIGTV  
LIGPTPVNIIGRSMLTQIGCTLNF  
>102782\_92 0.1  
PQITLWQRPIVTIKVEGQLIEALLDTGADDTVFEDVNLPGRWKPKMIGGLGGFIKVRQYDQIHIEICGHKVIIGTV  
LVGPTPVNIIGRNMLTQIGCTLNF  
>102782\_93 0.1  
PQITLWQRPIVTIKVEGQLIEALLDTGADDTVFEDVNLPGRWKPKMIGGLGGFIKVRQYDQIHIEICGHKVIIGTV  
LVGPTPVNIIGRSMLTQIGCTLNF  
>102782\_94 0.1  
PQITLWQRPIVTIKVEGQLIEALLDTGADDTVFEDVNLPGRWKPKMIGGLGGFIKVRQYDQIHIEICGHKVIIGTV  
LIGPTPVNIIGRNMLTQIGCTLNF  
>102782\_95 0.1  
PQITLWQRPIVTIKVEGQLIEALLDTGADDTVFEDVNLPGRWKPKMIGGLGGFIKVRQYDQIHIEICGHKVIIGTV  
LIGPTPVNIIGRSMLTQIGCTLNF  
>102782\_4 0.1  
PQITLWQRPIVTIKVEGQLKEALLDTGADDTVLEDNMNLPGRWKPKMIGGLGGFIKVRQYDQIHIEICGHKVIIGTV  
VLVGPPTVNIIGRNMLTQIGCTLNF

>102782\_5 0.1  
PQITLWQRPIVTIKVEGQLKEALLDTGADDTVLEDNMLPGRWPKPKMIGGLGGFIKVRQYDQIHIEICGHKVIGT  
VLVGPTPVNIIGRSMLTQIGCTLNF

>102782\_6 0.1  
PQITLWQRPIVTIKVEGQLKEALLDTGADDTVLEDNMLPGRWPKPKMIGGLGGFIKVRQYDQIHIEICGHKVIGT  
VLIGPTPVNIIGRNMLTQIGCTLNF

>102782\_7 0.1  
PQITLWQRPIVTIKVEGQLKEALLDTGADDTVLEDNMLPGRWPKPKMIGGLGGFIKVRQYDQIHIEICGHKVIGT  
VLIGPTPVNIIGRSMLTQIGCTLNF

>102782\_12 0.1  
PQITLWQRPIVTIKVEGQLKEALLDTGADDTVLEDNMLPGRWPKPKMIGGLGGFIKVRQYDQIHIEICGHKVIGT  
VLVGPTPVNIIGRNMLTQIGCTLNF

>102782\_13 0.1  
PQITLWQRPIVTIKVEGQLKEALLDTGADDTVLEDNMLPGRWPKPKMIGGLGGFIKVRQYDQIHIEICGHKVIGT  
VLVGPTPVNIIGRSMLTQIGCTLNF

>102782\_14 0.1  
PQITLWQRPIVTIKVEGQLKEALLDTGADDTVLEDNMLPGRWPKPKMIGGLGGFIKVRQYDQIHIEICGHKVIGT  
VLIGPTPVNIIGRNMLTQIGCTLNF

>102782\_15 0.1  
PQITLWQRPIVTIKVEGQLKEALLDTGADDTVLEDNMLPGRWPKPKMIGGLGGFIKVRQYDQIHIEICGHKVIGT  
VLIGPTPVNIIGRSMLTQIGCTLNF

>102782\_20 0.1  
PQITLWQRPIVTIKVEGQLKEALLDTGADDTVFEDNMLPGRWPKPKMIGGLGGFIKVRQYDQIHIEICGHKVIGT  
VLVGPTPVNIIGRNMLTQIGCTLNF

>102782\_21 0.1  
PQITLWQRPIVTIKVEGQLKEALLDTGADDTVFEDNMLPGRWPKPKMIGGLGGFIKVRQYDQIHIEICGHKVIGT  
VLVGPTPVNIIGRSMLTQIGCTLNF

>102782\_22 0.1  
PQITLWQRPIVTIKVEGQLKEALLDTGADDTVFEDNMLPGRWPKPKMIGGLGGFIKVRQYDQIHIEICGHKVIGT  
VLIGPTPVNIIGRNMLTQIGCTLNF

>102782\_23 0.1  
PQITLWQRPIVTIKVEGQLKEALLDTGADDTVFEDNMLPGRWPKPKMIGGLGGFIKVRQYDQIHIEICGHKVIGT  
VLIGPTPVNIIGRSMLTQIGCTLNF

>102782\_30 0.1  
PQITLWQRPIVTIKVEGQLKEALLDTGADDTVFEDNMLPGRWPKPKMIGGLGGFIKVRQYDQIHIEICGHKVIGT  
VLIGPTPVNIIGRNMLTQIGCTLNF

>102782\_31 0.1  
PQITLWQRPIVTIKVEGQLKEALLDTGADDTVFEDNMLPGRWPKPKMIGGLGGFIKVRQYDQIHIEICGHKVIGT  
VLIGPTPVNIIGRSMLTQIGCTLNF

>102782\_132 0.1  
PQITLWQRPIVTIKVEGQLTEALLDTGADDTVLEDNMLPGRWPKPKMIGGLGGFIKVRQYDQIHIEICGHKVIGT  
VLVGPTPVNIIGRNMLTQIGCTLNF

>102782\_133 0.1  
PQITLWQRPIVTIKVEGQLTEALLDTGADDTVLEDNMLPGRWPKPKMIGGLGGFIKVRQYDQIHIEICGHKVIGT  
VLVGPTPVNIIGRSMLTQIGCTLNF

>102782\_134 0.1  
PQITLWQRPIVTIKVEGQLTEALLDTGADDTVLEDNMLPGRWPKPKMIGGLGGFIKVRQYDQIHIEICGHKVIGT  
VLIGPTPVNIIGRNMLTQIGCTLNF

>102782\_135 0.1  
PQITLWQRPIVTIKVEGQLTEALLDTGADDTVLEDNMLPGRWPKPKMIGGLGGFIKVRQYDQIHIEICGHKVIGT  
VLIGPTPVNIIGRSMLTQIGCTLNF

>102782\_140 0.1  
PQITLWQRPIVTIKVEGQLTEALLDTGADDTVLEDNMLPGRWPKPKMIGGLGGFIKVRQYDQIHIEICGHKVIGTV  
LVGPTPVNIIGRNMLTQIGCTLNF

>102782\_141 0.1  
PQITLWQRPIVTIKVEGQLTEALLDTGADDTVLEDNMLPGRWPKPKMIGGLGGFIKVRQYDQIHIEICGHKVIGTV  
LVGPTPVNIIGRSMLTQIGCTLNF

>102782\_142 0.1  
PQITLWQRPIVTIKVEGQLTEALLDTGADDTVLEDNMLPGRWPKPKMIGGLGGFIKVRQYDQIHIEICGHKVIGTV  
LIGPTPVNIIGRNMLTQIGCTLNF

>102782\_143 0.1  
PQITLWQRPIVTIKVEGQLTEALLDTGADDTVLEDNMLPGRWPKPKMIGGLGGFIKVRQYDQIHIEICGHKVIGTV  
LIGPTPVNIIGRSMLTQIGCTLNF



>102782\_148 0.1  
PQITLWQRPIVTIKVEGQLTEALLDTGADDTVFEDMNLPGRWKPKMIGGLGGFIKVRQYDQIHIEICGHKVI  
VLVGPTPVNIIGRNMLTQIGCTLNF  
>102782\_149 0.1  
PQITLWQRPIVTIKVEGQLTEALLDTGADDTVFEDMNLPGRWKPKMIGGLGGFIKVRQYDQIHIEICGHKVI  
VLVGPTPVNIIGRSMLTQIGCTLNF  
>102782\_150 0.1  
PQITLWQRPIVTIKVEGQLTEALLDTGADDTVFEDMNLPGRWKPKMIGGLGGFIKVRQYDQIHIEICGHKVI  
VLIGPTPVNIIGRNMLTQIGCTLNF  
>102782\_151 0.1  
PQITLWQRPIVTIKVEGQLTEALLDTGADDTVFEDMNLPGRWKPKMIGGLGGFIKVRQYDQIHIEICGHKVI  
VLIGPTPVNIIGRSMLTQIGCTLNF  
>102782\_2 0.1  
PQITLWQRPIVTIKVEGQLKEALLDTGADDTVLEDMNLPGRWKPKMIGGLGGFIKVRQYDQIHIEICGHKAIG  
VLIGPTPVNIIGRNMLTQIGCTLNF  
>102782\_3 0.1  
PQITLWQRPIVTIKVEGQLKEALLDTGADDTVLEDMNLPGRWKPKMIGGLGGFIKVRQYDQIHIEICGHKAIG  
VLIGPTPVNIIGRSMLTQIGCTLNF  
>102782\_8 0.1  
PQITLWQRPIVTIKVEGQLKEALLDTGADDTVLEDVNLPGRWKPKMIGGLGGFIKVRQYDQIHIEICGHKAIG  
VLVGPTPVNIIGRNMLTQIGCTLNF  
>102782\_10 0.1  
PQITLWQRPIVTIKVEGQLKEALLDTGADDTVLEDVNLPGRWKPKMIGGLGGFIKVRQYDQIHIEICGHKAIG  
VLIGPTPVNIIGRNMLTQIGCTLNF  
>102782\_11 0.1  
PQITLWQRPIVTIKVEGQLKEALLDTGADDTVLEDVNLPGRWKPKMIGGLGGFIKVRQYDQIHIEICGHKAIG  
VLIGPTPVNIIGRSMLTQIGCTLNF  
>102782\_16 0.1  
PQITLWQRPIVTIKVEGQLKEALLDTGADDTVFEDMNLPGRWKPKMIGGLGGFIKVRQYDQIHIEICGHKAIG  
VLVGPTPVNIIGRNMLTQIGCTLNF  
>102782\_17 0.1  
PQITLWQRPIVTIKVEGQLKEALLDTGADDTVFEDMNLPGRWKPKMIGGLGGFIKVRQYDQIHIEICGHKAIG  
VLVGPTPVNIIGRSMLTQIGCTLNF  
>102782\_18 0.1  
PQITLWQRPIVTIKVEGQLKEALLDTGADDTVFEDMNLPGRWKPKMIGGLGGFIKVRQYDQIHIEICGHKAIG  
VLIGPTPVNIIGRNMLTQIGCTLNF  
>102782\_19 0.1  
PQITLWQRPIVTIKVEGQLKEALLDTGADDTVFEDMNLPGRWKPKMIGGLGGFIKVRQYDQIHIEICGHKAIG  
VLIGPTPVNIIGRSMLTQIGCTLNF  
>102782\_24 0.1  
PQITLWQRPIVTIKVEGQLKEALLDTGADDTVFEDVNLPGRWKPKMIGGLGGFIKVRQYDQIHIEICGHKAIG  
VLVGPTPVNIIGRNMLTQIGCTLNF  
>102782\_25 0.1  
PQITLWQRPIVTIKVEGQLKEALLDTGADDTVFEDVNLPGRWKPKMIGGLGGFIKVRQYDQIHIEICGHKAIG  
VLVGPTPVNIIGRSMLTQIGCTLNF  
>102782\_26 0.1  
PQITLWQRPIVTIKVEGQLKEALLDTGADDTVFEDVNLPGRWKPKMIGGLGGFIKVRQYDQIHIEICGHKAIG  
VLIGPTPVNIIGRNMLTQIGCTLNF  
>13255\_0 0.1  
PQITLWQRPLVTIKIGGQLKEALLDTGADDTVLEEMNLPGRWKPKMIGGIGGFVKVQYDQILIEICGHKAIGTV  
LVGPTPVNIIGRSLLTQIGCTLNF

**Sequences for the IDV-resistant ensemble**

>144045\_0 500.0  
PQITLWQRPFIPVKVGGQPIEALLDTGADDTVLEGINLPGRWKPKIIGGIGGFVKVRQYDQIPIEICGHKVLSTV  
LVGPTPVNVIGRNMLTQLGCTLNF  
>102993\_0 500.0  
PQIALWQRPIVTIKVGGQLIEALLDTGADDTVLEDINLPGRWKPKIIGGIGGFVKVKEYENVPIEICGHKATCSV  
LVGPTPFNIIGRNMLTKIGCTLNF  
>102993\_1 500.0  
PQIALWQRPIVTIKVGGQLIEALLDTGADDTVLENINLPGRWKPKIIGGIGGFVKVKEYENVPIEICGHKATCSV  
LVGPTPFNIIGRNMLTKIGCTLNF  
>116523\_0 500.0

PQITLWQRPVVTIKIGGQLKEALLDTGADDTVLEEMDLPGRWPKPKMILGIGGFSKVRQYDQVPIEICGYKVIGS  
VLIGPTPANIIGRNLLTQLGCTLNF  
>116523\_1 500.0  
PQITLWQRPVVTIKIGGQLKEALLDTGADDTVLEEMDLPGRWPKPKMILGIGGYSKVRQYDQVPIEICGYKVIGS  
VLIGPTPANIIGRNLLTQLGCTLNF  
>116523\_2 500.0  
PQITLWQRPVVTIKIGGQLKEALLDTGADDTVLEEMDLPGRWPKPKMIVGIGGFSKVRQYDQVPIEICGYKVIGS  
VLIGPTPANIIGRNLLTQLGCTLNF  
>116523\_3 500.0  
PQITLWQRPVVTIKIGGQLKEALLDTGADDTVLEEMDLPGRWPKPKMIVGIGGYSKVRQYDQVPIEICGYKVIGS  
VLIGPTPANIIGRNLLTQLGCTLNF  
>116523\_4 500.0  
PQITLWQRPVVTIKIGGQLKEALLDTGADDTVLEEMDLPGRWPKPKIILGIGGFSKVRQYDQVPIEICGYKVIGSV  
LIGPTPANIIGRNLLTQLGCTLNF  
>116523\_5 500.0  
PQITLWQRPVVTIKIGGQLKEALLDTGADDTVLEEMDLPGRWPKPKIILGIGGYSKVRQYDQVPIEICGYKVIGSV  
LIGPTPANIIGRNLLTQLGCTLNF  
>116523\_6 500.0  
PQITLWQRPVVTIKIGGQLKEALLDTGADDTVLEEMDLPGRWPKPKIIVGIGGFSKVRQYDQVPIEICGYKVIGS  
VLIGPTPANIIGRNLLTQLGCTLNF  
>116523\_7 500.0  
PQITLWQRPVVTIKIGGQLKEALLDTGADDTVLEEMDLPGRWPKPKIIVGIGGYSKVRQYDQVPIEICGYKVIGS  
VLIGPTPANIIGRNLLTQLGCTLNF  
>116523\_8 500.0  
PQITLWQRPVVTIKIGGQLKEALLDTGADDTVLEEMDLPGRWTPKMILGIGGFSKVRQYDQVPIEICGYKVIGS  
VLIGPTPANIIGRNLLTQLGCTLNF  
>116523\_9 500.0  
PQITLWQRPVVTIKIGGQLKEALLDTGADDTVLEEMDLPGRWTPKMILGIGGYSKVRQYDQVPIEICGYKVIGS  
VLIGPTPANIIGRNLLTQLGCTLNF  
>116523\_10 500.0  
PQITLWQRPVVTIKIGGQLKEALLDTGADDTVLEEMDLPGRWTPKMIVGIGGFSKVRQYDQVPIEICGYKVIGS  
VLIGPTPANIIGRNLLTQLGCTLNF  
>116523\_11 500.0  
PQITLWQRPVVTIKIGGQLKEALLDTGADDTVLEEMDLPGRWTPKMIVGIGGYSKVRQYDQVPIEICGYKVIGS  
VLIGPTPANIIGRNLLTQLGCTLNF  
>116523\_12 500.0  
PQITLWQRPVVTIKIGGQLKEALLDTGADDTVLEEMDLPGRWTPKIILGIGGFSKVRQYDQVPIEICGYKVIGSV  
LIGPTPANIIGRNLLTQLGCTLNF  
>116523\_13 500.0  
PQITLWQRPVVTIKIGGQLKEALLDTGADDTVLEEMDLPGRWTPKIILGIGGYSKVRQYDQVPIEICGYKVIGSV  
LIGPTPANIIGRNLLTQLGCTLNF  
>116523\_14 500.0  
PQITLWQRPVVTIKIGGQLKEALLDTGADDTVLEEMDLPGRWTPKIIVGIGGFSKVRQYDQVPIEICGYKVIGSV  
LIGPTPANIIGRNLLTQLGCTLNF  
>116523\_15 500.0  
PQITLWQRPVVTIKIGGQLKEALLDTGADDTVLEEMDLPGRWTPKIIVGIGGYSKVRQYDQVPIEICGYKVIGS  
VLIGPTPANIIGRNLLTQLGCTLNF  
>81917\_0 500.0  
PQITLWQRPVVTIKIGGQLKEALLDTGADDTVLEEMNLPGRWTPKMIVGIGGFTKVRQYDQVLEICGHKVIGSV  
LIGPTPANIIGRNLLTQIGCTLNF  
>81917\_1 500.0  
PQITLWQRPVVTIKIGGQLKEALLDTGADDTVLEEMNLPGRWTPKMIVGIGGFTKVRQYDQVLEICGHKVIGS  
VLIGPTPANIIGRNLLTQIGCTLNF  
>54177\_0 400.0  
PQITLWQRPVVTIKIGGQLIEALLDTGADDTVLEEINLPGRWPKPKIIGGIGGFVKVRQYDQVLEICGHKVISTVVV  
GPTPVNAIGRNLLTQIGCTLNF  
>103057\_1 500.0  
PQITLWQRPVVTIKIGGQLREALLDTGADDTVFEDELPGRWTPKIIGGIGGFVKVKQYEEVPIECEHKTSTTVL  
VGPTPFNIIGRNLMTQLGCTLNF  
>103057\_3 500.0  
PQITLWQRPVVTIKIGGQLREALLDTGADDTVFEDELPGRWTPKIIGGIGGFVKVKQYEEVPIECEHKTSTTV  
LVGPTPFNIIGRNLMTQLGCTLNF  
>78924\_3 500.0

PQITLWQRPVVTIKIGGQIKEALLDTGADDTVLEEMNLPGRWPKLIVGIGGYAKVREYEEVPIEICGHKVVGS  
VLIGPTPTNIIGRNLMTQLGCTLNF  
>78924\_7 500.0  
PQITLWQRPVVKIKIGGQIKEALLDTGADDTVLEEMNLPGRWPKLIVGIGGYAKVREYEEVPIEICGHKVVGS  
VLIGPTPTNIIGRNLMTQLGCTLNF  
>81911\_4 500.0  
PQITLWQRPVIVPVKIGGQQIEALLDTGADDTVLEDINLPGRWPKKIIGGIGGFVKVRQYDQVPVEICGHKVVGT  
VVVGPTPFNIIGRNLMTQIGCTLNF  
>81911\_5 500.0  
PQITLWQRPVIVPVKIGGQQIEALLDTGADDTVLEDINLPGRWPKKIIGGIGGFVKVKQYDQVPVEICGHKVVGT  
VVVGPTPFNIIGRNLMTQIGCTLNF  
>81911\_6 500.0  
PQITLWQRPVIVPVKVGQQIEALLDTGADDTVLEDINLPGRWPKKIIGGIGGFVKVRQYDQVPVEICGHKVVG  
TVVGPTPFNIIGRNLMTQIGCTLNF  
>81911\_7 500.0  
PQITLWQRPVIVPVKVGQQIEALLDTGADDTVLEDINLPGRWPKKIIGGIGGFVKVKQYDQVPVEICGHKVVGT  
VVVGPTPFNIIGRNLMTQIGCTLNF  
>61115\_0 400.0  
PQITLWQRPITVKIGGQTREVLDDTADDTVIEDIDLPGRWKPKLIGGIGGFVKVREYNQVPIEICGHKVLSTVL  
VGPTPVNVIGRNLMTQIGCTLNF  
>61115\_1 400.0  
PQITLWQRPITVKIGGQTREVLDDTADDTVIEDIDLPGRWKPKLIGGIGGFVKVREYNQVPIEICGHKVVSTV  
LVGPTPVNVIGRNLMTQIGCTLNF  
>61115\_2 400.0  
PQITLWQRPITVKIGGQTREVLDDTADDTVIEDIDLPGRWKPKLIGGIGGFVKVREYNQVPIEICGRKVLSTVL  
VGPTPVNVIGRNLMTQIGCTLNF  
>61115\_3 400.0  
PQITLWQRPITVKIGGQTREVLDDTADDTVIEDIDLPGRWKPKLIGGIGGFVKVREYNQVPIEICGRKVVSTV  
LVGPTPVNVIGRNLMTQIGCTLNF  
>78924\_2 500.0  
PQITLWQRPVVTIKIGGQIKEALLDTGADDTVLEEMNLPGRWPKLIVGIGGYAKVREYEEVPIEICGHKVVGS  
VLIGPTPANIIGRNLMTQLGCTLNF  
>78924\_6 500.0  
PQITLWQRPVVKIKIGGQIKEALLDTGADDTVLEEMNLPGRWPKLIVGIGGYAKVREYEEVPIEICGHKVVGS  
VLIGPTPANIIGRNLMTQLGCTLNF  
>117023\_0 500.0  
PQITLWQRPVITIKIGGQLREALLDTGADDTVLEDIELPGRWPKMIVGVGGFAKVRQYDQVPVEICGHKVVGT  
VLVGPTPANIIGRNLMTQLGCTLNF  
>117023\_1 500.0  
PQITLWQRPVITIKIGGQLREALLDTGADDTVLEDIELPGRWPKMIVGVGGFAKVKQYDQVPVEICGHKVVGT  
VLVGPTPANIIGRNLMTQLGCTLNF  
>86640\_0 500.0  
PQITLWQRPVFTMKIGGQLIEALLDTGADDTVLEEIDLPGRWKPKKIIGGIGGFVKVRQYDQVPVEIFGHKTTTTV  
LVGPTPVNVIGRNLMTQLGCTLNF  
>86640\_1 500.0  
PQITLWQRPVFTMKIGGQLIEALLDTGADDTVLEEIDLPGRWKPKKIIGGIGGFVKVRQYDQVPVEIFGHKTTTT  
VLVGPTPVNVIGRNLMTQLGCTLNF  
>86890\_0 500.0  
PQITLWQRPVITIKVGGQLKEALLDTGADDTVFQELDLPGRWKPKLIVGIGGFTKVRQYDQVPVEICGHKVVGD  
ILVGPTPANIIGRNLMTQLGCTLNF  
>86890\_1 500.0  
PQITLWQRPVITIKVGGQLKEALLDTGADDTVFQELDLPGKWKPKLIVGIGGFTKVRQYDQVPVEICGHKVVGD  
ILVGPTPANIIGRNLMTQLGCTLNF  
>86890\_2 500.0  
PQITLWQRPVITVKVGGQLKEALLDTGADDTVFQELDLPGRWKPKLIVGIGGFTKVRQYDQVPVEICGHKVVG  
DILVGPTPANIIGRNLMTQLGCTLNF  
>86890\_3 500.0  
PQITLWQRPVITVKVGGQLKEALLDTGADDTVFQELDLPGKWKPKLIVGIGGFTKVRQYDQVPVEICGHKVVG  
DILVGPTPANIIGRNLMTQLGCTLNF  
>86890\_4 500.0  
PQITLWQRPVVTIKVGGQLKEALLDTGADDTVFQELDLPGRWKPKLIVGIGGFTKVRQYDQVPVEICGHKVVG  
DILVGPTPANIIGRNLMTQLGCTLNF  
>86890\_5 500.0

PQITLWQRPVVTIKVGGQLKEALLDTGADDTVFQELDLP GKWKPKLIVGIGGFTKVRQYDQVPIEICGHKVVG  
DILVGPTPANIIGRNLM TQLGCTLNF  
>86890\_6 500.0  
PQITLWQRPVVTIKVGGQLKEALLDTGADDTVFQELDLPGRWKPKLIVGIGGFTKVRQYDQVPIEICGHKVV  
GDILVGPTPANIIGRNLM TQLGCTLNF  
>86890\_7 500.0  
PQITLWQRPVVTIKVGGQLKEALLDTGADDTVFQELDLP GKWKPKLIVGIGGFTKVRQYDQVPIEICGHKVV  
GDILVGPTPANIIGRNLM TQLGCTLNF  
>117033\_1 500.0  
PQITLWQRPVVTIKIGGQIREALLDTGADDTVLEDINLPGRWKPKLIVGIGGFSKVKEYDQVPIEICGHKVVGT  
VGPTPANIIGRNLLTQLGCTLNF  
>117033\_2 500.0  
PQITLWQRPVVTIKIGGQIREALLDTGADDTVLEDINLPGRWKPKLIVGIGGFTKVKEYDQVPIEICGHKVVGT  
VGPTPANIIGRNLLTQLGCTLNF  
>117033\_4 500.0  
PQITLWQRPVVTIKIGGQIREALLDTGADDTVLEDINLPGRWEPK LIVGIGGFSKVKEYDQVPIEICGHKVVGT  
VGPTPANIIGRNLLTQLGCTLNF  
>117033\_5 500.0  
PQITLWQRPVVTIKIGGQIREALLDTGADDTVLEDINLPGRWEPK LIVGIGGFTKVKEYDQVPIEICGHKVVGT  
VGPTPANIIGRNLLTQLGCTLNF  
>147553\_0 500.0  
PQITLWQRPVVTIKIGGQLREALLDTGADDTVFTDIDL PGRWTPKIIVGVGGFSKVKEYDQVPIEICGHKVVGT  
LIGPTPANIVGRNLLTQLGCTLNF  
>103057\_0 500.0  
PQITLWQRPVVTIKIGGQLREALLDTGADDTVFEDIELPGRWTPKIIGGIGGFVKVQYEEVPIEICEHKTTAT  
VGPTPFNIIGRNLM TQLGCTLNF  
>103057\_2 500.0  
PQITLWQRPVVTIKIGGQLREALLDTGADDTVFEDIELPGRWTPKIIGGIGGFVKVQYEEVPIEICEHKTTAT  
LVGPTPFNIIGRNLM TQLGCTLNF  
>123049\_0 500.0  
PQITLWQRPVVTIKIGGQLKDVLM D TGADDTVLEDIDL PGRWKPKLIGGIGGFVKVRQYDHVPVEVCGHKVTT  
VLVGPTPVDVIGRNLLTQIGCTLNF  
>123049\_1 500.0  
PQITLWQRPVVTIKIGGQLKDVLM D TGADDTVLEDIDL PGRWKPKLIGGIGGFVKVRQYDNVPVEVCGHKVTT  
VLVGPTPVDVIGRNLLTQIGCTLNF  
>123049\_2 500.0  
PQITLWQRPVVTIKIGGQLKDVLM D TGADDTVLEDIDL PGRWKPKLIGGIGGFVKVQYDHVPVEVCGHKVTT  
VLVGPTPVDVIGRNLLTQIGCTLNF  
>123049\_3 500.0  
PQITLWQRPVVTIKIGGQLKDVLM D TGADDTVLEDIDL PGRWKPKLIGGIGGFVKVQYDNVPVEVCGHKVTT  
VLVGPTPVDVIGRNLLTQIGCTLNF  
>123049\_4 500.0  
PQITLWQRPVVTIKIGGQLKDVLM D TGADDTVLEDIDL PGRWKPKLIGGIGGFVKVRQYDHVPVEVCGHKVTT  
VLVGPTPVDVIGRNLLTQIGCTLNF  
>123049\_5 500.0  
PQITLWQRPVVTIKIGGQLKDVLM D TGADDTVLEDIDL PGRWKPKLIGGIGGFVKVRQYDNVPVEVCGHKVTT  
VLVGPTPVDVIGRNLLTQIGCTLNF  
>123049\_6 500.0  
PQITLWQRPVVTIKIGGQLKDVLM D TGADDTVLEDIDL PGRWKPKLIGGIGGFVKVQYDHVPVEVCGHKVTT  
VLVGPTPVDVIGRNLLTQIGCTLNF  
>123049\_7 500.0  
PQITLWQRPVVTIKIGGQLKDVLM D TGADDTVLEDIDL PGRWKPKLIGGIGGFVKVQYDNVPVEVCGHKVTT  
VLVGPTPVDVIGRNLLTQIGCTLNF  
>123049\_8 500.0  
PQITLWQRPVVTIKIGGQLKDVLM D TGADDTVLENI DLPGRWKPKLIGGIGGFVKVRQYDHVPVEVCGHKVTT  
VLVGPTPVDVIGRNLLTQIGCTLNF  
>123049\_9 500.0  
PQITLWQRPVVTIKIGGQLKDVLM D TGADDTVLENI DLPGRWKPKLIGGIGGFVKVRQYDNVPVEVCGHKVTT  
VLVGPTPVDVIGRNLLTQIGCTLNF  
>123049\_10 500.0  
PQITLWQRPVVTIKIGGQLKDVLM D TGADDTVLENI DLPGRWKPKLIGGIGGFVKVQYDHVPVEVCGHKVTT  
VLVGPTPVDVIGRNLLTQIGCTLNF  
>123049\_11 500.0

PQITLWQRPIITIKIGGQLKDVLMMDTGADDTVLENIDLPGRWKPKLIGGIGGFVKVKQYDNVPVEVCGHKVTTT  
VLVGPTPVDVIGRNLLTQIGCTLNF  
>123049\_12 500.0  
PQITLWQRPIITIKIGGQLKDVLMMDTGADDTVLENIDLPGKWKPKLIGGIGGFVKVRQYDHPVVEVCGHKVTTT  
VLVGPTPVDVIGRNLLTQIGCTLNF  
>123049\_13 500.0  
PQITLWQRPIITIKIGGQLKDVLMMDTGADDTVLENIDLPGKWKPKLIGGIGGFVKVRQYDNVPVEVCGHKVTTT  
VLVGPTPVDVIGRNLLTQIGCTLNF  
>123049\_14 500.0  
PQITLWQRPIITIKIGGQLKDVLMMDTGADDTVLENIDLPGKWKPKLIGGIGGFVKVKQYDHPVVEVCGHKVTTT  
VLVGPTPVDVIGRNLLTQIGCTLNF  
>123049\_15 500.0  
PQITLWQRPIITIKIGGQLKDVLMMDTGADDTVLENIDLPGKWKPKLIGGIGGFVKVKQYDNVPVEVCGHKVTTT  
VLVGPTPVDVIGRNLLTQIGCTLNF  
>98601\_0 400.0  
PQITLWQRPFVTIKIGGQLIEALLDTGADDTVLEEMNLPGRWKPKIIGGIGGFVKVRQYDQPIEICGHKVITTVL  
IGPTPVNAIGRNLLTQIGCTLNF  
>113192\_1 500.0  
PQITLWQRPFVTMKIGGQLIEALLDTGADDTVLEEISLPGRWKPKIIGGIGGFVKVRQYDQVPIEVFGHKATTT  
VLVGPTPVNVIGRNLMTQLGCTLNF  
>113192\_3 500.0  
PQITLWQRPFVTMKIGGQLIEALLDTGADDTVLEEISLPGRWKPKIIGGIGGFVKVRQYDQVPIEVFGQKATTT  
VLVGPTPVNVIGRNLMTQLGCTLNF  
>113192\_5 500.0  
PQITLWQRPFVTMKIGGQLIEALLDTGADDTVLEEISLPGRWKPKIIGGIGGFVKVRQYDQVPVEVFGHKATTT  
VLVGPTPVNVIGRNLMTQLGCTLNF  
>113192\_7 500.0  
PQITLWQRPFVTMKIGGQLIEALLDTGADDTVLEEISLPGRWKPKIIGGIGGFVKVRQYDQVPVEVFGQKATTT  
VLVGPTPVNVIGRNLMTQLGCTLNF  
>113192\_9 500.0  
PQITLWQRPFVTMKIGGQIIEALLDTGADDTVLEEISLPGRWKPKIIGGIGGFVKVRQYDQVPIEVFGHKATTT  
LVGPTPVNVIGRNLMTQLGCTLNF  
>113192\_11 500.0  
PQITLWQRPFVTMKIGGQIIEALLDTGADDTVLEEISLPGRWKPKIIGGIGGFVKVRQYDQVPIEVFGQKATTT  
LVGPTPVNVIGRNLMTQLGCTLNF  
>113192\_13 500.0  
PQITLWQRPFVTMKIGGQIIEALLDTGADDTVLEEISLPGRWKPKIIGGIGGFVKVRQYDQVPVEVFGHKATTT  
VLVGPTPVNVIGRNLMTQLGCTLNF  
>113192\_15 500.0  
PQITLWQRPFVTMKIGGQIIEALLDTGADDTVLEEISLPGRWKPKIIGGIGGFVKVRQYDQVPVEVFGQKATTT  
VLVGPTPVNVIGRNLMTQLGCTLNF  
>56150\_0 400.0  
PQITLWRRPVVTIKVGGQLTEALLDTGADDTVFEDINLPGRWTPKMIMIGIGLVKVRQYDQVPIEFCGHKVLS  
TVLVGPTPANIIGRNLMTQIGCTLNF  
>56150\_1 400.0  
PQITLWRRPVVTIKVGGQLTEALLDTGADDTVFEDINLPGRWTPKMIMIGIGLVKVRQYDQVPIEFCGRKVLS  
TVLVGPTPANIIGRNLMTQIGCTLNF  
>56150\_2 400.0  
PQITLWRRPVVTIKVGGQLTEALLDTGADDTVFEDINLPGRWTPKMIMIGIGLVKVKQYDQVPIEFCGHKVLS  
TVLVGPTPANIIGRNLMTQIGCTLNF  
>73552\_0 400.0  
PQITLWQRPIVTIKIGGQLREALLDTGADDTILEDLDLPGRWKPKIVGGIGGFVKVRQYDQIPMEIEGHKVVGT  
LVGPTPTNIIGRNVMTQLGCTLNF  
>73552\_3 400.0  
PQITLWQRPIVTIKIGGQLREALLDTGADDTILEDLDLPGRWKPKIVGGIGGFVKVKQYDQIPMEIEGHKVVGT  
LVGPTPTNIVGRNVMTQLGCTLNF  
>81911\_0 500.0  
PQITLWQRPIVTIKIGGQQIEALLDTGADDTVLEDINLPGRWKPKIIGGIGGFVKVRQYDQVPVEICGHKVVGT  
VVVGPTPFNIIGRNLMTQIGCTLNF  
>81911\_1 500.0  
PQITLWQRPIVTIKIGGQQIEALLDTGADDTVLEDINLPGRWKPKIIGGIGGFVKVKQYDQVPVEICGHKVVGT  
VVVGPTPFNIIGRNLMTQIGCTLNF  
>81911\_2 500.0

PQITLWQRPIVTVKVGQQIEALLDTGADDTVLEDINLPGRWPKIIGGIGGFVKVRQYDQVPVEICGHKVVGT  
VVVGTPPFNIIGRNLMQTIGCTLNF  
>81911\_3 500.0  
PQITLWQRPIVTVKVGQQIEALLDTGADDTVLEDINLPGRWPKIIGGIGGFVKVRQYDQVPVEICGHKVVGT  
VVVGTPPFNIIGRNLMQTIGCTLNF  
>115081\_0 500.0  
PQITLWQRPIVTIKIGGQLREALLDTGADDTVLEDIDLPGRWPKLIVGIGGFVKVRQYEQVPIEICGHKVVGT  
LIGTPSNIIGRNLMQTLGCTLNF  
>117033\_0 500.0  
PQITLWQRPIVTIKIGGQIREALLDTGADDTVLEDINLPGRWPKLIVGIGGFCKVKEYDQVPIEICGHKVVGT  
LVGPTPANIIGRNLLTQLGCTLNF  
>117033\_3 500.0  
PQITLWQRPIVTIKIGGQIREALLDTGADDTVLEDINLPGRWEPKLVIGIGGFCKVKEYDQVPIEICGHKVVGT  
LVGPTPANIIGRNLLTQLGCTLNF  
>113192\_0 500.0  
PQITLWQRPFVTMKIGGQLIEALLDTGADDTVLEEISLPGRWPKIIGGIGGFVKVRQYDQVPIEVFGHKAITTV  
LVGPTPVNVIGRNLMQTLGCTLNF  
>113192\_2 500.0  
PQITLWQRPFVTMKIGGQLIEALLDTGADDTVLEEISLPGRWPKIIGGIGGFVKVRQYDQVPIEVFGQKAITTV  
LVGPTPVNVIGRNLMQTLGCTLNF  
>113192\_6 500.0  
PQITLWQRPFVTMKIGGQLIEALLDTGADDTVLEEISLPGRWPKIIGGIGGFVKVRQYDQVPVEVFGQKAITTV  
LVGPTPVNVIGRNLMQTLGCTLNF  
>113192\_8 500.0  
PQITLWQRPFVTMKIGGQIIEALLDTGADDTVLEEISLPGRWPKIIGGIGGFVKVRQYDQVPIEVFGHKAITTV  
LVGPTPVNVIGRNLMQTLGCTLNF  
>113192\_10 500.0  
PQITLWQRPFVTMKIGGQIIEALLDTGADDTVLEEISLPGRWPKIIGGIGGFVKVRQYDQVPIEVFGQKAITTV  
LVGPTPVNVIGRNLMQTLGCTLNF  
>113192\_12 500.0  
PQITLWQRPFVTMKIGGQIIEALLDTGADDTVLEEISLPGRWPKIIGGIGGFVKVRQYDQVPVEVFGHKAITTV  
LVGPTPVNVIGRNLMQTLGCTLNF  
>113192\_14 500.0  
PQITLWQRPFVTMKIGGQIIEALLDTGADDTVLEEISLPGRWPKIIGGIGGFVKVRQYDQVPVEVFGQKAITTV  
LVGPTPVNVIGRNLMQTLGCTLNF  
>98603\_0 400.0  
PQITLWQRPIVTIKIGGQLKEALLDTGADDTVFEEMNLPGRWPKIIGGIGGFVKVRQYDQIPIEICGHKVVGT  
VVGPTPVNAIGRNLLTQIGCTLNF

**Sequences for the IDV-susceptible ensemble**

>102782\_114 0.3  
PQITLWQRPIVTIKVEGQLIEAPLDTGADDTVFEEDMNLPGRWPKMIGGLGGFIKVRQYDQIHIEICGHKAIGTV  
LIGTPVNIIGRNMLTQIGCTLNF  
>102782\_115 0.3  
PQITLWQRPIVTIKVEGQLIEAPLDTGADDTVFEEDMNLPGRWPKMIGGLGGFIKVRQYDQIHIEICGHKAIGTV  
LIGTPVNIIGRSMLTQIGCTLNF  
>102782\_120 0.3  
PQITLWQRPIVTIKVEGQLIEAPLDTGADDTVFEEDVNLPGRWPKMIGGLGGFIKVRQYDQIHIEICGHKAIGTV  
LVGPTPVNIIGRNMLTQIGCTLNF  
>102782\_121 0.3  
PQITLWQRPIVTIKVEGQLIEAPLDTGADDTVFEEDVNLPGRWPKMIGGLGGFIKVRQYDQIHIEICGHKAIGTV  
LVGPTPVNIIGRSMLTQIGCTLNF  
>102782\_122 0.3  
PQITLWQRPIVTIKVEGQLIEAPLDTGADDTVFEEDVNLPGRWPKMIGGLGGFIKVRQYDQIHIEICGHKAIGTV  
LIGTPVNIIGRNMLTQIGCTLNF  
>102782\_123 0.3  
PQITLWQRPIVTIKVEGQLIEAPLDTGADDTVFEEDVNLPGRWPKMIGGLGGFIKVRQYDQIHIEICGHKAIGTV  
LIGTPVNIIGRSMLTQIGCTLNF  
>102782\_100 0.3  
PQITLWQRPIVTIKVEGQLIEAPLDTGADDTVLEDMNLPGRWPKMIGGLGGFIKVRQYDQIHIEICGHKVVGT  
LVGPTPVNIIGRNMLTQIGCTLNF  
>102782\_101 0.3  
PQITLWQRPIVTIKVEGQLIEAPLDTGADDTVLEDMNLPGRWPKMIGGLGGFIKVRQYDQIHIEICGHKVVGT

LVGPTPVNIIGRSMLTQIGCTLNF  
>102782\_102 0.3  
PQITLWQRPIVTIKVEGQLIEAPLDTGADDTVLEDNMNLPGRWPKMIGGLGGFIKVRQYDQIHIEICGHKVIQTV  
LIGPTPVNIIGRNMLTQIGCTLNF  
>102782\_103 0.3  
PQITLWQRPIVTIKVEGQLIEAPLDTGADDTVLEDNMNLPGRWPKMIGGLGGFIKVRQYDQIHIEICGHKVIQTV  
LIGPTPVNIIGRSMLTQIGCTLNF  
>102782\_108 0.3  
PQITLWQRPIVTIKVEGQLIEAPLDTGADDTVLEDVNLNLPGRWPKMIGGLGGFIKVRQYDQIHIEICGHKVIQTV  
LVGPTPVNIIGRNMLTQIGCTLNF  
>102782\_109 0.3  
PQITLWQRPIVTIKVEGQLIEAPLDTGADDTVLEDVNLNLPGRWPKMIGGLGGFIKVRQYDQIHIEICGHKVIQTV  
LVGPTPVNIIGRSMLTQIGCTLNF  
>102782\_110 0.3  
PQITLWQRPIVTIKVEGQLIEAPLDTGADDTVLEDVNLNLPGRWPKMIGGLGGFIKVRQYDQIHIEICGHKVIQTV  
LIGPTPVNIIGRNMLTQIGCTLNF  
>102782\_111 0.3  
PQITLWQRPIVTIKVEGQLIEAPLDTGADDTVLEDVNLNLPGRWPKMIGGLGGFIKVRQYDQIHIEICGHKVIQTV  
LIGPTPVNIIGRSMLTQIGCTLNF  
>102782\_116 0.3  
PQITLWQRPIVTIKVEGQLIEAPLDTGADDTVFEDNMNLPGRWPKMIGGLGGFIKVRQYDQIHIEICGHKVIQTV  
LVGPTPVNIIGRNMLTQIGCTLNF  
>102782\_117 0.3  
PQITLWQRPIVTIKVEGQLIEAPLDTGADDTVFEDNMNLPGRWPKMIGGLGGFIKVRQYDQIHIEICGHKVIQTV  
LVGPTPVNIIGRSMLTQIGCTLNF  
>102782\_118 0.3  
PQITLWQRPIVTIKVEGQLIEAPLDTGADDTVFEDNMNLPGRWPKMIGGLGGFIKVRQYDQIHIEICGHKVIQTV  
LIGPTPVNIIGRNMLTQIGCTLNF  
>102782\_119 0.3  
PQITLWQRPIVTIKVEGQLIEAPLDTGADDTVFEDNMNLPGRWPKMIGGLGGFIKVRQYDQIHIEICGHKVIQTV  
LIGPTPVNIIGRSMLTQIGCTLNF  
>102782\_124 0.3  
PQITLWQRPIVTIKVEGQLIEAPLDTGADDTVFEDVNLNLPGRWPKMIGGLGGFIKVRQYDQIHIEICGHKVIQTV  
LVGPTPVNIIGRNMLTQIGCTLNF  
>102782\_125 0.3  
PQITLWQRPIVTIKVEGQLIEAPLDTGADDTVFEDVNLNLPGRWPKMIGGLGGFIKVRQYDQIHIEICGHKVIQTV  
LVGPTPVNIIGRSMLTQIGCTLNF  
>102782\_126 0.3  
PQITLWQRPIVTIKVEGQLIEAPLDTGADDTVFEDVNLNLPGRWPKMIGGLGGFIKVRQYDQIHIEICGHKVIQTV  
LIGPTPVNIIGRNMLTQIGCTLNF  
>102782\_127 0.3  
PQITLWQRPIVTIKVEGQLIEAPLDTGADDTVFEDVNLNLPGRWPKMIGGLGGFIKVRQYDQIHIEICGHKVIQTV  
LIGPTPVNIIGRSMLTQIGCTLNF  
>102782\_42 0.3  
PQITLWQRPIVTIKVEGQLKEAPLDTGADDTVLEDVNLNLPGRWPKMIGGLGGFIKVRQYDQIHIEICGHKAIGT  
VLIGPTPVNIIGRNMLTQIGCTLNF  
>102782\_43 0.3  
PQITLWQRPIVTIKVEGQLKEAPLDTGADDTVLEDVNLNLPGRWPKMIGGLGGFIKVRQYDQIHIEICGHKAIGT  
VLIGPTPVNIIGRSMLTQIGCTLNF  
>102782\_48 0.3  
PQITLWQRPIVTIKVEGQLKEAPLDTGADDTVFEDNMNLPGRWPKMIGGLGGFIKVRQYDQIHIEICGHKAIGT  
VLGPTPVNIIGRNMLTQIGCTLNF  
>102782\_49 0.3  
PQITLWQRPIVTIKVEGQLKEAPLDTGADDTVFEDNMNLPGRWPKMIGGLGGFIKVRQYDQIHIEICGHKAIGT  
VLGPTPVNIIGRSMLTQIGCTLNF  
>102782\_50 0.3  
PQITLWQRPIVTIKVEGQLKEAPLDTGADDTVFEDNMNLPGRWPKMIGGLGGFIKVRQYDQIHIEICGHKAIGT  
VLIGPTPVNIIGRNMLTQIGCTLNF  
>102782\_51 0.3  
PQITLWQRPIVTIKVEGQLKEAPLDTGADDTVFEDNMNLPGRWPKMIGGLGGFIKVRQYDQIHIEICGHKAIGT  
VLIGPTPVNIIGRSMLTQIGCTLNF  
>102782\_56 0.3  
PQITLWQRPIVTIKVEGQLKEAPLDTGADDTVFEDVNLNLPGRWPKMIGGLGGFIKVRQYDQIHIEICGHKAIGT

VLVGPTPVNIIGRNMLTQIGCTLNF  
>102782\_57 0.3  
PQITLWQRPIVTIKVEGQLKEAPLDTGADDTVFEDVNLPGRWPKPKMIGGLGGFIKVRQYDQIHIEICGHKAIGT  
VLVGPTPVNIIGRSMLTQIGCTLNF  
>102782\_58 0.3  
PQITLWQRPIVTIKVEGQLKEAPLDTGADDTVFEDVNLPGRWPKPKMIGGLGGFIKVRQYDQIHIEICGHKAIGT  
VLIGPTPVNIIGRNMLTQIGCTLNF  
>102782\_59 0.3  
PQITLWQRPIVTIKVEGQLKEAPLDTGADDTVFEDVNLPGRWPKPKMIGGLGGFIKVRQYDQIHIEICGHKAIGT  
VLIGPTPVNIIGRSMLTQIGCTLNF  
>102782\_160 0.3  
PQITLWQRPIVTIKVEGQLTEAPLDTGADDTVLEDNMLPGRWPKPKMIGGLGGFIKVRQYDQIHIEICGHKAIGT  
VLVGPTPVNIIGRNMLTQIGCTLNF  
>102782\_161 0.3  
PQITLWQRPIVTIKVEGQLTEAPLDTGADDTVLEDNMLPGRWPKPKMIGGLGGFIKVRQYDQIHIEICGHKAIGT  
VLVGPTPVNIIGRSMLTQIGCTLNF  
>102782\_162 0.3  
PQITLWQRPIVTIKVEGQLTEAPLDTGADDTVLEDNMLPGRWPKPKMIGGLGGFIKVRQYDQIHIEICGHKAIGT  
VLIGPTPVNIIGRNMLTQIGCTLNF  
>102782\_169 0.3  
PQITLWQRPIVTIKVEGQLTEAPLDTGADDTVLEDVNLPGRWPKPKMIGGLGGFIKVRQYDQIHIEICGHKAIGT  
VLVGPTPVNIIGRSMLTQIGCTLNF  
>102782\_171 0.3  
PQITLWQRPIVTIKVEGQLTEAPLDTGADDTVLEDVNLPGRWPKPKMIGGLGGFIKVRQYDQIHIEICGHKAIGT  
VLIGPTPVNIIGRSMLTQIGCTLNF  
>102782\_176 0.3  
PQITLWQRPIVTIKVEGQLTEAPLDTGADDTVFEDNMLPGRWPKPKMIGGLGGFIKVRQYDQIHIEICGHKAIGT  
VLVGPTPVNIIGRNMLTQIGCTLNF  
>102782\_47 0.3  
PQITLWQRPIVTIKVEGQLKEAPLDTGADDTVLEDVNLPGRWPKPKMIGGLGGFIKVRQYDQIHIEICGHKVIGT  
VLIGPTPVNIIGRSMLTQIGCTLNF  
>102782\_52 0.3  
PQITLWQRPIVTIKVEGQLKEAPLDTGADDTVFEDNMLPGRWPKPKMIGGLGGFIKVRQYDQIHIEICGHKVIGT  
VLVGPTPVNIIGRNMLTQIGCTLNF  
>102782\_53 0.3  
PQITLWQRPIVTIKVEGQLKEAPLDTGADDTVFEDNMLPGRWPKPKMIGGLGGFIKVRQYDQIHIEICGHKVIGT  
VLVGPTPVNIIGRSMLTQIGCTLNF  
>102782\_54 0.3  
PQITLWQRPIVTIKVEGQLKEAPLDTGADDTVFEDNMLPGRWPKPKMIGGLGGFIKVRQYDQIHIEICGHKVIGT  
VLIGPTPVNIIGRNMLTQIGCTLNF  
>102782\_55 0.3  
PQITLWQRPIVTIKVEGQLKEAPLDTGADDTVFEDNMLPGRWPKPKMIGGLGGFIKVRQYDQIHIEICGHKVIGT  
VLIGPTPVNIIGRSMLTQIGCTLNF  
>102782\_60 0.3  
PQITLWQRPIVTIKVEGQLKEAPLDTGADDTVFEDVNLPGRWPKPKMIGGLGGFIKVRQYDQIHIEICGHKVIGT  
VLVGPTPVNIIGRNMLTQIGCTLNF  
>102782\_61 0.3  
PQITLWQRPIVTIKVEGQLKEAPLDTGADDTVFEDVNLPGRWPKPKMIGGLGGFIKVRQYDQIHIEICGHKVIGT  
VLVGPTPVNIIGRSMLTQIGCTLNF  
>102782\_62 0.3  
PQITLWQRPIVTIKVEGQLKEAPLDTGADDTVFEDVNLPGRWPKPKMIGGLGGFIKVRQYDQIHIEICGHKVIGT  
VLIGPTPVNIIGRNMLTQIGCTLNF  
>102782\_63 0.3  
PQITLWQRPIVTIKVEGQLKEAPLDTGADDTVFEDVNLPGRWPKPKMIGGLGGFIKVRQYDQIHIEICGHKVIGT  
VLIGPTPVNIIGRSMLTQIGCTLNF  
>102782\_164 0.3  
PQITLWQRPIVTIKVEGQLTEAPLDTGADDTVLEDNMLPGRWPKPKMIGGLGGFIKVRQYDQIHIEICGHKVIGT  
VLVGPTPVNIIGRNMLTQIGCTLNF  
>102782\_165 0.3  
PQITLWQRPIVTIKVEGQLTEAPLDTGADDTVLEDNMLPGRWPKPKMIGGLGGFIKVRQYDQIHIEICGHKVIGT  
VLVGPTPVNIIGRSMLTQIGCTLNF  
>102782\_166 0.3  
PQITLWQRPIVTIKVEGQLTEAPLDTGADDTVLEDNMLPGRWPKPKMIGGLGGFIKVRQYDQIHIEICGHKVIGT



VLIGPTPVNIIGRNMLTQIGCTLNF  
>102782\_167 0.3  
PQITLWQRPIVTIKVEGQLTEAPLDTGADDTVLEDNLPGRWKPKMIGGLGGFIKVRQYDQIHIEICGHKVI  
VLIGPTPVNIIGRSMLTQIGCTLNF  
>102782\_172 0.3  
PQITLWQRPIVTIKVEGQLTEAPLDTGADDTVLEDVNLPGRWKPKMIGGLGGFIKVRQYDQIHIEICGHKVI  
VLVGPTPVNIIGRNMLTQIGCTLNF  
>102782\_173 0.3  
PQITLWQRPIVTIKVEGQLTEAPLDTGADDTVLEDVNLPGRWKPKMIGGLGGFIKVRQYDQIHIEICGHKVI  
VLVGPTPVNIIGRSMLTQIGCTLNF  
>102782\_174 0.3  
PQITLWQRPIVTIKVEGQLTEAPLDTGADDTVLEDVNLPGRWKPKMIGGLGGFIKVRQYDQIHIEICGHKVI  
VLIGPTPVNIIGRNMLTQIGCTLNF  
>102782\_175 0.3  
PQITLWQRPIVTIKVEGQLTEAPLDTGADDTVLEDVNLPGRWKPKMIGGLGGFIKVRQYDQIHIEICGHKVI  
VLIGPTPVNIIGRSMLTQIGCTLNF  
>102782\_180 0.3  
PQITLWQRPIVTIKVEGQLTEAPLDTGADTVFEDMNLPGRWKPKMIGGLGGFIKVRQYDQIHIEICGHKVI  
VLVGPTPVNIIGRNMLTQIGCTLNF  
>102782\_181 0.3  
PQITLWQRPIVTIKVEGQLTEAPLDTGADTVFEDMNLPGRWKPKMIGGLGGFIKVRQYDQIHIEICGHKVI  
VLVGPTPVNIIGRSMLTQIGCTLNF  
>102782\_182 0.3  
PQITLWQRPIVTIKVEGQLTEAPLDTGADTVFEDMNLPGRWKPKMIGGLGGFIKVRQYDQIHIEICGHKVI  
VLIGPTPVNIIGRNMLTQIGCTLNF  
>102782\_183 0.3  
PQITLWQRPIVTIKVEGQLTEAPLDTGADTVFEDMNLPGRWKPKMIGGLGGFIKVRQYDQIHIEICGHKVI  
VLIGPTPVNIIGRSMLTQIGCTLNF  
>102782\_188 0.3  
PQITLWQRPIVTIKVEGQLTEAPLDTGADTVFEDVNLPGRWKPKMIGGLGGFIKVRQYDQIHIEICGHKVI  
VLVGPTPVNIIGRNMLTQIGCTLNF  
>102782\_189 0.3  
PQITLWQRPIVTIKVEGQLTEAPLDTGADTVFEDVNLPGRWKPKMIGGLGGFIKVRQYDQIHIEICGHKVI  
VLVGPTPVNIIGRSMLTQIGCTLNF  
>102782\_190 0.3  
PQITLWQRPIVTIKVEGQLTEAPLDTGADTVFEDVNLPGRWKPKMIGGLGGFIKVRQYDQIHIEICGHKVI  
VLIGPTPVNIIGRNMLTQIGCTLNF  
>102782\_191 0.3  
PQITLWQRPIVTIKVEGQLTEAPLDTGADTVFEDVNLPGRWKPKMIGGLGGFIKVRQYDQIHIEICGHKVI  
VLIGPTPVNIIGRSMLTQIGCTLNF  
>102782\_76 0.3  
PQITLWQRPIVTIKVEGQLIEALLDTGADDTVLEDVNLPGRWKPKMIGGLGGFIKVRQYDQIHIEICGHKVI  
LVGPTPVNIIGRNMLTQIGCTLNF  
>102782\_78 0.3  
PQITLWQRPIVTIKVEGQLIEALLDTGADDTVLEDVNLPGRWKPKMIGGLGGFIKVRQYDQIHIEICGHKVI  
LIGPTPVNIIGRNMLTQIGCTLNF  
>102782\_79 0.3  
PQITLWQRPIVTIKVEGQLIEALLDTGADDTVLEDVNLPGRWKPKMIGGLGGFIKVRQYDQIHIEICGHKVI  
LIGPTPVNIIGRSMLTQIGCTLNF  
>102782\_84 0.3  
PQITLWQRPIVTIKVEGQLIEALLDTGADTVFEDMNLPGRWKPKMIGGLGGFIKVRQYDQIHIEICGHKVI  
LVGPTPVNIIGRNMLTQIGCTLNF  
>102782\_85 0.3  
PQITLWQRPIVTIKVEGQLIEALLDTGADTVFEDMNLPGRWKPKMIGGLGGFIKVRQYDQIHIEICGHKVI  
LVGPTPVNIIGRSMLTQIGCTLNF  
>102782\_86 0.3  
PQITLWQRPIVTIKVEGQLIEALLDTGADTVFEDMNLPGRWKPKMIGGLGGFIKVRQYDQIHIEICGHKVI  
LIGPTPVNIIGRNMLTQIGCTLNF  
>102782\_87 0.3  
PQITLWQRPIVTIKVEGQLIEALLDTGADTVFEDMNLPGRWKPKMIGGLGGFIKVRQYDQIHIEICGHKVI  
LIGPTPVNIIGRSMLTQIGCTLNF  
>102782\_92 0.3  
PQITLWQRPIVTIKVEGQLIEALLDTGADTVFEDVNLPGRWKPKMIGGLGGFIKVRQYDQIHIEICGHKVI

LVGPTPVNIIGRNMLTQIGCTLNF  
>102782\_93 0.3  
PQITLWQRPIVTIKVEGQLIEALLDTGADDTVFEDVNLPGRWKPKMIGGLGGFIKVRQYDQIHIEICGHKVIQTV  
LVGPTPVNIIGRSMLTQIGCTLNF  
>102782\_94 0.3  
PQITLWQRPIVTIKVEGQLIEALLDTGADDTVFEDVNLPGRWKPKMIGGLGGFIKVRQYDQIHIEICGHKVIQTV  
LIGPTPVNIIGRNMLTQIGCTLNF  
>102782\_95 0.3  
PQITLWQRPIVTIKVEGQLIEALLDTGADDTVFEDVNLPGRWKPKMIGGLGGFIKVRQYDQIHIEICGHKVIQTV  
LIGPTPVNIIGRSMLTQIGCTLNF  
>102793\_0 0.2  
PQITLWQRPLVTIKIGGQLKEALLDTGADDTVFEDIDLPGRWKPKMIGGLGGFIKVRQYDQITIEICGHKAIGTVL  
VGPTPVNIIGRNMLTQIGCTLNF  
>102782\_19 0.3  
PQITLWQRPIVTIKVEGQLKEALLDTGADDTVFEDMNLPGRWKPKMIGGLGGFIKVRQYDQIHIEICGHKAIGT  
VLIGPTPVNIIGRSMLTQIGCTLNF  
>102782\_24 0.3  
PQITLWQRPIVTIKVEGQLKEALLDTGADDTVFEDVNLPGRWKPKMIGGLGGFIKVRQYDQIHIEICGHKAIGT  
VLVGPPTVNIIGRNMLTQIGCTLNF  
>102782\_25 0.3  
PQITLWQRPIVTIKVEGQLKEALLDTGADDTVFEDVNLPGRWKPKMIGGLGGFIKVRQYDQIHIEICGHKAIGT  
VLVGPPTVNIIGRSMLTQIGCTLNF  
>102782\_26 0.3  
PQITLWQRPIVTIKVEGQLKEALLDTGADDTVFEDVNLPGRWKPKMIGGLGGFIKVRQYDQIHIEICGHKAIGT  
VLIGPTPVNIIGRNMLTQIGCTLNF  
>102782\_27 0.3  
PQITLWQRPIVTIKVEGQLKEALLDTGADDTVFEDVNLPGRWKPKMIGGLGGFIKVRQYDQIHIEICGHKAIGT  
VLIGPTPVNIIGRSMLTQIGCTLNF  
>102782\_128 0.3  
PQITLWQRPIVTIKVEGQLTEALLDTGADDTVLEDMNLPGRWKPKMIGGLGGFIKVRQYDQIHIEICGHKAIGT  
VLVGPPTVNIIGRNMLTQIGCTLNF  
>102782\_129 0.3  
PQITLWQRPIVTIKVEGQLTEALLDTGADDTVLEDMNLPGRWKPKMIGGLGGFIKVRQYDQIHIEICGHKAIGT  
VLVGPPTVNIIGRSMLTQIGCTLNF  
>102782\_130 0.3  
PQITLWQRPIVTIKVEGQLTEALLDTGADDTVLEDMNLPGRWKPKMIGGLGGFIKVRQYDQIHIEICGHKAIGT  
VLIGPTPVNIIGRNMLTQIGCTLNF  
>102782\_131 0.3  
PQITLWQRPIVTIKVEGQLTEALLDTGADDTVLEDMNLPGRWKPKMIGGLGGFIKVRQYDQIHIEICGHKAIGT  
VLIGPTPVNIIGRSMLTQIGCTLNF  
>102782\_136 0.3  
PQITLWQRPIVTIKVEGQLTEALLDTGADDTVLEDVNLPGRWKPKMIGGLGGFIKVRQYDQIHIEICGHKAIGTV  
LVGPTPVNIIGRNMLTQIGCTLNF  
>102782\_137 0.3  
PQITLWQRPIVTIKVEGQLTEALLDTGADDTVLEDVNLPGRWKPKMIGGLGGFIKVRQYDQIHIEICGHKAIGTV  
LVGPTPVNIIGRSMLTQIGCTLNF  
>102782\_138 0.3  
PQITLWQRPIVTIKVEGQLTEALLDTGADDTVLEDVNLPGRWKPKMIGGLGGFIKVRQYDQIHIEICGHKAIGTV  
LIGPTPVNIIGRNMLTQIGCTLNF  
>102782\_139 0.3  
PQITLWQRPIVTIKVEGQLTEALLDTGADDTVLEDVNLPGRWKPKMIGGLGGFIKVRQYDQIHIEICGHKAIGTV  
LIGPTPVNIIGRSMLTQIGCTLNF  
>102782\_144 0.3  
PQITLWQRPIVTIKVEGQLTEALLDTGADDTVFEDMNLPGRWKPKMIGGLGGFIKVRQYDQIHIEICGHKAIGT  
VLVGPPTVNIIGRNMLTQIGCTLNF  
>102782\_145 0.3  
PQITLWQRPIVTIKVEGQLTEALLDTGADDTVFEDMNLPGRWKPKMIGGLGGFIKVRQYDQIHIEICGHKAIGT  
VLVGPPTVNIIGRSMLTQIGCTLNF  
>102782\_146 0.3  
PQITLWQRPIVTIKVEGQLTEALLDTGADDTVFEDMNLPGRWKPKMIGGLGGFIKVRQYDQIHIEICGHKAIGT  
VLIGPTPVNIIGRNMLTQIGCTLNF  
>102782\_147 0.3  
PQITLWQRPIVTIKVEGQLTEALLDTGADDTVFEDMNLPGRWKPKMIGGLGGFIKVRQYDQIHIEICGHKAIGT

VLIGPTPVNIIGRSMLTQIGCTLNF  
>102782\_152 0.3  
PQITLWQRPIVTIKVEGQLTEALLDTGADDTVFEDVNL PGRWPKMIGGLGGFIKVRQYDQIHIEICGHKAIGTV  
LVGPTPVNIIGRNMLTQIGCTLNF  
>102782\_153 0.3  
PQITLWQRPIVTIKVEGQLTEALLDTGADDTVFEDVNL PGRWPKMIGGLGGFIKVRQYDQIHIEICGHKAIGTV  
LVGPTPVNIIGRSMLTQIGCTLNF  
>102782\_154 0.3  
PQITLWQRPIVTIKVEGQLTEALLDTGADDTVFEDVNL PGRWPKMIGGLGGFIKVRQYDQIHIEICGHKAIGTV  
LIGPTPVNIIGRNMLTQIGCTLNF  
>102782\_155 0.3  
PQITLWQRPIVTIKVEGQLTEALLDTGADDTVFEDVNL PGRWPKMIGGLGGFIKVRQYDQIHIEICGHKAIGTV  
LIGPTPVNIIGRSMLTQIGCTLNF  
>102782\_7 0.3  
PQITLWQRPIVTIKVEGQLKEALLDTGADDTVLEDMLNLPGRWPKMIGGLGGFIKVRQYDQIHIEICGHKVIGT  
VLIGPTPVNIIGRSMLTQIGCTLNF  
>102782\_158 0.3  
PQITLWQRPIVTIKVEGQLTEALLDTGADDTVFEDVNL PGRWPKMIGGLGGFIKVRQYDQIHIEICGHKVIGTV  
LIGPTPVNIIGRNMLTQIGCTLNF  
>102782\_159 0.3  
PQITLWQRPIVTIKVEGQLTEALLDTGADDTVFEDVNL PGRWPKMIGGLGGFIKVRQYDQIHIEICGHKVIGTV  
LIGPTPVNIIGRSMLTQIGCTLNF  
>257929\_0 0.3  
PQITLWQRPLVTVKVGQQLKEALLDTGADDTVLEEMNLQGRWPKMIGGIGGFIKVKQYDQIPVEICGHKAIG  
TVLVGPTPVNIIGRNLLTQIGCTLNF

**Sequences for the LPV-resistant ensemble**

>187119\_0 500.0  
PQITLWQRPIIPVRIGGQLKEALLDTGADDTIFEEMTLPGRWQPKIVGGIGGFLKVRQYDQIPIEF CGYKVMCT  
VLIGSTPINVIGRDLTKIGCTLNF  
>154816\_0 500.0  
PQITLWQRPFITVKIGGQQMEALLDTGADDTIVEAINLPGRWPKPKIVGGIGGFMKVQYDQVPVEICGHKAITA  
VLVGPPTPVNVIGRNVM TQIGCTLNF  
>117033\_2 500.0  
PQITLWQRPIVTIKIGGQIREALLDTGADDTVLEDINLPGRWPKPLIVGIGGFTKVKEYDQVPIEICGHKVVGTVL  
VGPTPANIIGRNLLTQLGCTLNF  
>117033\_4 500.0  
PQITLWQRPIVTIKIGGQIREALLDTGADDTVLEDINLPGRWEPKLVIGIGGFSKVKEYDQVPIEICGHKVVGTVL  
VGPTPANIIGRNLLTQLGCTLNF  
>117033\_5 500.0  
PQITLWQRPIVTIKIGGQIREALLDTGADDTVLEDINLPGRWEPKLVIGIGGFTKVKEYDQVPIEICGHKVVGTVL  
VGPTPANIIGRNLLTQLGCTLNF  
>147553\_0 500.0  
PQITLWQRPIVTIKIGGQLREALLDTGADDTVFTDIDL PGRWTPKIIVGVGGFSKVQYDQVPIEICGHKVVGTV  
LIGPTPANIVGRNLLTQLGCTLNF  
>81925\_0 500.0  
PQITLWQRPFVTVKIAGQIKEALLDTGADDTVFQEMDLPGRWPKKLIGGIGGFVKVRQYDQVLI EFCGHKTTTC  
TVLVGPTPVNVIGRNLM SQLGCTLNF  
>81925\_2 500.0  
PQITLWQRPFVTVKIAGQVKEALLDTGADDTVFQEMDLPGRWPKKLIGGIGGFVKVRQYDQVLI EFCGHKTT  
CTVLVGPPTPVNVIGRNLM SQLGCTLNF  
>50921\_0 500.0  
PQITLWQRPIVTIKIAGQQKEALLDTGADDTILEEMSLPGKWKPRIAGGIGGFIKVRQYDQIPIEICGHKVVGTVL  
VGPTPANIIGRNLM TKGCTLNF  
>117063\_1 500.0  
PQITLWQRPVVTVKVAGQLREALLDTGADDTIFEEINLPGRWTPKIVGGIGGFMKVQYDQIPIEICGHKVISTV  
LVGPTPTNIIGGNLMTQIGCTLNF  
>103779\_0 500.0  
PQITLWQRPIIKVKIGGQLVEALLDTGADDTILEGINLPGRWPKPKIVGGIGGFMKVKEYDQIPVEICGHKIISTVLV  
GPTPVNIIGRNVM TQIGCTLNF  
>103779\_1 500.0  
PQITLWQRPIIKVKIGGQLVEALLDTGADDTILEGINLPGRWPKPKIVGGIGGFMKVKEYDQIPVEICGHKIISTVLV  
GPTPVNVIGRNVM TQIGCTLNF

>103779\_2 500.0  
PQITLWQRPIIKVKIGGQLVEALLDTGADDTILEGINLPGRWPKPKIVGGIGGFMKVKEYDQIPVEICGHKVISTVL  
VGPTPVNIIGRNVMTQIGCTLNF

>103779\_3 500.0  
PQITLWQRPIIKVKIGGQLVEALLDTGADDTILEGINLPGRWPKPKIVGGIGGFMKVKEYDQIPVEICGHKVISTVL  
VGPTPVNIIGRNVMTQIGCTLNF

>103779\_4 500.0  
PQITLWQRPIIKVKIGGQLVEALLDTGADDTILEGIDLPGRWPKPKIVGGIGGFMKVKEYDQIPVEICGHKIISTVL  
GPTPVNIIGRNVMTQIGCTLNF

>103779\_5 500.0  
PQITLWQRPIIKVKIGGQLVEALLDTGADDTILEGIDLPGRWPKPKIVGGIGGFMKVKEYDQIPVEICGHKIISTVL  
GPTPVNIIGRNVMTQIGCTLNF

>103779\_6 500.0  
PQITLWQRPIIKVKIGGQLVEALLDTGADDTILEGIDLPGRWPKPKIVGGIGGFMKVKEYDQIPVEICGHKVISTVL  
VGPTPVNIIGRNVMTQIGCTLNF

>103779\_7 500.0  
PQITLWQRPIIKVKIGGQLVEALLDTGADDTILEGIDLPGRWPKPKIVGGIGGFMKVKEYDQIPVEICGHKVISTVL  
VGPTPVNIIGRNVMTQIGCTLNF

>103779\_8 500.0  
PQITLWQRPIIKVKIGGQLVEALLDTGADDTIFEGINLPGRWPKPKIVGGIGGFMKVKEYDQIPVEICGHKIISTVL  
VGPTPVNIIGRNVMTQIGCTLNF

>103779\_9 500.0  
PQITLWQRPIIKVKIGGQLVEALLDTGADDTIFEGINLPGRWPKPKIVGGIGGFMKVKEYDQIPVEICGHKIISTVL  
VGPTPVNIIGRNVMTQIGCTLNF

>103779\_10 500.0  
PQITLWQRPIIKVKIGGQLVEALLDTGADDTIFEGINLPGRWPKPKIVGGIGGFMKVKEYDQIPVEICGHKVISTVL  
VGPTPVNIIGRNVMTQIGCTLNF

>103779\_11 500.0  
PQITLWQRPIIKVKIGGQLVEALLDTGADDTIFEGINLPGRWPKPKIVGGIGGFMKVKEYDQIPVEICGHKVISTVL  
VGPTPVNIIGRNVMTQIGCTLNF

>103779\_12 500.0  
PQITLWQRPIIKVKIGGQLVEALLDTGADDTIFEGIDLPGRWPKPKIVGGIGGFMKVKEYDQIPVEICGHKIISTVL  
VGPTPVNIIGRNVMTQIGCTLNF

>103779\_13 500.0  
PQITLWQRPIIKVKIGGQLVEALLDTGADDTIFEGIDLPGRWPKPKIVGGIGGFMKVKEYDQIPVEICGHKIISTVL  
VGPTPVNIIGRNVMTQIGCTLNF

>103779\_14 500.0  
PQITLWQRPIIKVKIGGQLVEALLDTGADDTIFEGIDLPGRWPKPKIVGGIGGFMKVKEYDQIPVEICGHKVISTVL  
VGPTPVNIIGRNVMTQIGCTLNF

>103779\_15 500.0  
PQITLWQRPIIKVKIGGQLVEALLDTGADDTIFEGIDLPGRWPKPKIVGGIGGFMKVKEYDQIPVEICGHKVISTVL  
VGPTPVNIIGRNVMTQIGCTLNF

>147550\_0 500.0  
PQITLWQRPIIKVKIGGQLVEALLDTGADDTIFEGIDLPGRWPKPKIVGGIGGFMKVKEYDQIPVEICGHKVISTV  
LVGPTPVNIIGRNVMTQIGCTLNF

>103057\_2 500.0  
PQITLWQRPIVTVKIGGQLREALLDTGADDTVFEDIELPGRWTPKIIGGIGGFVKVKQYEEVPVEICEHKTATV  
LVGPTPFNIIGRNLMTQLGCTLNF

>117027\_0 500.0  
PQITLWQRPFVTVKIGGQPKEALLDTGADNTVFEDINLPGRWTPKIIGGIGGFVVRVKQYDQVPIECGHKTIGTI  
LVGPTPANIIGRDVLTQIGCTLNF

>117027\_1 500.0  
PQITLWQRPFVTVKIGGQPKEALLDTGADNTVFEDINLPGRWTPKIIGGIGGFVVRVKQYDQVPIECGHKTMGT  
ILVGPTPANIIGRDVLTQIGCTLNF

>143473\_1 500.0  
PQITLWQRPIVTVKIGGQLREALLDTGADDTVFEDIDLGRWTPKLIIGGIGGFVKVRQYDQVPIECGHKITSTV  
LVGPTPANIIGRNLMTQLGCTLNF

>143473\_3 500.0  
PQITLWQRPIVTVKIGGQLREALLDTGADDTVFEDIDLGRWTPKLIIGGIGGFVKVRQYDQVPIECGHKVTST  
VLVGPTPANIIGRNLMTQLGCTLNF

>143473\_5 500.0  
PQITLWQRPIVTVKIGGQLREALLDTGADDTVFEDIDLGRWTPKLIIGGIGGFVVRQYDQVPIECGHKITSTV  
LVGPTPANIIGRNLMTQLGCTLNF

>143473\_7 500.0  
PQITLWQRPIVTVKIGGQLREALLDTGADDTVFEDIDLPGRWTPKLIIGGIGGFVVRVRYDQVPIEICGHKVTST  
VLVGPTPANIIGRNLMTQLGCTLNF

>143473\_9 500.0  
PQITLWQRPIVTVKIGGQIREALLDTGADDTVFEDIDLPGRWTPKLIIGGIGGFVKVRVRYDQVPIEICGHKITSTV  
LVGPTPANIIGRNLMTQLGCTLNF

>143473\_11 500.0  
PQITLWQRPIVTVKIGGQIREALLDTGADDTVFEDIDLPGRWTPKLIIGGIGGFVKVRVRYDQVPIEICGHKVTSTV  
LVGPTPANIIGRNLMTQLGCTLNF

>143473\_13 500.0  
PQITLWQRPIVTVKIGGQIREALLDTGADDTVFEDIDLPGRWTPKLIIGGIGGFVVRVRYDQVPIEICGHKITSTV  
LVGPTPANIIGRNLMTQLGCTLNF

>143473\_15 500.0  
PQITLWQRPIVTVKIGGQIREALLDTGADDTVFEDIDLPGRWTPKLIIGGIGGFVVRVRYDQVPIEICGHKVTSTV  
LVGPTPANIIGRNLMTQLGCTLNF

>115081\_0 500.0  
PQITLWQRPIVTVKIGGQLREALLDTGADDTVLEDIDLPGRWKPKLIVGIGGFVKVRQYEQVPIEICGHKVVGTV  
LIGPTPSNIIGRNLMTQLGCTLNF

>86742\_0 500.0  
PQITLWQRPFITIKIGGQLREALLDTGADDTIFEDIQLPGRWPKIVGGIGGFVKVKEYEQVPIEICGHKVISTVL  
TGPTPVNVIGRNVMTQLGCTLNF

>86742\_1 500.0  
PQITLWQRPFITIKIGGQLREALLDTGADDTIFEDIQLPGRWPKIVGGIGGFVKVKEYEQVPIEICGHKVISTVL  
TGPTPVNVIGRNVMTQLGCTLNF

>82251\_0 500.0  
PQITLWQRPIVTVKIGGQLKEALLDTGADDTIFEEINLPGRWPKMAGGIGGFIKVRQYDQIPIEICGHEVIGTVL  
VGPTPANIIGRNLMTQLGCTLNF

>82251\_1 500.0  
PQITLWQRPIVTVKIGGQLKEALLDTGADDTIFEEINLPGRWPKIAGGIGGFIKVRQYDQIPIEICGHEVIGTVL  
VGPTPANIIGRNLMTQLGCTLNF

>82251\_3 500.0  
PQITLWQRPIVTVKIGGQLKEALLDTGADDTIFEEINLPWKPKMAGGIGGFIKVRQYDQIPIEICGHEVIGTVL  
VGPTPANIIGRNLMTQLGCTLNF

>82251\_4 500.0  
PQITLWQRPIVTVKIGGQLKEALLDTGADDTIFEEINLPWKPKIAGGIGGFIKVRQYDQIPIEICGHEVIGTVLV  
GPTPANIIGRNLMTQLGCTLNF

>82251\_5 500.0  
PQITLWQRPIVTVKIGGQLKEALLDTGADDTIFEEINLPWKPKLAGGIGGFIKVRQYDQIPIEICGHEVIGTVL  
VGPTPANIIGRNLMTQLGCTLNF

>116999\_0 500.0  
PQITLWQRPVVTIKVGGQIKEALLDTGADDTILEEMNLPGRWPKIAGGIGGFIKVRQYDQIPIEICGHKVIGTV  
LIGPTPANIIGRNLLTQLGCTLNF

>116999\_1 500.0  
PQITLWQRPVVTIKVGGQIKEALLDTGADDTILEEMNLPGRWPKIAGGIGGFIKVRQYDQIPIEICGHEVIGTV  
LIGPTPANIIGRNLLTQLGCTLNF

>116999\_2 500.0  
PQITLWQRPVVTIKVGGQIKEALLDTGADDTILEEMNLPGRWPKIAGGIGGFIKVREYDQIPIEICGHKVIGTVL  
IGPTPANIIGRNLLTQLGCTLNF

>116999\_3 500.0  
PQITLWQRPVVTIKVGGQIKEALLDTGADDTILEEMNLPGRWPKIAGGIGGFIKVREYDQIPIEICGHEVIGTVL  
IGPTPANIIGRNLLTQLGCTLNF

>116999\_4 500.0  
PQITLWQRPVVTIKVGGQIKEALLDTGADDTILEEMNLPGRWPKIAGGIGGFINVRQYDQIPIEICGHKVIGTV  
LIGPTPANIIGRNLLTQLGCTLNF

>116999\_5 500.0  
PQITLWQRPVVTIKVGGQIKEALLDTGADDTILEEMNLPGRWPKIAGGIGGFINVRQYDQIPIEICGHEVIGTV  
LIGPTPANIIGRNLLTQLGCTLNF

>116999\_6 500.0  
PQITLWQRPVVTIKVGGQIKEALLDTGADDTILEEMNLPGRWPKIAGGIGGFINVREYDQIPIEICGHKVIGTVL  
IGPTPANIIGRNLLTQLGCTLNF

>116999\_7 500.0  
PQITLWQRPVVTIKVGGQIKEALLDTGADDTILEEMNLPGRWPKIAGGIGGFINVREYDQIPIEICGHEVIGTVL  
IGPTPANIIGRNLLTQLGCTLNF

>116999\_8 500.0  
PQITLWQRPVVTIKVGGQIKEALLDTGADDTIFEEMNLPGRWPKIAGGIGGFIKVRQYDQPIEICGHKVIKTV  
LIGPTPANIIGRNLLTQLGCTLNF

>116999\_9 500.0  
PQITLWQRPVVTIKVGGQIKEALLDTGADDTIFEEMNLPGRWPKIAGGIGGFIKVRQYDQPIEICGHEVIGTV  
LIGPTPANIIGRNLLTQLGCTLNF

>116999\_10 500.0  
PQITLWQRPVVTIKVGGQIKEALLDTGADDTIFEEMNLPGRWPKIAGGIGGFIKVRQYDQPIEICGHKVIKTVL  
IGPTPANIIGRNLLTQLGCTLNF

>116999\_11 500.0  
PQITLWQRPVVTIKVGGQIKEALLDTGADDTIFEEMNLPGRWPKIAGGIGGFIKVRQYDQPIEICGHEVIGTVL  
IGPTPANIIGRNLLTQLGCTLNF

>116999\_12 500.0  
PQITLWQRPVVTIKVGGQIKEALLDTGADDTIFEEMNLPGRWPKIAGGIGGFIVRQYDQPIEICGHKVIKTV  
LIGPTPANIIGRNLLTQLGCTLNF

>116999\_13 500.0  
PQITLWQRPVVTIKVGGQIKEALLDTGADDTIFEEMNLPGRWPKIAGGIGGFIVRQYDQPIEICGHEVIGTV  
LIGPTPANIIGRNLLTQLGCTLNF

>116999\_14 500.0  
PQITLWQRPVVTIKVGGQIKEALLDTGADDTIFEEMNLPGRWPKIAGGIGGFIVRQYDQPIEICGHKVIKTV  
LIGPTPANIIGRNLLTQLGCTLNF

>116999\_15 500.0  
PQITLWQRPVVTIKVGGQIKEALLDTGADDTIFEEMNLPGRWPKIAGGIGGFIVRQYDQPIEICGHEVIGTV  
LIGPTPANIIGRNLLTQLGCTLNF

>116999\_16 500.0  
PQITLWQRPVVTIKVGGQIKEALLDTGADDTIFEEMNLPGRWPKIAGGIGGFIKVRQYDQPIEICGHKVIKTV  
LIGPTPANIIGRNLLTQLGCTLNF

>117063\_0 500.0  
PQITLWQRPVVTIKVAGQLREALLDTGADDTIFEEMNLPGRWPKIAGGIGGFIVRQYDQPIEICGHKVIKTV  
LVGPTPANIIGRNLLTQLGCTLNF

>115739\_2 500.0  
PQITLWQRPVVTIKVGGQLREALLDTGADDTIFEDISLPGKWTPKIVGGIGGLIKVKQYDQPIEICGHKVIKTVL  
VGPTPANIIGRNLLTQLGCTLNF

>115739\_3 500.0  
PQITLWQRPVVTIKVGGQLREALLDTGADDTIFEDISLPGKWTPKIVGGIGGLIKVKQYDQPIEICGHKVIKTVL  
VGPTPANIIGRNLLTQLGCTLNF

>143473\_0 500.0  
PQITLWQRPVVTIKVGGQLREALLDTGADDTVFEDIDLPGRWTPKIVGGIGGFVVRQYDQVPIEICGHKIISTV  
LVGPTPANIIGRNLLTQLGCTLNF

>143473\_2 500.0  
PQITLWQRPVVTIKVGGQLREALLDTGADDTVFEDIDLPGRWTPKIVGGIGGFVVRQYDQVPIEICGHKVIKTV  
LVGPTPANIIGRNLLTQLGCTLNF

>143473\_4 500.0  
PQITLWQRPVVTIKVGGQLREALLDTGADDTVFEDIDLPGRWTPKIVGGIGGFVVRQYDQVPIEICGHKIISTV  
LVGPTPANIIGRNLLTQLGCTLNF

>143473\_6 500.0  
PQITLWQRPVVTIKVGGQLREALLDTGADDTVFEDIDLPGRWTPKIVGGIGGFVVRQYDQVPIEICGHKVIKTV  
LVGPTPANIIGRNLLTQLGCTLNF

>143473\_8 500.0  
PQITLWQRPVVTIKVGGQIREALLDTGADDTVFEDIDLPGRWTPKIVGGIGGFVVRQYDQVPIEICGHKIISTV  
LVGPTPANIIGRNLLTQLGCTLNF

>143473\_10 500.0  
PQITLWQRPVVTIKVGGQIREALLDTGADDTVFEDIDLPGRWTPKIVGGIGGFVVRQYDQVPIEICGHKVIKTV  
LVGPTPANIIGRNLLTQLGCTLNF

>143473\_12 500.0  
PQITLWQRPVVTIKVGGQIREALLDTGADDTVFEDIDLPGRWTPKIVGGIGGFVVRQYDQVPIEICGHKIISTV  
LVGPTPANIIGRNLLTQLGCTLNF

>143473\_14 500.0  
PQITLWQRPVVTIKVGGQIREALLDTGADDTVFEDIDLPGRWTPKIVGGIGGFVVRQYDQVPIEICGHKVIKTV  
LVGPTPANIIGRNLLTQLGCTLNF

>103067\_0 500.0  
PQITLWQRPVVTIKVGGQIREALLDTGADDTVFQEMNLPGRWPKIAGGIGGFVVRQYDQVPIEICGHKVIKTV  
LVGPTPANIIGRNLLTQLGCTLNF

>103067\_1 500.0  
PQITLWQRPFITVKIAGQVKEALLDTGADDTVFQEMNLPGRWIPKLIIGGIAGFMKVRQYDQIPMEIYGHKVMATV  
LVGPTPVNVIGRNLMTQIGCTLNF

>145212\_0 500.0  
PQITLWQRPIVTVKIAGQLKEALLDTGADDTIFEEMNLPGRWTPKLIIGGIGGFLKVRQYDQVPIECGHKVI  
GVPV  
LVGPTPVNVIGRNLMSQIGCTLNF

>107977\_0 500.0  
PQITLWQRPIVTIKIGGQLREALIDTGADDTVLEDMDLPGRWKPKIIGGIGGFVKVRQYDHVPVEICGHK  
VVGS  
VVVGPTPTNIIGRNLLTQLGCTLNF

>107977\_1 500.0  
PQITLWQRPIVTIKIGGQLREALIDTGADDTVLEDMDLPGRWKPKIIGGIGGFVKVKQYDHVPVEICGHK  
VVGS  
VVVGPTPTNIIGRNLLTQLGCTLNF

>107977\_2 500.0  
PQITLWQRPIVTIKIGGQLREALIDTGADDTVLEDMDLPGRWKPKIIGGIGGFVKVRQYDHVPVEICGHK  
VVGS  
VVVGPTPTNIIGRNLLTQLGCTLNF

>107977\_3 500.0  
PQITLWQRPIVTIKIGGQLREALIDTGADDTVLEDMDLPGRWKPKIIGGIGGFVKVKQYDHVPVEICGHK  
VVGS  
VVVGPTPTNIIGRNLLTQLGCTLNF

>117069\_0 500.0  
PQITLWQRPIVTVKIAGQLTEALLDTGADDTIFQDINLPGRWTPKIVGGIGLLRVRQYEQVPIEVCGHK  
IITTVL  
IGPTPVNVLGRNLMTQLGCTLNF

>117069\_1 500.0  
PQITLWQRPIVTVKVAGQLTEALLDTGADDTIFQDINLPGRWTPKIVGGIGLLRVRQYEQVPIEVCGHK  
IITTVL  
IGPTPVNVLGRNLMTQLGCTLNF

>117053\_0 500.0  
PQITLWQRPIVTIKIGGQLREALIDTGADDTVLEDINLPGRWKPKLIIGGIGGFVKVREYEEIPVEICGHK  
VIGTVL  
VGPTPFNVVGRNLLTQLGCTLNF

>117053\_1 500.0  
PQITLWQRPIVTIKIGGQLREALIDTGADDTVLEDINLPGRWKPKLIIGGIGGFVKVREYEEIPVEICGHK  
VIGTV  
LVGPTPFNVVGRNLLTQLGCTLNF

>117053\_2 500.0  
PQITLWQRPIVTIKIGGQLREALIDTGADDTVLEDINLPGRWKPKLIIGGIGGFVKVREYEEIPVDICGHK  
VIGTVL  
VGPTPFNVVGRNLLTQLGCTLNF

>117053\_3 500.0  
PQITLWQRPIVTIKIGGQLREALIDTGADDTVLEDINLPGRWKPKLIIGGIGGFVKVREYEEIPVDVCGHK  
VIGTV  
LVGPTPFNVVGRNLLTQLGCTLNF

>117053\_4 500.0  
PQITLWQRPIVTIKIGGQLREALIDTGADDTVLEDINLPGRWKPKLIIGGIGGFVKVREYEEIPVEICGHK  
VIGTV  
LVGPTPFNVVGRNLLTQLGCTLNF

>117053\_5 500.0  
PQITLWQRPIVTIKIGGQLREALIDTGADDTVLEDINLPGRWKPKLIIGGIGGFVKVREYEEIPVEICGHK  
VIGTV  
VLVGPTPFNVVGRNLLTQLGCTLNF

>117053\_6 500.0  
PQITLWQRPIVTIKIGGQLREALIDTGADDTVLEDINLPGRWKPKLIIGGIGGFVKVREYEEIPVDICGHK  
VIGTV  
LVGPTPFNVVGRNLLTQLGCTLNF

>117053\_7 500.0  
PQITLWQRPIVTIKIGGQLREALIDTGADDTVLEDINLPGRWKPKLIIGGIGGFVKVREYEEIPVDVCGHK  
VIGTV  
VLVGPTPFNVVGRNLLTQLGCTLNF

>117053\_8 500.0  
PQITLWQRPIVTIKIGGQLREALIDTGADDTVLEDINLPGRWKPKLIIGGIGGFVKVREYEEIPVEICGHK  
VIGTV  
LVGPTPFNVVGRNLLTQLGCTLNF

>117053\_9 500.0  
PQITLWQRPIVTIKIGGQLREALIDTGADDTVLEDINLPGRWKPKLIIGGIGGFVKVREYEEIPVEICGHK  
VIGTV  
VLVGPTPFNVVGRNLLTQLGCTLNF

>117053\_10 500.0  
PQITLWQRPIVTIKIGGQLREALIDTGADDTVLEDINLPGRWKPKLIIGGIGGFVKVREYEEIPVDICGHK  
VIGTV  
LVGPTPFNVVGRNLLTQLGCTLNF

>117053\_11 500.0  
PQITLWQRPIVTIKIGGQLREALIDTGADDTVLEDINLPGRWKPKLIIGGIGGFVKVREYEEIPVDVCGHK  
VIGTV  
VLVGPTPFNVVGRNLLTQLGCTLNF

>117053\_12 500.0  
PQITLWQRPIVTIKIGGQLREALIDTGADDTVLEDINLPGRWKPKLIIGGIGGFVKVREYEEIPVEICGHK  
VIGTV  
VLVGPTPFNVVGRNLLTQLGCTLNF

>117053\_13 500.0  
PQITLWQRPIVTIKVGGQLREALLDTGADDTVLEDINLPGRWPKKLIGGIGGFVKVREYEEVPVEVCGHKVIGT  
VLVGPTPFNVVGRNLLTQLGCTLNF  
>117053\_14 500.0  
PQITLWQRPIVTIKVGGQLREALLDTGADDTVLEDINLPGRWPKKLIGGIGGFVKVREYEEVPVDICGHKVIGT  
VLVGPTPFNVVGRNLLTQLGCTLNF  
>117053\_15 500.0  
PQITLWQRPIVTIKVGGQLREALLDTGADDTVLEDINLPGRWPKKLIGGIGGFVKVREYEEVPVDVCGHKVIGT  
VLVGPTPFNVVGRNLLTQLGCTLNF

**Sequences for the LPV-susceptible ensemble**

>81851\_0 0.3  
PQITLWQRPLVPIRIEQLKEALLDTGADDTVIEEMSLSGRWPKPKMIGGIGGFVKVQYEIQPIEICGHKAIGTVL  
VGPTPVNIIGRNLLTQLGCTLNF  
>102783\_3 0.3  
PQITLWQRPIVTTIKIGGQLKEALLDTGADDTVLEDMNLPGRWPKPKMIGGIGGFVKVQYDEVPLEICGHKVTGT  
VLIGSTPVNIIGRNLLTQLGCTLNF  
>102783\_2 0.3  
PQITLWQRPIVTTIKIGGQLKEALLDTGADDTVLEDMNLPGRWPKPKMIGGIGGFVKVQYDEVPLEICGHKVTGT  
VLIGATPVNIIGRNLLTQLGCTLNF  
>102782\_36 0.3  
PQITLWQRPIVTIKVEGQLKEAPLDTGADDTVLEDMNLPGRWPKPKMIGGLGGFIKVRQYDQIHIEICGHKVIGT  
VLVGPTPVNIIGRNMLTQIGCTLNF  
>102782\_173 0.3  
PQITLWQRPIVTIKVEGQLTEAPLDTGADDTVLEDVNLPGRWKPKMIGGLGGFIKVRQYDQIHIEICGHKVIGT  
VLVGPTPVNIIGRSMLTQIGCTLNF  
>102782\_174 0.3  
PQITLWQRPIVTIKVEGQLTEAPLDTGADDTVLEDVNLPGRWKPKMIGGLGGFIKVRQYDQIHIEICGHKVIGT  
VLIGPTPVNIIGRNMLTQIGCTLNF  
>102782\_175 0.3  
PQITLWQRPIVTIKVEGQLTEAPLDTGADDTVLEDVNLPGRWKPKMIGGLGGFIKVRQYDQIHIEICGHKVIGT  
VLIGPTPVNIIGRSMLTQIGCTLNF  
>102782\_180 0.3  
PQITLWQRPIVTIKVEGQLTEAPLDTGADDTVLEDVNLPGRWKPKMIGGLGGFIKVRQYDQIHIEICGHKVIGT  
VLVGPTPVNIIGRNMLTQIGCTLNF  
>102782\_181 0.3  
PQITLWQRPIVTIKVEGQLTEAPLDTGADDTVLEDVNLPGRWKPKMIGGLGGFIKVRQYDQIHIEICGHKVIGT  
VLVGPTPVNIIGRSMLTQIGCTLNF  
>102782\_182 0.3  
PQITLWQRPIVTIKVEGQLTEAPLDTGADDTVLEDVNLPGRWKPKMIGGLGGFIKVRQYDQIHIEICGHKVIGT  
VLIGPTPVNIIGRNMLTQIGCTLNF  
>102782\_183 0.3  
PQITLWQRPIVTIKVEGQLTEAPLDTGADDTVLEDVNLPGRWKPKMIGGLGGFIKVRQYDQIHIEICGHKVIGT  
VLIGPTPVNIIGRSMLTQIGCTLNF  
>102782\_188 0.3  
PQITLWQRPIVTIKVEGQLTEAPLDTGADDTVLEDVNLPGRWKPKMIGGLGGFIKVRQYDQIHIEICGHKVIGT  
VLVGPTPVNIIGRNMLTQIGCTLNF  
>102782\_189 0.3  
PQITLWQRPIVTIKVEGQLTEAPLDTGADDTVLEDVNLPGRWKPKMIGGLGGFIKVRQYDQIHIEICGHKVIGT  
VLVGPTPVNIIGRSMLTQIGCTLNF  
>102782\_190 0.3  
PQITLWQRPIVTIKVEGQLTEAPLDTGADDTVLEDVNLPGRWKPKMIGGLGGFIKVRQYDQIHIEICGHKVIGT  
VLIGPTPVNIIGRNMLTQIGCTLNF  
>102782\_191 0.3  
PQITLWQRPIVTIKVEGQLTEAPLDTGADDTVLEDVNLPGRWKPKMIGGLGGFIKVRQYDQIHIEICGHKVIGT  
VLIGPTPVNIIGRSMLTQIGCTLNF  
>102782\_32 0.3  
PQITLWQRPIVTIKVEGQLKEAPLDTGADDTVLEDMNLPGRWPKPKMIGGLGGFIKVRQYDQIHIEICGHKAIGT  
VLVGPTPVNIIGRNMLTQIGCTLNF  
>102782\_33 0.3  
PQITLWQRPIVTIKVEGQLKEAPLDTGADDTVLEDMNLPGRWPKPKMIGGLGGFIKVRQYDQIHIEICGHKAIGT  
VLVGPTPVNIIGRSMLTQIGCTLNF  
>102782\_34 0.3



PQITLWQRPIVTIKVEGQLKEAPLDTGADDTVLEDMNLPGRWPKPKMIGGLGGFIKVRQYDQIHIEICGHKAIGT  
VLIGPTPVNIIGRNMLTQIGCTLNF  
>102782\_35 0.3  
PQITLWQRPIVTIKVEGQLKEAPLDTGADDTVLEDMNLPGRWPKPKMIGGLGGFIKVRQYDQIHIEICGHKAIGT  
VLIGPTPVNIIGRSMLTQIGCTLNF  
>102782\_40 0.3  
PQITLWQRPIVTIKVEGQLKEAPLDTGADDTVLEDVNLPGRWPKPKMIGGLGGFIKVRQYDQIHIEICGHKAIGT  
VLVGPTPVNIIGRNMLTQIGCTLNF  
>102782\_41 0.3  
PQITLWQRPIVTIKVEGQLKEAPLDTGADDTVLEDVNLPGRWPKPKMIGGLGGFIKVRQYDQIHIEICGHKAIGT  
VLVGPTPVNIIGRSMLTQIGCTLNF  
>102782\_59 0.3  
PQITLWQRPIVTIKVEGQLKEAPLDTGADDTVLEDVNLPGRWPKPKMIGGLGGFIKVRQYDQIHIEICGHKAIGT  
VLIGPTPVNIIGRSMLTQIGCTLNF  
>102782\_160 0.3  
PQITLWQRPIVTIKVEGQLTEAPLDTGADDTVLEDMNLPGRWPKPKMIGGLGGFIKVRQYDQIHIEICGHKAIGT  
VLVGPTPVNIIGRNMLTQIGCTLNF  
>102782\_161 0.3  
PQITLWQRPIVTIKVEGQLTEAPLDTGADDTVLEDMNLPGRWPKPKMIGGLGGFIKVRQYDQIHIEICGHKAIGT  
VLVGPTPVNIIGRSMLTQIGCTLNF  
>102782\_162 0.3  
PQITLWQRPIVTIKVEGQLTEAPLDTGADDTVLEDMNLPGRWPKPKMIGGLGGFIKVRQYDQIHIEICGHKAIGT  
VLIGPTPVNIIGRNMLTQIGCTLNF  
>102782\_163 0.3  
PQITLWQRPIVTIKVEGQLTEAPLDTGADDTVLEDMNLPGRWPKPKMIGGLGGFIKVRQYDQIHIEICGHKAIGT  
VLIGPTPVNIIGRSMLTQIGCTLNF  
>102783\_1 0.3  
PQITLWQRPIITIKIGGQLKEALLDTGADDTVLEDMNLPGRWPKPKMIGGIGGFIKVRQYDEVPLEICGHKVTGT  
VLIGSTPVNIIGRNLLTQLGCTLNF  
>102782\_4 0.3  
PQITLWQRPIVTIKVEGQLKEALLDTGADDTVLEDMNLPGRWPKPKMIGGLGGFIKVRQYDQIHIEICGHKVIKT  
VLVGPTPVNIIGRNMLTQIGCTLNF  
>102782\_5 0.3  
PQITLWQRPIVTIKVEGQLKEALLDTGADDTVLEDMNLPGRWPKPKMIGGLGGFIKVRQYDQIHIEICGHKVIKT  
VLVGPTPVNIIGRSMLTQIGCTLNF  
>102782\_6 0.3  
PQITLWQRPIVTIKVEGQLKEALLDTGADDTVLEDMNLPGRWPKPKMIGGLGGFIKVRQYDQIHIEICGHKVIKT  
VLIGPTPVNIIGRNMLTQIGCTLNF  
>102782\_0 0.3  
PQITLWQRPIVTIKVEGQLKEALLDTGADDTVLEDMNLPGRWPKPKMIGGLGGFIKVRQYDQIHIEICGHKAIGT  
VLVGPTPVNIIGRNMLTQIGCTLNF  
>102782\_10 0.3  
PQITLWQRPIVTIKVEGQLKEALLDTGADDTVLEDVNLPGRWPKPKMIGGLGGFIKVRQYDQIHIEICGHKAIGT  
VLIGPTPVNIIGRNMLTQIGCTLNF  
>102782\_11 0.3  
PQITLWQRPIVTIKVEGQLKEALLDTGADDTVLEDVNLPGRWPKPKMIGGLGGFIKVRQYDQIHIEICGHKAIGT  
VLIGPTPVNIIGRSMLTQIGCTLNF  
>102782\_16 0.3  
PQITLWQRPIVTIKVEGQLKEALLDTGADDTVLEDVNLPGRWPKPKMIGGLGGFIKVRQYDQIHIEICGHKAIGT  
VLVGPTPVNIIGRNMLTQIGCTLNF  
>102782\_17 0.3  
PQITLWQRPIVTIKVEGQLKEALLDTGADDTVLEDVNLPGRWPKPKMIGGLGGFIKVRQYDQIHIEICGHKAIGT  
VLVGPTPVNIIGRSMLTQIGCTLNF  
>102782\_129 0.3  
PQITLWQRPIVTIKVEGQLTEALLDTGADDTVLEDMNLPGRWPKPKMIGGLGGFIKVRQYDQIHIEICGHKAIGT  
VLVGPTPVNIIGRSMLTQIGCTLNF  
>10574\_1 0.3  
PQITLLQRPLVTIKIGGQIKEALLDTGADDTVLEGIELPGRWPKPKMIGGIGGFIKVRQYEQVPVEICGHKAIGTVL  
VGPTPVDIIGRNLMTQLGCTLNF  
>105308\_14 0.3  
PQITLWQRPIVTIKVGGQLKEALIDTGADDTVLEEIELPGRWPKPKIIGGIGGFVKVRQYDQIPIEICGHKIIGTVL  
VGPTPTNIIGRNLLTQIGCTLNF  
>105308\_27 0.3

PQITLWQRPIVTVRVGGQLKEALIDTGADDTVLEEIELPGRWPKKIIGGIGGFVKVRQYDQIPIEICGHKIVIGTV  
VGPTPTNIIGRNLLTQLGCTLNF  
>105308\_30 0.3  
PQITLWQRPIVTVRVGGQLKEALIDTGADDTVLEEIELPGRWPKKIIGGIGGFVKVRQYDQIPIEICGHKIIGTV  
VGPTPTNIIGRNLLTQIGCTLNF  
>105308\_31 0.3  
PQITLWQRPIVTVRVGGQLKEALIDTGADDTVLEEIELPGRWPKKIIGGIGGFVKVRQYDQIPIEICGHKIIGTV  
VGPTPTNIIGRNLLTQLGCTLNF  
>105308\_34 0.3  
PQITLWQRPVVTVKVGGLKEALIDTGADDTVLEEMELPGRWPKKIIGGIGGFVKVRQYDQIPIEICGHKIVIGT  
VLVGPTPTNIIGRNLLTQIGCTLNF  
>105308\_35 0.3  
PQITLWQRPVVTVKVGGLKEALIDTGADDTVLEEMELPGRWPKKIIGGIGGFVKVRQYDQIPIEICGHKIVIGT  
VLVGPTPTNIIGRNLLTQLGCTLNF  
>105308\_38 0.3  
PQITLWQRPVVTVKVGGLKEALIDTGADDTVLEEMELPGRWPKKIIGGIGGFVKVRQYDQIPIEICGHKIIGTV  
LVGPTPTNIIGRNLLTQIGCTLNF  
>105308\_39 0.3  
PQITLWQRPVVTVKVGGLKEALIDTGADDTVLEEMELPGRWPKKIIGGIGGFVKVRQYDQIPIEICGHKIIGTV  
LVGPTPTNIIGRNLLTQLGCTLNF  
>105308\_42 0.3  
PQITLWQRPVVTVKVGGLKEALIDTGADDTVLEEIELPGRWPKKIIGGIGGFVKVRQYDQIPIEICGHKIVIGTV  
LVGPTPTNIIGRNLLTQIGCTLNF  
>105308\_43 0.3  
PQITLWQRPVVTVKVGGLKEALIDTGADDTVLEEIELPGRWPKKIIGGIGGFVKVRQYDQIPIEICGHKIVIGTV  
LVGPTPTNIIGRNLLTQLGCTLNF  
>105308\_46 0.3  
PQITLWQRPVVTVKVGGLKEALIDTGADDTVLEEIELPGRWPKKIIGGIGGFVKVRQYDQIPIEICGHKIIGTV  
VGPTPTNIIGRNLLTQIGCTLNF  
>105308\_47 0.3  
PQITLWQRPVVTVKVGGLKEALIDTGADDTVLEEIELPGRWPKKIIGGIGGFVKVRQYDQIPIEICGHKIIGTV  
VGPTPTNIIGRNLLTQLGCTLNF  
>105308\_50 0.3  
PQITLWQRPVVTVRVGGQLKEALIDTGADDTVLEEMELPGRWPKKIIGGIGGFVKVRQYDQIPIEICGHKIVIGT  
VLVGPTPTNIIGRNLLTQIGCTLNF  
>105308\_51 0.3  
PQITLWQRPVVTVRVGGQLKEALIDTGADDTVLEEMELPGRWPKKIIGGIGGFVKVRQYDQIPIEICGHKIVIGT  
VLVGPTPTNIIGRNLLTQLGCTLNF  
>105308\_54 0.3  
PQITLWQRPVVTVRVGGQLKEALIDTGADDTVLEEMELPGRWPKKIIGGIGGFVKVRQYDQIPIEICGHKIIGTV  
LVGPTPTNIIGRNLLTQIGCTLNF  
>105308\_55 0.3  
PQITLWQRPVVTVRVGGQLKEALIDTGADDTVLEEMELPGRWPKKIIGGIGGFVKVRQYDQIPIEICGHKIIGTV  
LVGPTPTNIIGRNLLTQLGCTLNF  
>105308\_58 0.3  
PQITLWQRPVVTVRVGGQLKEALIDTGADDTVLEEIELPGRWPKKIIGGIGGFVKVRQYDQIPIEICGHKIVIGTV  
LVGPTPTNIIGRNLLTQIGCTLNF  
>105308\_59 0.3  
PQITLWQRPVVTVRVGGQLKEALIDTGADDTVLEEIELPGRWPKKIIGGIGGFVKVRQYDQIPIEICGHKIVIGTV  
LVGPTPTNIIGRNLLTQLGCTLNF  
>105308\_62 0.3  
PQITLWQRPVVTVRVGGQLKEALIDTGADDTVLEEIELPGRWPKKIIGGIGGFVKVRQYDQIPIEICGHKIIGTV  
VGPTPTNIIGRNLLTQIGCTLNF  
>105308\_63 0.3  
PQITLWQRPVVTVRVGGQLKEALIDTGADDTVLEEIELPGRWPKKIIGGIGGFVKVRQYDQIPIEICGHKIIGTV  
VGPTPTNIIGRNLLTQLGCTLNF  
>75054\_0 0.3  
PQITLWQRPLVTIKIGGLKEALLDTGADDTVLEEMNLPGRWPKMIIGGIGGFVKVRQYDQITIEICGHKAIGTV  
LVGPTPVNIIGRNLLTQIGCTLNF  
>75054\_2 0.3  
PQITLWQRPLVTIKIGGLKEALLDTGADDTVLEEMNLPGRWPKMIIGGIGGFVKVRQYDQITIDICGHKAIGTV  
LVGPTPVNIIGRNLLTQIGCTLNF  
>75054\_4 0.3

PQITLWQRPLVTIKIGGQLKEALLDTGADDTVLEEINLPGRWPKMIGGIGGFIKVRQYDQITIEICGHKAIGTV  
VGPTPVNIIGRNLLTQIGCTLNF  
>75054\_6 0.3  
PQITLWQRPLVTIKIGGQLKEALLDTGADDTVLEEINLPGRWPKMIGGIGGFIKVRQYDQITIDICGHKAIGTV  
VGPTPVNIIGRNLLTQIGCTLNF  
>75054\_8 0.3  
PQITLWQRPIVTIKIGGQLKEALLDTGADDTVLEEMNLPGRWPKMIGGIGGFIKVRQYDQITIEICGHKAIGTV  
LVGPTPVNIIGRNLLTQIGCTLNF  
>75054\_10 0.3  
PQITLWQRPIVTIKIGGQLKEALLDTGADDTVLEEMNLPGRWPKMIGGIGGFIKVRQYDQITIDICGHKAIGTV  
LVGPTPVNIIGRNLLTQIGCTLNF  
>75054\_12 0.3  
PQITLWQRPIVTIKIGGQLKEALLDTGADDTVLEEINLPGRWPKMIGGIGGFIKVRQYDQITIEICGHKAIGTV  
VGPTPVNIIGRNLLTQIGCTLNF  
>75054\_14 0.3  
PQITLWQRPIVTIKIGGQLKEALLDTGADDTVLEEINLPGRWPKMIGGIGGFIKVRQYDQITIDICGHKAIGTV  
VGPTPVNIIGRNLLTQIGCTLNF  
>75114\_0 0.3  
PQITLWQRPLVTIKIGGQLKEALLDTGADDTVLEDMDLPGRWPKMIGGIGGFIKVRQYDQISIEICGHKAIGTV  
LVGPTPINIIGRNLLTQIGCTLNF  
>148111\_0 0.2  
PQITLWQRPLVTIKIGGQLKEALLDTGADDTVLEEMNLPGRWPKMIGGIGGFIKVRQYDQISMEICGHKAIG  
TVLIGPTPVNIIGRNLLTQIGCTLNF  
>148111\_1 0.2  
PQITLWQRPLVTIKIGGQLKEALLDTGADDTVLEEMNLPGRWPKMIGGIGGFIKVRQYDQVSMEICGHKAIG  
TVLIGPTPVNIIGRNLLTQIGCTLNF  
>9706\_0 0.3  
PQITLWQRPLVTIKIGGQLKEALLDTGADDTVLEDMDLPGRWPKMIGGIGGFIKVRQYDQILIEICGHKAIGTV  
LVGPTPVNIIGRNLLTQIGCTLNF  
>187173\_0 0.2  
PQITLWQRPLVTIKIGGQLKEALLDTGADDTVLEDINLPGWKPKMIGGIGGFIKVRQYDQILIEICGKKAIGTV  
VGPTPVNIIGRNMLTQIGCTLNF  
>187173\_1 0.2  
PQITLWQRPLVTIKIGGQLKEALLDTGADDTVLEDINLPGWKPKMIGGIGGFIKVRQYDQILIEICGKKAIGTV  
IGPTPVNIIGRNMLTQIGCTLNF  
>187173\_2 0.2  
PQITLWQRPLVTIKIGGQLKEALLDTGADDTVLEDINLPGNWPKMIGGIGGFIKVRQYDQILIEICGKKAIGTV  
LVGPTPVNIIGRNMLTQIGCTLNF  
>187173\_3 0.2  
PQITLWQRPLVTIKIGGQLKEALLDTGADDTVLEDINLPGNWPKMIGGIGGFIKVRQYDQILIEICGKKAIGTV  
LIGPTPVNIIGRNMLTQIGCTLNF  
>187173\_4 0.2  
PQITLWQRPLVTIKIGGQLTEALLDTGADDTVLEDINLPGWKPKMIGGIGGFIKVRQYDQILIEICGKKAIGTV  
VGPTPVNIIGRNMLTQIGCTLNF  
>187173\_5 0.2  
PQITLWQRPLVTIKIGGQLTEALLDTGADDTVLEDINLPGWKPKMIGGIGGFIKVRQYDQILIEICGKKAIGTV  
IGPTPVNIIGRNMLTQIGCTLNF  
>187173\_6 0.2  
PQITLWQRPLVTIKIGGQLTEALLDTGADDTVLEDINLPGNWPKMIGGIGGFIKVRQYDQILIEICGKKAIGTV  
VGPTPVNIIGRNMLTQIGCTLNF  
>187173\_7 0.2  
PQITLWQRPLVTIKIGGQLTEALLDTGADDTVLEDINLPGNWPKMIGGIGGFIKVRQYDQILIEICGKKAIGTV  
IGPTPVNIIGRNMLTQIGCTLNF  
>187173\_8 0.2  
PQITLWQRPLVTIKIGGQLTEALLDTGADDTVLEDINLPGWKPKMIGGIGGFIKVRQYDQILIEICGKKAIGTV  
LVGPTPVNIIGRNMLTQIGCTLNF  
>187173\_9 0.2  
PQITLWQRPLVTIKIGGQLTEALLDTGADDTVLEDINLPGWKPKMIGGIGGFIKVRQYDQILIEICGKKAIGTV  
LIGPTPVNIIGRNMLTQIGCTLNF  
>187173\_10 0.2  
PQITLWQRPLVTIKIGGQLTEALLDTGADDTVLEDINLPGNWPKMIGGIGGFIKVRQYDQILIEICGKKAIGTV  
LVGPTPVNIIGRNMLTQIGCTLNF  
>187173\_11 0.2

PQITLWQRPLVTVRIGGQLKEALLDTGADDTVLEDINLPGNWPKPMIGGIGGFIKVRQYDQILIEICGKKAIGTV  
LIGTPVNIIGRNMLTQIGCTLNF  
>187173\_12 0.2  
PQITLWQRPLVTVRIGGQLTEALLDTGADDTVLEDINLPGKWKPKMIGGIGGFIKVRQYDQILIEICGKKAIGTVL  
VGPTPVNIIGRNMLTQIGCTLNF  
>187173\_13 0.2  
PQITLWQRPLVTVRIGGQLTEALLDTGADDTVLEDINLPGKWKPKMIGGIGGFIKVRQYDQILIEICGKKAIGTVL  
IGPTPVNIIGRNMLTQIGCTLNF  
>187173\_14 0.2  
PQITLWQRPLVTVRIGGQLTEALLDTGADDTVLEDINLPGNWPKPMIGGIGGFIKVRQYDQILIEICGKKAIGTVL  
VGPTPVNIIGRNMLTQIGCTLNF  
>187173\_15 0.2  
PQITLWQRPLVTVRIGGQLTEALLDTGADDTVLEDINLPGNWPKPMIGGIGGFIKVRQYDQILIEICGKKAIGTVL  
IGPTPVNIIGRNMLTQIGCTLNF  
>187173\_16 0.2  
PQITLWQRPIVTVKIGGQLKEALLDTGADDTVLEDINLPGKWKPKMIGGIGGFIKVRQYDQILIEICGKKAIGTVL  
VGPTPVNIIGRNMLTQIGCTLNF  
>187173\_17 0.2  
PQITLWQRPIVTVKIGGQLKEALLDTGADDTVLEDINLPGKWKPKMIGGIGGFIKVRQYDQILIEICGKKAIGTVL  
IGPTPVNIIGRNMLTQIGCTLNF  
>187173\_18 0.2  
PQITLWQRPIVTVKIGGQLKEALLDTGADDTVLEDINLPGNWPKPMIGGIGGFIKVRQYDQILIEICGKKAIGTVL  
VGPTPVNIIGRNMLTQIGCTLNF  
>187173\_19 0.2  
PQITLWQRPIVTVKIGGQLKEALLDTGADDTVLEDINLPGNWPKPMIGGIGGFIKVRQYDQILIEICGKKAIGTVL  
IGPTPVNIIGRNMLTQIGCTLNF  
>187173\_20 0.2  
PQITLWQRPIVTVKIGGQLTEALLDTGADDTVLEDINLPGKWKPKMIGGIGGFIKVRQYDQILIEICGKKAIGTVL  
VGPTPVNIIGRNMLTQIGCTLNF  
>187173\_21 0.2  
PQITLWQRPIVTVKIGGQLTEALLDTGADDTVLEDINLPGKWKPKMIGGIGGFIKVRQYDQILIEICGKKAIGTVLI  
GPTPVNIIGRNMLTQIGCTLNF  
>187173\_22 0.2  
PQITLWQRPIVTVKIGGQLTEALLDTGADDTVLEDINLPGNWPKPMIGGIGGFIKVRQYDQILIEICGKKAIGTVL  
VGPTPVNIIGRNMLTQIGCTLNF  
>187173\_23 0.2  
PQITLWQRPIVTVKIGGQLTEALLDTGADDTVLEDINLPGNWPKPMIGGIGGFIKVRQYDQILIEICGKKAIGTVLI  
GPTPVNIIGRNMLTQIGCTLNF  
>187173\_24 0.2  
PQITLWQRPIVTVRIGGQLKEALLDTGADDTVLEDINLPGKWKPKMIGGIGGFIKVRQYDQILIEICGKKAIGTVL  
VGPTPVNIIGRNMLTQIGCTLNF  
>187173\_25 0.2  
PQITLWQRPIVTVRIGGQLKEALLDTGADDTVLEDINLPGKWKPKMIGGIGGFIKVRQYDQILIEICGKKAIGTVL  
IGPTPVNIIGRNMLTQIGCTLNF  
>187173\_26 0.2  
PQITLWQRPIVTVRIGGQLKEALLDTGADDTVLEDINLPGNWPKPMIGGIGGFIKVRQYDQILIEICGKKAIGTVL  
VGPTPVNIIGRNMLTQIGCTLNF  
>187173\_27 0.2  
PQITLWQRPIVTVRIGGQLKEALLDTGADDTVLEDINLPGNWPKPMIGGIGGFIKVRQYDQILIEICGKKAIGTVL  
IGPTPVNIIGRNMLTQIGCTLNF  
>187173\_28 0.2  
PQITLWQRPIVTVRIGGQLTEALLDTGADDTVLEDINLPGKWKPKMIGGIGGFIKVRQYDQILIEICGKKAIGTVL  
VGPTPVNIIGRNMLTQIGCTLNF  
>187173\_29 0.2  
PQITLWQRPIVTVRIGGQLTEALLDTGADDTVLEDINLPGKWKPKMIGGIGGFIKVRQYDQILIEICGKKAIGTVLI  
GPTPVNIIGRNMLTQIGCTLNF  
>187173\_30 0.2  
PQITLWQRPIVTVRIGGQLTEALLDTGADDTVLEDINLPGNWPKPMIGGIGGFIKVRQYDQILIEICGKKAIGTVL  
VGPTPVNIIGRNMLTQIGCTLNF  
>187173\_31 0.2  
PQITLWQRPIVTVRIGGQLTEALLDTGADDTVLEDINLPGNWPKPMIGGIGGFIKVRQYDQILIEICGKKAIGTVL  
IGPTPVNIIGRNMLTQIGCTLNF

### Sequences for the NFV-resistant ensemble

>107985\_112 600.0

PQITLWQRPLVAVKIGGQIIEALLDTGADNTVLENIELPGRWKPKMIGGIGGFIKVRQYEEIPIEICGHKVTGTVL  
VGPTPVNIIGRDLMTQIGCTLNF

>107985\_217 600.0

PQITLWQRPLIAIKIGGQIIEALLDTGADNTVLENIELPGRWKPKMIGGIGGLIKVRQYEEIPIEICGHKVTGTVL  
GPTPVDIIGRDLMTQIGCTLNF

>107985\_219 600.0

PQITLWQRPLIAIKIGGQIIEALLDTGADNTVLENIELPGRWKPKMIGGIGGLIKVREYEEIPIEICGHKVTGTVL  
GPTPVDIIGRDLMTQIGCTLNF

>107985\_220 600.0

PQITLWQRPLIAIKIGGQIIEALLDTGADNTVLENIELPGRWKPKMIGGIGGLVKVRQYEEIPIEICGHKVTGTVL  
GPTPVNIIGRDLMTQIGCTLNF

>107985\_221 600.0

PQITLWQRPLIAIKIGGQIIEALLDTGADNTVLENIELPGRWKPKMIGGIGGLVKVRQYEEIPIEICGHKVTGTVL  
GPTPVDIIGRDLMTQIGCTLNF

>107985\_222 600.0

PQITLWQRPLIAIKIGGQIIEALLDTGADNTVLENIELPGRWKPKMIGGIGGLVKVREYEEIPIEICGHKVTGTVL  
GPTPVNIIGRDLMTQIGCTLNF

>107985\_223 600.0

PQITLWQRPLIAIKIGGQIIEALLDTGADNTVLENIELPGRWKPKMIGGIGGLVKVREYEEIPIEICGHKVTGTVL  
GPTPVDIIGRDLMTQIGCTLNF

>107985\_224 600.0

PQITLWQRPLIAVKIGGQIIEALLDTGADNTVLENIIDLPGRWKPKMIGGIGGFIKVRQYEEIPIEICGHKVTGTVL  
GPTPVNIIGRDLMTQIGCTLNF

>107985\_225 600.0

PQITLWQRPLIAVKIGGQIIEALLDTGADNTVLENIIDLPGRWKPKMIGGIGGFIKVRQYEEIPIEICGHKVTGTVL  
GPTPVDIIGRDLMTQIGCTLNF

>107985\_226 600.0

PQITLWQRPLIAVKIGGQIIEALLDTGADNTVLENIIDLPGRWKPKMIGGIGGFIKVRQYEEIPIEICGHKVTGTVL  
GPTPVNIIGRDLMTQIGCTLNF

>107985\_227 600.0

PQITLWQRPLIAVKIGGQIIEALLDTGADNTVLENIIDLPGRWKPKMIGGIGGFIKVRQYEEIPIEICGHKVTGTVL  
GPTPVDIIGRDLMTQIGCTLNF

>107985\_228 600.0

PQITLWQRPLIAVKIGGQIIEALLDTGADNTVLENIIDLPGRWKPKMIGGIGGFVKVRQYEEIPIEICGHKVTGTVL  
VGPTPVNIIGRDLMTQIGCTLNF

>107985\_229 600.0

PQITLWQRPLIAVKIGGQIIEALLDTGADNTVLENIIDLPGRWKPKMIGGIGGFVKVRQYEEIPIEICGHKVTGTVL  
VGPTPVDIIGRDLMTQIGCTLNF

>107985\_230 600.0

PQITLWQRPLIAVKIGGQIIEALLDTGADNTVLENIIDLPGRWKPKMIGGIGGFVKVREYEEIPIEICGHKVTGTVL  
VGPTPVNIIGRDLMTQIGCTLNF

>107985\_231 600.0

PQITLWQRPLIAVKIGGQIIEALLDTGADNTVLENIIDLPGRWKPKMIGGIGGFVKVREYEEIPIEICGHKVTGTVL  
VGPTPVDIIGRDLMTQIGCTLNF

>107985\_232 600.0

PQITLWQRPLIAVKIGGQIIEALLDTGADNTVLENIIDLPGRWKPKMIGGIGGLIKVRQYEEIPIEICGHKVTGTVL  
GPTPVNIIGRDLMTQIGCTLNF

>107985\_233 600.0

PQITLWQRPLIAVKIGGQIIEALLDTGADNTVLENIIDLPGRWKPKMIGGIGGLIKVRQYEEIPIEICGHKVTGTVL  
GPTPVDIIGRDLMTQIGCTLNF

>107985\_234 600.0

PQITLWQRPLIAVKIGGQIIEALLDTGADNTVLENIIDLPGRWKPKMIGGIGGLIKVREYEEIPIEICGHKVTGTVL  
GPTPVNIIGRDLMTQIGCTLNF

>107985\_235 600.0

PQITLWQRPLIAVKIGGQIIEALLDTGADNTVLENIIDLPGRWKPKMIGGIGGLIKVREYEEIPIEICGHKVTGTVL  
GPTPVDIIGRDLMTQIGCTLNF

>107985\_236 600.0

PQITLWQRPLIAVKIGGQIIEALLDTGADNTVLENIIDLPGRWKPKMIGGIGGLVKVRQYEEIPIEICGHKVTGTVL  
VGPTPVNIIGRDLMTQIGCTLNF

>107985\_237 600.0

PQITLWQRPLIAVKIGGQIIEALLDTGADNTVLENIIDLPGRWKPKMIGGIGGLVKVRQYEEIPIEICGHKVTGTVL

VGPTPVDIIGRDLMQTQIGCTLNF  
>107985\_238 600.0  
PQITLWQRPLIAVKIGGGQIIEALLDTGADNTVLENI DL PGRWPKPKMIGGIGGLVKVREYEEIPIEICGHKVTGTVL  
VGPTPVNIIIGRDLMQTQIGCTLNF  
>107985\_239 600.0  
PQITLWQRPLIAVKIGGGQIIEALLDTGADNTVLENI DL PGRWPKPKMIGGIGGLVKVREYEEIPIEICGHKVTGTVL  
VGPTPVDIIGRDLMQTQIGCTLNF  
>107985\_240 600.0  
PQITLWQRPLIAVKIGGGQIIEALLDTGADNTVLENI EL PGRWPKPKMIGGIGGFVKVRQYEEIPIEICGHKVTGTVLV  
GPTPVNIIIGRDLMQTQIGCTLNF  
>107985\_241 600.0  
PQITLWQRPLIAVKIGGGQIIEALLDTGADNTVLENI EL PGRWPKPKMIGGIGGFVKVRQYEEIPIEICGHKVTGTVLV  
GPTPVDIIGRDLMQTQIGCTLNF  
>107985\_242 600.0  
PQITLWQRPLIAVKIGGGQIIEALLDTGADNTVLENI EL PGRWPKPKMIGGIGGFVKVREYEEIPIEICGHKVTGTVLV  
GPTPVNIIIGRDLMQTQIGCTLNF  
>107985\_243 600.0  
PQITLWQRPLIAVKIGGGQIIEALLDTGADNTVLENI EL PGRWPKPKMIGGIGGFVKVREYEEIPIEICGHKVTGTVLV  
GPTPVDIIGRDLMQTQIGCTLNF  
>107985\_244 600.0  
PQITLWQRPLIAVKIGGGQIIEALLDTGADNTVLENI EL PGRWPKPKMIGGIGGFVKVRQYEEIPIEICGHKVTGTVL  
VGPTPVNIIIGRDLMQTQIGCTLNF  
>107985\_245 600.0  
PQITLWQRPLIAVKIGGGQIIEALLDTGADNTVLENI EL PGRWPKPKMIGGIGGFVKVRQYEEIPIEICGHKVTGTVL  
VGPTPVDIIGRDLMQTQIGCTLNF  
>107985\_246 600.0  
PQITLWQRPLIAVKIGGGQIIEALLDTGADNTVLENI EL PGRWPKPKMIGGIGGFVKVREYEEIPIEICGHKVTGTVL  
VGPTPVNIIIGRDLMQTQIGCTLNF  
>107985\_247 600.0  
PQITLWQRPLIAVKIGGGQIIEALLDTGADNTVLENI EL PGRWPKPKMIGGIGGFVKVREYEEIPIEICGHKVTGTVL  
VGPTPVDIIGRDLMQTQIGCTLNF  
>107985\_248 600.0  
PQITLWQRPLIAVKIGGGQIIEALLDTGADNTVLENI EL PGRWPKPKMIGGIGGLIKVRQYEEIPIEICGHKVTGTVLV  
GPTPVNIIIGRDLMQTQIGCTLNF  
>107985\_249 600.0  
PQITLWQRPLIAVKIGGGQIIEALLDTGADNTVLENI EL PGRWPKPKMIGGIGGLIKVRQYEEIPIEICGHKVTGTVLV  
GPTPVDIIGRDLMQTQIGCTLNF  
>107985\_250 600.0  
PQITLWQRPLIAVKIGGGQIIEALLDTGADNTVLENI EL PGRWPKPKMIGGIGGLIKVREYEEIPIEICGHKVTGTVLV  
GPTPVNIIIGRDLMQTQIGCTLNF  
>107985\_251 600.0  
PQITLWQRPLIAVKIGGGQIIEALLDTGADNTVLENI EL PGRWPKPKMIGGIGGLIKVREYEEIPIEICGHKVTGTVLV  
GPTPVDIIGRDLMQTQIGCTLNF  
>107985\_252 600.0  
PQITLWQRPLIAVKIGGGQIIEALLDTGADNTVLENI EL PGRWPKPKMIGGIGGLVKVRQYEEIPIEICGHKVTGTVL  
VGPTPVNIIIGRDLMQTQIGCTLNF  
>107985\_253 600.0  
PQITLWQRPLIAVKIGGGQIIEALLDTGADNTVLENI EL PGRWPKPKMIGGIGGLVKVRQYEEIPIEICGHKVTGTVL  
VGPTPVDIIGRDLMQTQIGCTLNF  
>107985\_254 600.0  
PQITLWQRPLIAVKIGGGQIIEALLDTGADNTVLENI EL PGRWPKPKMIGGIGGLVKVREYEEIPIEICGHKVTGTVL  
VGPTPVNIIIGRDLMQTQIGCTLNF  
>107985\_255 600.0  
PQITLWQRPLIAVKIGGGQIIEALLDTGADNTVLENI EL PGRWPKPKMIGGIGGLVKVREYEEIPIEICGHKVTGTVL  
VGPTPVDIIGRDLMQTQIGCTLNF  
>123049\_0 600.0  
PQITLWQRPIITIKIGGQLKDVLM D T G A D D T V L E D I D L P G R W K P K L I G G I G G F V K V R Q Y D H V P V E V C G H K V T T T  
V L V G P T P V D V I G R N L L T Q I G C T L N F  
>123049\_1 600.0  
PQITLWQRPIITIKIGGQLKDVLM D T G A D D T V L E D I D L P G R W K P K L I G G I G G F V K V R Q Y D N V P V E V C G H K V T T T  
V L V G P T P V D V I G R N L L T Q I G C T L N F  
>123049\_2 600.0  
PQITLWQRPIITIKIGGQLKDVLM D T G A D D T V L E D I D L P G R W K P K L I G G I G G F V K V Q Y D H V P V E V C G H K V T T T

VLVGPTPVDVIGRLLTQIGCTLNF  
>123049\_3 600.0  
PQITLWQRPIITIKIGGQLKDVLMMDTGADDTVLEDIDLPGRWKPKLIGGIGGFVKVKQYDNVPVEVCGHKVTTT  
VLVGPTPVDVIGRLLTQIGCTLNF  
>123049\_4 600.0  
PQITLWQRPIITIKIGGQLKDVLMMDTGADDTVLEDIDLPGKWKPKLIGGIGGFVKVRQYDHPVEVCGHKVTTT  
VLVGPTPVDVIGRLLTQIGCTLNF  
>123049\_5 600.0  
PQITLWQRPIITIKIGGQLKDVLMMDTGADDTVLEDIDLPGKWKPKLIGGIGGFVKVRQYDNVPVEVCGHKVTTT  
VLVGPTPVDVIGRLLTQIGCTLNF  
>123049\_6 600.0  
PQITLWQRPIITIKIGGQLKDVLMMDTGADDTVLEDIDLPGKWKPKLIGGIGGFVKVKQYDHPVEVCGHKVTTT  
VLVGPTPVDVIGRLLTQIGCTLNF  
>123049\_7 600.0  
PQITLWQRPIITIKIGGQLKDVLMMDTGADDTVLEDIDLPGKWKPKLIGGIGGFVKVKQYDNVPVEVCGHKVTTT  
VLVGPTPVDVIGRLLTQIGCTLNF  
>123049\_8 600.0  
PQITLWQRPIITIKIGGQLKDVLMMDTGADDTVLENIDLPGRWKPKLIGGIGGFVKVRQYDHPVEVCGHKVTTT  
VLVGPTPVDVIGRLLTQIGCTLNF  
>123049\_9 600.0  
PQITLWQRPIITIKIGGQLKDVLMMDTGADDTVLENIDLPGRWKPKLIGGIGGFVKVRQYDNVPVEVCGHKVTTT  
VLVGPTPVDVIGRLLTQIGCTLNF  
>123049\_10 600.0  
PQITLWQRPIITIKIGGQLKDVLMMDTGADDTVLENIDLPGRWKPKLIGGIGGFVKVKQYDHPVEVCGHKVTTT  
VLVGPTPVDVIGRLLTQIGCTLNF  
>123049\_11 600.0  
PQITLWQRPIITIKIGGQLKDVLMMDTGADDTVLENIDLPGRWKPKLIGGIGGFVKVKQYDNVPVEVCGHKVTTT  
VLVGPTPVDVIGRLLTQIGCTLNF  
>123049\_12 600.0  
PQITLWQRPIITIKIGGQLKDVLMMDTGADDTVLENIDLPGKWKPKLIGGIGGFVKVRQYDHPVEVCGHKVTTT  
VLVGPTPVDVIGRLLTQIGCTLNF  
>123049\_13 600.0  
PQITLWQRPIITIKIGGQLKDVLMMDTGADDTVLENIDLPGKWKPKLIGGIGGFVKVRQYDNVPVEVCGHKVTTT  
VLVGPTPVDVIGRLLTQIGCTLNF  
>123049\_14 600.0  
PQITLWQRPIITIKIGGQLKDVLMMDTGADDTVLENIDLPGKWKPKLIGGIGGFVKVKQYDHPVEVCGHKVTTT  
VLVGPTPVDVIGRLLTQIGCTLNF  
>123049\_15 600.0  
PQITLWQRPIITIKIGGQLKDVLMMDTGADDTVLENIDLPGKWKPKLIGGIGGFVKVKQYDNVPVEVCGHKVTTT  
VLVGPTPVDVIGRLLTQIGCTLNF  
>98601\_0 600.0  
PQITLWQRPFVITIKIGGQLIEALLDTGADDTVLEEMNLPGRWKPKIIGGIGGFVKVRQYDQPIEICGHKVITTVL  
IGPTPVNAIGRLLTQIGCTLNF  
>147975\_1 600.0  
PQITLWQRPIITVKGVGGHLEALLDTGADDTVLEGLDLPGRWKPKMIGGIGGFVKVRQYDQPIEICGHKVLSTV  
LVGPTPVNVIGRNLMTQIGCTLNF  
>143332\_24 600.0  
PQITLWQRPIVTVKIGGHLVEVLLDTGADDTVLEEINLPGRWKPKMIGGIGGFVKVKQYDQVPIEIWGHKVLST  
VLVGPTPVNVIGRNLMTQIGCTLNF  
>143332\_25 600.0  
PQITLWQRPIVTVKIGGHLVEVLLDTGADDTVLEEINLPGRWKPKMIGGIGGFVKVKQYDQVPIEIWGHKVLST  
VLVGPTPVNVVGRNLMTQIGCTLNF  
>143332\_81 600.0  
PQITLWQRPIVTVKVGGHLEVLLDTGADDTVIEEINLPGRWKPKMIGGIGGFVKVKQYDQVPIEIWGHKVLST  
VLVGPTPVNVVGRNLMTQIGCTLNF  
>143332\_82 600.0  
PQITLWQRPIVTVKVGGHLEVLLDTGADDTVIEEINLPGRWKPKMIGGIGGFVRVKQYDQVPIEIWGHKVLST  
VLVGPTPVNVIGRNLMTQIGCTLNF  
>143332\_83 600.0  
PQITLWQRPIVTVKVGGHLEVLLDTGADDTVIEEINLPGRWKPKMIGGIGGFVRVKQYDQVPIEIWGHKVLST  
VLVGPTPVNVVGRNLMTQIGCTLNF  
>143332\_84 600.0  
PQITLWQRPIVTVKVGGHLEVLLDTGADDTVIEEINLPGRWKPKIIGGIGGFVKVKQYDQVPIEIWGHKVLSTV

LVGPTPVNVIGRNLMTQIGCTLNF  
>143332\_85 600.0  
PQITLWQRPIVTVKVGHLVEVLLDTGADDTVIEEINLPGRWPKKIIGGIGGFVKVKQYDQVPIEIWGHKVLSTV  
LVGPTPVNVVGRNLMTQIGCTLNF  
>143332\_86 600.0  
PQITLWQRPIVTVKVGHLVEVLLDTGADDTVIEEINLPGRWPKKIIGGIGGFVVRVKQYDQVPIEIWGHKVLSTV  
LVGPTPVNVIGRNLMTQIGCTLNF  
>143332\_87 600.0  
PQITLWQRPIVTVKVGHLVEVLLDTGADDTVIEEINLPGRWPKKIIGGIGGFVVRVKQYDQVPIEIWGHKVLSTV  
LVGPTPVNVVGRNLMTQIGCTLNF  
>143332\_88 600.0  
PQITLWQRPIVTVKVGHLVEVLLDTGADDTVVEEINLPGRWPKMIGGIGGFVKVKQYDQVPIEIWGHKVLSTV  
TVLVGPTPVNVIGRNLMTQIGCTLNF  
>143332\_89 600.0  
PQITLWQRPIVTVKVGHLVEVLLDTGADDTVVEEINLPGRWPKMIGGIGGFVKVKQYDQVPIEIWGHKVLSTV  
TVLVGPTPVNVVGRNLMTQIGCTLNF  
>143332\_90 600.0  
PQITLWQRPIVTVKVGHLVEVLLDTGADDTVVEEINLPGRWPKMIGGIGGFVVRVKQYDQVPIEIWGHKVLSTV  
TVLVGPTPVNVIGRNLMTQIGCTLNF  
>143332\_91 600.0  
PQITLWQRPIVTVKVGHLVEVLLDTGADDTVVEEINLPGRWPKMIGGIGGFVVRVKQYDQVPIEIWGHKVLSTV  
TVLVGPTPVNVVGRNLMTQIGCTLNF  
>143332\_92 600.0  
PQITLWQRPIVTVKVGHLVEVLLDTGADDTVVEEINLPGRWPKKIIGGIGGFVKVKQYDQVPIEIWGHKVLSTV  
VLVGPPTPVNVIGRNLMTQIGCTLNF  
>143332\_93 600.0  
PQITLWQRPIVTVKVGHLVEVLLDTGADDTVVEEINLPGRWPKKIIGGIGGFVKVKQYDQVPIEIWGHKVLSTV  
VLVGPPTPVNVVGRNLMTQIGCTLNF  
>143332\_94 600.0  
PQITLWQRPIVTVKVGHLVEVLLDTGADDTVVEEINLPGRWPKKIIGGIGGFVVRVKQYDQVPIEIWGHKVLSTV  
VLVGPPTPVNVIGRNLMTQIGCTLNF  
>143332\_95 600.0  
PQITLWQRPIVTVKVGHLVEVLLDTGADDTVVEEINLPGRWPKKIIGGIGGFVVRVKQYDQVPIEIWGHKVLSTV  
VLVGPPTPVNVVGRNLMTQIGCTLNF  
>103057\_0 600.0  
PQITLWQRPIVTVKIGGQLREALLDTGADDTVFEIDELPGRWTPKIIGGIGGFVKVKQYEEVPIEICEHKTATV  
VGPTPFNIIGRNLMTQLGCTLNF  
>103057\_2 600.0  
PQITLWQRPIVTVKIGGQLREALLDTGADDTVFEIDELPGRWTPKIIGGIGGFVKVKQYEEVPIEICEHKTATV  
LVGPTPFNIIGRNLMTQLGCTLNF  
>56150\_0 600.0  
PQITLWRRPVVTIKVGGQLTEALLDTGADDTVFEIDINLPGRWTPKMIMIGGLVKVRQYDQVPIEFCGHKVLSTV  
TVLVGPTPANIIGRNLMTQIGCTLNF  
>56150\_1 600.0  
PQITLWRRPVVTIKVGGQLTEALLDTGADDTVFEIDINLPGRWTPKMIMIGGLVKVRQYDQVPIEFCGRKVLSTV  
TVLVGPTPANIIGRNLMTQIGCTLNF  
>56150\_2 600.0  
PQITLWRRPVVTIKVGGQLTEALLDTGADDTVFEIDINLPGRWTPKMIMIGGLVKVKQYDQVPIEFCGHKVLSTV  
TVLVGPTPANIIGRNLMTQIGCTLNF  
>56150\_3 600.0  
PQITLWRRPVVTIKVGGQLTEALLDTGADDTVFEIDINLPGRWTPKMIMIGGLVKVKQYDQVPIEFCGRKVLSTV  
TVLVGPTPANIIGRNLMTQIGCTLNF  
>143473\_16 600.0  
PQITLWQRPIVIVKIGGQLREALLDTGADDTVFEIDLPGRWTPKLIIGGIGGFVKVRQYDQVPIEICGHKIISTVL  
VGPTPANIIGRNLMTQLGCTLNF  
>143473\_18 600.0  
PQITLWQRPIVIVKIGGQLREALLDTGADDTVFEIDLPGRWTPKLIIGGIGGFVKVRQYDQVPIEICGHKIVISTV  
LVGPTPANIIGRNLMTQLGCTLNF  
>143473\_20 600.0  
PQITLWQRPIVIVKIGGQLREALLDTGADDTVFEIDLPGRWTPKLIIGGIGGFVVRQYDQVPIEICGHKIISTVL  
VGPTPANIIGRNLMTQLGCTLNF  
>143473\_22 600.0  
PQITLWQRPIVIVKIGGQLREALLDTGADDTVFEIDLPGRWTPKLIIGGIGGFVVRQYDQVPIEICGHKIVISTV



LVGPTPANIIGRNLMTQLGCTLNF  
>143473\_24 600.0  
PQITLWQRPIVIVKIGGGQIREALLDTGADDTVFEDIDLPRWTPKLIIGGIGGFVKVRQYDQVPIEICGHKIISTVL  
VGPTPANIIGRNLMTQLGCTLNF  
>143473\_26 600.0  
PQITLWQRPIVIVKIGGGQIREALLDTGADDTVFEDIDLPRWTPKLIIGGIGGFVKVRQYDQVPIEICGHKVISTVL  
VGPTPANIIGRNLMTQLGCTLNF  
>143473\_28 600.0  
PQITLWQRPIVIVKIGGGQIREALLDTGADDTVFEDIDLPRWTPKLIIGGIGGFVVRQYDQVPIEICGHKIISTVL  
VGPTPANIIGRNLMTQLGCTLNF  
>143473\_30 600.0  
PQITLWQRPIVIVKIGGGQIREALLDTGADDTVFEDIDLPRWTPKLIIGGIGGFVVRQYDQVPIEICGHKVISTVL  
VGPTPANIIGRNLMTQLGCTLNF  
>148053\_0 600.0  
PQITLWQRPIVTVKIEGQLREALLDTGADNTVFEDITLPGRWKPRMIGGIGGFVKVKEYDQITIDICGHKAVGT  
LVGPTPANIIGRDLLTQIGCTLNF  
>148053\_1 600.0  
PQITLWQRPIVTVKIEGQLREALLDTGADNTVFEDITLPGRWKPRMIGGIGGFVKVKEYDQVTIDICGHKAVGT  
VLVGPTPANIIGRDLLTQIGCTLNF  
>148053\_2 600.0  
PQITLWQRPVTVKIEGQLREALLDTGADNTVFEDITLPGRWKPRMIGGIGGFVKVKEYDQITIDICGHKAVGT  
VLVGPTPANIIGRDLLTQIGCTLNF  
>5279\_0 600.0  
PQITLWQRPLVTVKIGGGQLREALLDTGADNTVLEDISLPRWPKMIGGIGGFVKVKEYDQVPIEICGHKTIGTV  
LVGPTPVNIGRDLMTQIGCTLNF  
>41212\_0 600.0  
PQITLWQRPLVTVKIGGGQLKEALLDTGADNTVIEDINLPGRWKPKLIIGGIGGFVKVQYDQIPIEICGHKTIGTVL  
VGPTPVNIGRDLMTQIGCTLNF  
>41212\_1 600.0  
PQITLWQRPLVTVKIGGGQLKEALLDTGADNTVIEDINLPGRWNPKLIIGGIGGFVKVQYDQIPIEICGHKTIGTVL  
VGPTPVNIGRDLMTQIGCTLNF  
>41212\_2 600.0  
PQITLWQRPLVTVKIGGGQLKEALLDTGADNTVIEDINFPGRWKPKLIIGGIGGFVKVQYDQIPIEICGHKTIGTVL  
VGPTPVNIGRDLMTQIGCTLNF  
>41212\_3 600.0  
PQITLWQRPLVTVKIGGGQLKEALLDTGADNTVIEDINFPGRWNPKLIIGGIGGFVKVQYDQIPIEICGHKTIGTVL  
VGPTPVNIGRDLMTQIGCTLNF  
>41212\_8 600.0  
PQITLWQRPLVTVKIGGGQLKEALLDTGADNTVMEDINLPGRWKPKLIIGGIGGFVKVQYDQIPIEICGHKTIGTV  
LVGPTPVNIGRDLMTQIGCTLNF  
>41212\_9 600.0  
PQITLWQRPLVTVKIGGGQLKEALLDTGADNTVMEDINLPGRWNPKLIIGGIGGFVKVQYDQIPIEICGHKTIGTV  
LVGPTPVNIGRDLMTQIGCTLNF  
>41212\_10 600.0  
PQITLWQRPLVTVKIGGGQLKEALLDTGADNTVMEDINFPGRWKPKLIIGGIGGFVKVQYDQIPIEICGHKTIGTV  
LVGPTPVNIGRDLMTQIGCTLNF  
>41212\_11 600.0  
PQITLWQRPLVTVKIGGGQLKEALLDTGADNTVMEDINFPGRWNPKLIIGGIGGFVKVQYDQIPIEICGHKTIGT  
VLVGPTPVNIGRDLMTQIGCTLNF

**Sequences for the NFV-susceptible ensemble**

>81921\_0 0.4  
PQITLWQRPLVAIKIEGQLKEALLDTGADDTVLEEMNLPGRWKPKMIGGIGGFVKVRQYDQILIEICGHKAIGTV  
LVGPTPVNIGRNLLTQIGCTLNF  
>81921\_1 0.4  
PQITLWQRPLVAIKIEGQLKEALLDTGADDTVLEEMNLPGRWKPKMIGGIGGFVKVRQYDQILIEICGHKAIGTV  
LIGPTPVNIGRNLLTQIGCTLNF  
>81921\_2 0.4  
PQITLWQRPLVAIKVEGQLKEALLDTGADDTVLEEMNLPGRWKPKMIGGIGGFVKVRQYDQILIEICGHKAIGTV  
LVGPTPVNIGRNLLTQIGCTLNF  
>81921\_3 0.4  
PQITLWQRPLVAIKVEGQLKEALLDTGADDTVLEEMNLPGRWKPKMIGGIGGFVKVRQYDQILIEICGHKAIGTV  
LIGPTPVNIGRNLLTQIGCTLNF

>81921\_4 0.4  
PQITLWQRPLVAIRIEGQLKEALLDTGADDTVLEEMNLPGRWPKMIGGIGGFIVRQYDQILIEICGHKAIGTV  
LVGPTPVNIIGRNLLTQIGCTLNF

>81921\_5 0.4  
PQITLWQRPLVAIRIEGQLKEALLDTGADDTVLEEMNLPGRWPKMIGGIGGFIVRQYDQILIEICGHKAIGTV  
LIGPTPVNIIGRNLLTQIGCTLNF

>81921\_6 0.4  
PQITLWQRPLVAIRVEGQLKEALLDTGADDTVLEEMNLPGRWPKMIGGIGGFIVRQYDQILIEICGHKAIGTV  
LVGPTPVNIIGRNLLTQIGCTLNF

>81921\_7 0.4  
PQITLWQRPLVAIRVEGQLKEALLDTGADDTVLEEMNLPGRWPKMIGGIGGFIVRQYDQILIEICGHKAIGTV  
LIGPTPVNIIGRNLLTQIGCTLNF

>81921\_8 0.4  
PQITLWQRPLVPIKIEGQLKEALLDTGADDTVLEEMNLPGRWPKMIGGIGGFIVRQYDQILIEICGHKAIGTV  
LVGPTPVNIIGRNLLTQIGCTLNF

>81921\_9 0.4  
PQITLWQRPLVPIKIEGQLKEALLDTGADDTVLEEMNLPGRWPKMIGGIGGFIVRQYDQILIEICGHKAIGTV  
LIGPTPVNIIGRNLLTQIGCTLNF

>81921\_10 0.4  
PQITLWQRPLVPIKVEGQLKEALLDTGADDTVLEEMNLPGRWPKMIGGIGGFIVRQYDQILIEICGHKAIGTV  
LVGPTPVNIIGRNLLTQIGCTLNF

>81921\_11 0.4  
PQITLWQRPLVPIKVEGQLKEALLDTGADDTVLEEMNLPGRWPKMIGGIGGFIVRQYDQILIEICGHKAIGTV  
LIGPTPVNIIGRNLLTQIGCTLNF

>81921\_12 0.4  
PQITLWQRPLVPIRIEGQLKEALLDTGADDTVLEEMNLPGRWPKMIGGIGGFIVRQYDQILIEICGHKAIGTV  
LVGPTPVNIIGRNLLTQIGCTLNF

>81921\_13 0.4  
PQITLWQRPLVPIRIEGQLKEALLDTGADDTVLEEMNLPGRWPKMIGGIGGFIVRQYDQILIEICGHKAIGTV  
LIGPTPVNIIGRNLLTQIGCTLNF

>81921\_14 0.4  
PQITLWQRPLVPIRVEGQLKEALLDTGADDTVLEEMNLPGRWPKMIGGIGGFIVRQYDQILIEICGHKAIGTV  
VLVGPPTPVNIIGRNLLTQIGCTLNF

>81921\_15 0.4  
PQITLWQRPLVPIRVEGQLKEALLDTGADDTVLEEMNLPGRWPKMIGGIGGFIVRQYDQILIEICGHKAIGTV  
VLIGPTPVNIIGRNLLTQIGCTLNF

>206433\_10 0.5  
PQITLWQRPLVTAKIGGQLKEALLDTGADDTVLEEMSLPGRWPKMIGGIGGFIVRQYDQILIEICGHKAIGTV  
LVGPTPVNIIGRNLLTQIGCTLNF

>61111\_0 0.4  
PQITLWQRPLVTIKIGGQTKEALLDTGADDTVLEEMNLPGRWPKMIGGIGGFIVRQYDQIPIEICGHKATGT  
VLVGPPTPVNIIGRNLLTQIGCTLNF

>61111\_1 0.4  
PQITLWQRPLVTIKIGGQTKEALLDTGADDTVLEEMNLPGRWPKMIGGIGGFIVRQYDQIPIEICGHKATGT  
VLVGPPTPVNIIGRNLLTQIGCTLNF

>44058\_2 0.2  
PQITLWQRPLVAIKIGGQLKEALLDTGADDTVLEEMNLPGRWPKMIGGIGGFIVRQYDQITIEICGHKAIGTV  
LVGPTPVNIIGRNLLTQIGCTLNF

>44058\_3 0.2  
PQITLWQRPLVAIRIGGQLKEALLDTGADDTVLEEMNLPGRWPKMIGGIGGFIVRQYDQITIEICGHKAIGTV  
LVGPTPVNIIGRNLLTQIGCTLNF

>45063\_0 0.5  
PQITLWQRPLVTIKIEGQLKEALLDTGADDTVLEDMNLPGRWPKMIGGIGGFIVRQYDQVSIIEICGHRAIGT  
VLVGPPTPVNIIGRNLLTQIGCTLNF

>216605\_0 0.5  
PQITLWQRPLVSIKIGGQIKEALLDTGADDTVLEEMSLPGRWPKMIGGIGGFIVRQYDQIAIEICGHKAIGTV  
LIGPTPVNIIGRNLLTQIGCTLNF

>109458\_0 0.4  
PQITLWQRPLVTIKIGGQLKEALLDTGADDTVLEEDIDLPGRWPKMIGGIGGFIVRQYDQILVEICGYKAIGTVL  
VGPTPVNIIGRNLLTQIGCTLNF

>109458\_1 0.4  
PQITLWQRPLVTIKIGGQLKEALLDTGADDTVLEEDIDLPGRWPKMIGGIGGFIVRQYDQILVEICGYKAIGTVL  
VGPTPVNIIGRNLLTQIGCTLNF

>148081\_0 0.4  
PQITLWQRPLVTIKIGGQTKEALLDTGADDTVLEEMNLP GKWKPKMIGGIGGFIKVRQYDQILIEICGHKAIGTV  
LVGPTPVNIIGRNLLTQIGCTLNF

>148081\_1 0.4  
PQITLWQRPLVTIKIGGQTKEALLDTGADDTVLEEMNLP GKWKPKMIGGIGGFIKVRQYDQILVEICGHKAIGTV  
LVGPTPVNIIGRNLLTQIGCTLNF

>148081\_2 0.4  
PQITLWQRPLVTIKVGGQTKEALLDTGADDTVLEEMNLP GKWKPKMIGGIGGFIKVRQYDQILIEICGHKAIGT  
VLVGPTPVNIIGRNLLTQIGCTLNF

>148081\_3 0.4  
PQITLWQRPLVTIKVGGQTKEALLDTGADDTVLEEMNLP GKWKPKMIGGIGGFIKVRQYDQILVEICGHKAIGT  
VLVGPTPVNIIGRNLLTQIGCTLNF

>148081\_4 0.4  
PQITLWQRPLVTIRIGGQTKEALLDTGADDTVLEEMNLP GKWKPKMIGGIGGFIKVRQYDQILIEICGHKAIGTV  
LVGPTPVNIIGRNLLTQIGCTLNF

>148081\_5 0.4  
PQITLWQRPLVTIRIGGQTKEALLDTGADDTVLEEMNLP GKWKPKMIGGIGGFIKVRQYDQILVEICGHKAIGT  
VLVGPTPVNIIGRNLLTQIGCTLNF

>148081\_6 0.4  
PQITLWQRPLVTIRVGGQTKEALLDTGADDTVLEEMNLP GKWKPKMIGGIGGFIKVRQYDQILIEICGHKAIGT  
VLVGPTPVNIIGRNLLTQIGCTLNF

>148081\_7 0.4  
PQITLWQRPLVTIRVGGQTKEALLDTGADDTVLEEMNLP GKWKPKMIGGIGGFIKVRQYDQILVEICGHKAIGT  
VLVGPTPVNIIGRNLLTQIGCTLNF

>75054\_1 0.4  
PQITLWQRPLVTIKIGGQLKEALLDTGADDTVLEEMNLP GRWKPKMIGGIGGFIKVRQYDQITIEICGHKATGTV  
LVGPTPVNIIGRNLLTQIGCTLNF

>75054\_3 0.4  
PQITLWQRPLVTIKIGGQLKEALLDTGADDTVLEEMNLP GRWKPKMIGGIGGFIKVRQYDQITIDICGHKATGT  
VLVGPTPVNIIGRNLLTQIGCTLNF

>75054\_5 0.4  
PQITLWQRPLVTIKIGGQLKEALLDTGADDTVLEEINLP GRWKPKMIGGIGGFIKVRQYDQITIEICGHKATGTVL  
VGPTPVNIIGRNLLTQIGCTLNF

>75054\_7 0.4  
PQITLWQRPLVTIKIGGQLKEALLDTGADDTVLEEINLP GRWKPKMIGGIGGFIKVRQYDQITIDICGHKATGTVL  
VGPTPVNIIGRNLLTQIGCTLNF

>75054\_9 0.4  
PQITLWQRPIVTIKIGGQLKEALLDTGADDTVLEEMNLP GRWKPKMIGGIGGFIKVRQYDQITIEICGHKATGTV  
LVGPTPVNIIGRNLLTQIGCTLNF

>75054\_11 0.4  
PQITLWQRPIVTIKIGGQLKEALLDTGADDTVLEEMNLP GRWKPKMIGGIGGFIKVRQYDQITIDICGHKATGTV  
LVGPTPVNIIGRNLLTQIGCTLNF

>75054\_13 0.4  
PQITLWQRPIVTIKIGGQLKEALLDTGADDTVLEEINLP GRWKPKMIGGIGGFIKVRQYDQITIEICGHKATGTVL  
VGPTPVNIIGRNLLTQIGCTLNF

>75054\_15 0.4  
PQITLWQRPIVTIKIGGQLKEALLDTGADDTVLEEINLP GRWKPKMIGGIGGFIKVRQYDQITIDICGHKATGTVL  
VGPTPVNIIGRNLLTQIGCTLNF

>13260\_0 0.4  
PQITLWQRPLVTIKIGGQLTEALLDTGADDTVLEEMNLP GRWKPKMIGGIGGFIKVGQYDQILIEICGHKAIGTV  
LVGPTPVNIIGRNLLTQIGCTLNF

>206433\_2 0.5  
PQITLWQRPLVTIKIGGQLKEALLDTGADDTVLEEMSLP GRWKPKMIGGIGGFIKVGQYDQILIEICGHKAIGTV  
LVGPTPVNIIGRNLLTQIGCTLNF

>206433\_3 0.5  
PQITLWQRPLVTIKIGGQLKEALLDTGADDTVLEEMSLP GRWKPKMIGGIGGFIKVGQYDQILIEICGHKAVGTV  
LVGPTPVNIIGRNLLTQIGCTLNF

>206433\_6 0.5  
PQITLWQRPLVTIKVGGQLKEALLDTGADDTVLEEMSLP GRWKPKMIGGIGGFIKVGQYDQILIEICGHKAIGT  
VLVGPTPVNIIGRNLLTQIGCTLNF

>206433\_7 0.5  
PQITLWQRPLVTIKVGGQLKEALLDTGADDTVLEEMSLP GRWKPKMIGGIGGFIKVGQYDQILIEICGHKAVGT  
VLVGPTPVNIIGRNLLTQIGCTLNF

>148029\_0 0.4  
PQITLWQRPLVTVKIGGQVKEALLDTGADDTVLEEMNLP GKWKPKMIGGIGGFIKVRQYDNILVDICGHKAEG  
TVLVGPTPVNIIGRNLLTQIGCTLNF

>148029\_1 0.4  
PQITLWQRPLVTVKIGGQVKEALLDTGADDTVLEEINLP GKWKPKMIGGIGGFIKVRQYDNILVDICGHKAEGT  
VLVGPTPVNIIGRNLLTQIGCTLNF

>81788\_0 0.5  
PQITLWQRPLVTIKIGGQLKEALLDTGADDTVLEEMELPGRWPKMIGGIGGFVKVRQYEQILVEICGHKAIGT  
VLVGPTPANIIGRNLLTQIGCTLNF

>102774\_3 0.4  
PQITLWQRPLVTIKIGGQLKEALLDTGADDTVLEEMNLSGRWPKMIGGLGGFIKVRQYDQIPIEICGHKAIGT  
VLIGPTPVNIIGRNLLTQLGCTLNF

>102774\_6 0.4  
PQITLWQRPLVTIKIGGQLKEALLDTGADDTVLEEMNLSGRWPKMIGGIGGFIKVRQYDQIPIEICGHKAIGTV  
LIGPTPVNIIGRNLLTQLGCTLNF

>102774\_7 0.4  
PQITLWQRPLVTIKIGGQLKEALLDTGADDTVLEEMNLSGRWPKMIGGLGGFIKVRQYDQIPIEICGHKAIGT  
VLIGPTPVNIIGRNLLTQLGCTLNF

>102774\_11 0.4  
PQITLWQRPIVTIKIGGQLKEALLDTGADDTVLEEMNLSGRWPKMIGGLGGFIKVRQYDQIPIEICGHKAIGTV  
LIGPTPVNIIGRNLLTQLGCTLNF

>102774\_14 0.4  
PQITLWQRPIVTIKIGGQLKEALLDTGADDTVLEEMNLSGRWPKMIGGIGGFIKVRQYDQIPIEICGHKAIGTV  
LIGPTPVNIIGRNLLTQLGCTLNF

>102774\_15 0.4  
PQITLWQRPIVTIKIGGQLKEALLDTGADDTVLEEMNLSGRWPKMIGGLGGFIKVRQYDQIPIEICGHKAIGTV  
LIGPTPVNIIGRNLLTQLGCTLNF

>257929\_0 0.3  
PQITLWQRPLVTVKVGQQLKEALLDTGADDTVLEEMNLQGRWPKMIGGIGGFIKVKQYDQIPVEICGHKAIG  
TVLVGPTPVNIIGRNLLTQIGCTLNF

>206451\_0 0.4  
PQMTLWQRPLVTIRIGGQLKEALLDTGADDTVLEEMNLP GKWKPKMIGGIGGFIKVGQYDQIPIEICGHKAIGT  
VLIGPTPVNIIGRNLLTQIGCTLNF

>45116\_0 0.3  
PQITLWQRPLVTIKIGGQLKEALLDTGADDTVLEEMNLPGRWPKMIGGLGGFIKVRQYDQILIEICGHKVIGTV  
LVGPTPVNIIGRNLLTQIGCTLNF

>75046\_0 0.5  
PQITLWQRPLVTIKIGGQLKEALLDTGADDTVLEEMNLPGRWPKMIGGIGGFIKVRQYDQIAIEICGHKAIGTV  
LVGPTPVNIIGRNLLTQIGCTLNF

>13251\_0 0.4  
PQITLWQRPLVTIRVGGQLKEALLDTGADDTVLEEMSLPGKWKPKMIGGIGGFIKVRQYDQVQIEICGHKAIGT  
VLVGPTPVNIIGRNLLTQIGCTLNF

>13251\_1 0.4  
PQITLWQRPLVTIRVGGQLKEALLDTGADDTVLEEMSLPGKWKPKMIGGIGGFIKVRQYDQVQIEICGHKAIGT  
VLVGPTPVNIIGRSLLTQIGCTLNF

>13251\_2 0.4  
PQITLWQRPLVTIRVGGQLKEALLDTGADDTVLEEMSLPGKWKPKMIGGIGGFIKVRQYDQVQIEICGHKAIGT  
VLIGPTPVNIIGRNLLTQIGCTLNF

>13251\_3 0.4  
PQITLWQRPLVTIRVGGQLKEALLDTGADDTVLEEMSLPGKWKPKMIGGIGGFIKVRQYDQVQIEICGHKAIGT  
VLIGPTPVNIIGRSLLTQIGCTLNF

>13251\_4 0.4  
PQITLWQRPLVTIRVGGQLKEALLDTGADDTVLEEISLPGKWKPKMIGGIGGFIKVRQYDQVQIEICGHKAIGT  
VLVGPTPVNIIGRNLLTQIGCTLNF

>13251\_5 0.4  
PQITLWQRPLVTIRVGGQLKEALLDTGADDTVLEEISLPGKWKPKMIGGIGGFIKVRQYDQVQIEICGHKAIGT  
VLVGPTPVNIIGRSLLTQIGCTLNF

>13251\_6 0.4  
PQITLWQRPLVTIRVGGQLKEALLDTGADDTVLEEISLPGKWKPKMIGGIGGFIKVRQYDQVQIEICGHKAIGT  
VLIGPTPVNIIGRNLLTQIGCTLNF

>13251\_7 0.4  
PQITLWQRPLVTIRVGGQLKEALLDTGADDTVLEEISLPGKWKPKMIGGIGGFIKVRQYDQVQIEICGHKAIGT  
VLIGPTPVNIIGRSLLTQIGCTLNF

>44058\_0 0.2  
PQITLWQRPLVTIKIGGQLKEALLDTGADDTVLEEMNLPGWKPKMIGGIGGFIVRQYDQITIEICGHKAIGTV  
LVGPTPVNIIGRNLLTQIGCTLNF

>44058\_1 0.2  
PQITLWQRPLVTIRIGGQLKEALLDTGADDTVLEEMNLPGWKPKMIGGIGGFIVRQYDQITIEICGHKAIGTV  
LVGPTPVNIIGRNLLTQIGCTLNF

>60639\_0 0.4  
PQITLWQRPLVNIKIGGQLKEALLDTGADDTVLEDMSLPGRWPKMIGGIGGFIVRQYDQIQVEICGHKAIGT  
VLVGPTPVNIIGRNLLTQIGCTLNF

>75054\_0 0.4  
PQITLWQRPLVTIKIGGQLKEALLDTGADDTVLEEMNLPGRWPKMIGGIGGFIVRQYDQITIEICGHKAIGTV  
LVGPTPVNIIGRNLLTQIGCTLNF

>75054\_2 0.4  
PQITLWQRPLVTIKIGGQLKEALLDTGADDTVLEEMNLPGRWPKMIGGIGGFIVRQYDQITIDICGHKAIGTV  
LVGPTPVNIIGRNLLTQIGCTLNF

>75054\_4 0.4  
PQITLWQRPLVTIKIGGQLKEALLDTGADDTVLEEINLPGRWPKMIGGIGGFIVRQYDQITIEICGHKAIGTVL  
VGPTPVNIIGRNLLTQIGCTLNF

>75054\_6 0.4  
PQITLWQRPLVTIKIGGQLKEALLDTGADDTVLEEINLPGRWPKMIGGIGGFIVRQYDQITIDICGHKAIGTVL  
VGPTPVNIIGRNLLTQIGCTLNF

>75054\_8 0.4  
PQITLWQRPIVTIKIGGQLKEALLDTGADDTVLEEMNLPGRWPKMIGGIGGFIVRQYDQITIEICGHKAIGTV  
LVGPTPVNIIGRNLLTQIGCTLNF

>75054\_10 0.4  
PQITLWQRPIVTIKIGGQLKEALLDTGADDTVLEEMNLPGRWPKMIGGIGGFIVRQYDQITIDICGHKAIGTV  
LVGPTPVNIIGRNLLTQIGCTLNF

>75054\_12 0.4  
PQITLWQRPIVTIKIGGQLKEALLDTGADDTVLEEINLPGRWPKMIGGIGGFIVRQYDQITIEICGHKAIGTVL  
VGPTPVNIIGRNLLTQIGCTLNF

>75054\_14 0.4  
PQITLWQRPIVTIKIGGQLKEALLDTGADDTVLEEINLPGRWPKMIGGIGGFIVRQYDQITIDICGHKAIGTVL  
VGPTPVNIIGRNLLTQIGCTLNF

>75114\_0 0.4  
PQITLWQRPLVTIKIGGQLKEALLDTGADDTVLEDMDLPGRWKPKMIGGIGGFIVRQYDQISIEICGHKAIGTV  
LVGPTPINIIGRNLLTQIGCTLNF

>148059\_0 0.5  
PQITLWQRPLVTIKIGGQLKEALLDTGADDTVLEEMNLPGRWPKMIGGIGGFIVKQYDQIQIEICGHKAIGTV  
LVGPTPVNIIGRNLLTQIGCTLNF

>148111\_0 0.5  
PQITLWQRPLVTIKIGGQLKEALLDTGADDTVLEEMNLPGRWPKPMIGGIGGFIVRQYDQISMEICGHKAIG  
TVLIGPTPVNIIGRNLLTQIGCTLNF

>148111\_1 0.5  
PQITLWQRPLVTIKIGGQLKEALLDTGADDTVLEEMNLPGRWPKPMIGGIGGFIVRQYDQVSMEICGHKAIG  
TVLIGPTPVNIIGRNLLTQIGCTLNF

>9706\_0 0.4  
PQITLWQRPLVTIKIGGQLKEALLDTGADDTVLEDMDLPGRWKPKMIGGIGGFIVRQYDQILIEICGHKAIGTV  
LVGPTPVNIIGRNLLTQIGCTLNF

>28226\_0 0.4  
PQITLWQRPLVTIKIGGQLKEALLDTGADDTVLEEMNLPGRWPKMIGGIGGFIVRQYDQILVEICGHKAIGTV  
LVGPTPVNIIGRNLLTQMGCTLNF

>28226\_1 0.4  
PQITLWQRPLVTIKIGGQLKEALLDTGADDTVLEEMNLPGRWPKMIGGIGGFIVRQYDQILVEICGHKAIGTV  
LVGPTPVNIIGRNLWTQMGCTLNF

>28226\_2 0.4  
PQITLWQRPLVTIKIGGQLKEALLDTGADDTVLEEMNLPGWKPKMIGGIGGFIVRQYDQILVEICGHKAIGTV  
LVGPTPVNIIGRNLLTQMGCTLNF

>28226\_3 0.4  
PQITLWQRPLVTIKIGGQLKEALLDTGADDTVLEEMNLPGWKPKMIGGIGGFIVRQYDQILVEICGHKAIGTV  
LVGPTPVNIIGRNLWTQMGCTLNF

>28226\_4 0.4  
PQITLWQRPLVTIKIGGQLKEALLDTGADDTVLEEMDLPGRWKPKMIGGIGGFIVRQYDQILVEICGHKAIGTV  
LVGPTPVNIIGRNLLTQMGCTLNF

>28226\_5 0.4  
PQITLWQRPLVTIKIGGQLKEALLDTGADDTVLEEMDLPGRWKPKMIGGIGGFIKVRQYDQILVEICGHKAIGTV  
LVGPTPVNIIGRNLLTQMGCTLNF  
>28226\_6 0.4  
PQITLWQRPLVTIKIGGQLKEALLDTGADDTVLEEMDLPGKWKPKMIGGIGGFIKVRQYDQILVEICGHKAIGTV  
LVGPTPVNIIGRNLLTQMGCTLNF  
>28226\_7 0.4  
PQITLWQRPLVTIKIGGQLKEALLDTGADDTVLEEMDLPGKWKPKMIGGIGGFIKVRQYDQILVEICGHKAIGTV  
LVGPTPVNIIGRNLLTQMGCTLNF  
>44074\_0 0.4  
PQITLWQRPLVTVKIGGQLKEALLDTGADDTVLEEMDLPGRWKPKMIGGIGGFIKVRQYDQILIEICGHRAIGT  
VLVGPTPVNIIGRNLLTQIGCTLNF  
>44074\_1 0.4  
PQITLWQRPLVTVRIGGQLKEALLDTGADDTVLEEMDLPGRWKPKMIGGIGGFIKVRQYDQILIEICGHRAIGT  
VLVGPTPVNIIGRNLLTQIGCTLNF  
>45114\_0 0.2  
PQITLWQRPLVTIKIGGQLKEALLDTGADDTVLEEMNLPGRWKPKMIGGLGGFIKVRQYDQILIEICGHKAIGTV  
LVGPTPVNIIGRNLLTQIGCTLNF  
>54452\_0 0.4  
PQITLWQRPLVTIKIGGQLTEALLDTGADDTVLEEMNLPGRWKPKMIGGIGGFIKVRQYDQILIEICGHKAIGTV  
LVGPTPVNIIGRNLLTQIGCTLNF  
>75126\_0 0.5  
PQITLWQRPLVTVRIGGQLKEALLDTGADDTVLEEMNLPKWKPKMIGGIGGFIKVRQYDQILVEICGHKAIGT  
VLVGPTPVNIIGRNLLTQIGCTLNF  
>102796\_0 0.2  
PQITLWQRPLVTIKIGGQLKEALLDTGADDTVLEEDLPGKWKPKMIGGLGGFIKVRQYDQILVEICGHKAIGTV  
LVGPTPVNIIGRNLLTQIGCTLNF  
>102796\_1 0.2  
PQITLWQRPLVTIKIGGQLKEALLDTGADDTVLEEDLPGKWKPKMIGGLGGFIKVRQYDQILVEICGHKAIGTV  
LVGPTPVNIIGRNLLTQIGCTLNF  
>109438\_0 0.5  
PQITLWQRPLVTIKVGGQLKEALLDTGADDTVLEEMSLPGKWKPKMIGGIGGFIKVRQYDQILIEICGHKAIGTV  
LVGPTPVNIIGRNLLTQIGCTLNF  
>109438\_1 0.5  
PQITLWQRPLVTIKVGGQLKEALLDTGADDTVLEEMSLPGKWKPKMIGGIGGFIKVRQYDQILVEICGHKAIGT  
VLVGPTPVNIIGRNLLTQIGCTLNF

**Sequences for the SQV-resistant ensemble**

>117051\_0 1000.0  
PQITLWQRPFIPVKIGGQLIEALMDTGADDTVLEDINLPGRWKPKIIGGIGGFIKVRQYDQVEIEICGHKITSPLV  
VGATPVNAIGRNVMTKLGCTLNF  
>98601\_0 1000.0  
PQITLWQRPFVTIKIGGQLIEALLDTGADDTVLEEMNLPGRWKPKIIGGIGGFVKVRQYDQIPIEICGHKVITTVL  
IGPTPVNAIGRNLLTQIGCTLNF  
>98604\_0 1000.0  
PQITLWQRPFVTIKIGGQLIEALLDTGADDTVLEEMNLPGRWKPKIIGGIGGFVKVRQYDQIPIEICGHKVISTVL  
VGPTPVNAIGRNLLTQIGCTLNF  
>98604\_1 1000.0  
PQITLWQRPFVTIKIGGQLIEALLDTGADDTVLEEINLPGRWKPKIIGGIGGFVKVRQYDQIPIEICGHKVISTVLV  
GPTPVNAIGRNLLTQIGCTLNF  
>123049\_0 1000.0  
PQITLWQRPIITIKIGGQLKDVLMMDTGADDTVLEDIDLPGRWKPKLIGGIGGFVKVRQYDHPVVEVCGHKVTTT  
VLVGPTPVDVIGRNLLTQIGCTLNF  
>123049\_1 1000.0  
PQITLWQRPIITIKIGGQLKDVLMMDTGADDTVLEDIDLPGRWKPKLIGGIGGFVKVRQYDNPVVEVCGHKVTTT  
VLVGPTPVDVIGRNLLTQIGCTLNF  
>123049\_2 1000.0  
PQITLWQRPIITIKIGGQLKDVLMMDTGADDTVLEDIDLPGRWKPKLIGGIGGFVKVQYDHPVVEVCGHKVTTT  
VLVGPTPVDVIGRNLLTQIGCTLNF  
>123049\_3 1000.0  
PQITLWQRPIITIKIGGQLKDVLMMDTGADDTVLEDIDLPGRWKPKLIGGIGGFVKVQYDNPVVEVCGHKVTTT  
VLVGPTPVDVIGRNLLTQIGCTLNF  
>123049\_4 1000.0

PQITLWQRPIITIKIGGQLKDVLMMDTGADDTVLEDIDLPGKWKPKLIGGIGGFVKVRQYDHPVEVCGHKVTTT  
VLVGPTPVDVIGRNLLTQIGCTLNF  
>123049\_5 1000.0  
PQITLWQRPIITIKIGGQLKDVLMMDTGADDTVLEDIDLPGKWKPKLIGGIGGFVKVRQYDNPVEVCGHKVTTT  
VLVGPTPVDVIGRNLLTQIGCTLNF  
>123049\_6 1000.0  
PQITLWQRPIITIKIGGQLKDVLMMDTGADDTVLEDIDLPGKWKPKLIGGIGGFVKVKQYDHPVEVCGHKVTTT  
VLVGPTPVDVIGRNLLTQIGCTLNF  
>123049\_7 1000.0  
PQITLWQRPIITIKIGGQLKDVLMMDTGADDTVLEDIDLPGKWKPKLIGGIGGFVKVKQYDNPVEVCGHKVTTT  
VLVGPTPVDVIGRNLLTQIGCTLNF  
>123049\_8 1000.0  
PQITLWQRPIITIKIGGQLKDVLMMDTGADDTVLENIDLPGRWKPKLIGGIGGFVKVRQYDHPVEVCGHKVTTT  
VLVGPTPVDVIGRNLLTQIGCTLNF  
>123049\_9 1000.0  
PQITLWQRPIITIKIGGQLKDVLMMDTGADDTVLENIDLPGRWKPKLIGGIGGFVKVRQYDNPVEVCGHKVTTT  
VLVGPTPVDVIGRNLLTQIGCTLNF  
>123049\_10 1000.0  
PQITLWQRPIITIKIGGQLKDVLMMDTGADDTVLENIDLPGRWKPKLIGGIGGFVKVKQYDHPVEVCGHKVTTT  
VLVGPTPVDVIGRNLLTQIGCTLNF  
>123049\_11 1000.0  
PQITLWQRPIITIKIGGQLKDVLMMDTGADDTVLENIDLPGRWKPKLIGGIGGFVKVKQYDNPVEVCGHKVTTT  
VLVGPTPVDVIGRNLLTQIGCTLNF  
>123049\_12 1000.0  
PQITLWQRPIITIKIGGQLKDVLMMDTGADDTVLENIDLPGKWKPKLIGGIGGFVKVRQYDHPVEVCGHKVTTT  
VLVGPTPVDVIGRNLLTQIGCTLNF  
>123049\_13 1000.0  
PQITLWQRPIITIKIGGQLKDVLMMDTGADDTVLENIDLPGKWKPKLIGGIGGFVKVRQYDNPVEVCGHKVTTT  
VLVGPTPVDVIGRNLLTQIGCTLNF  
>123049\_14 1000.0  
PQITLWQRPIITIKIGGQLKDVLMMDTGADDTVLENIDLPGKWKPKLIGGIGGFVKVKQYDHPVEVCGHKVTTT  
VLVGPTPVDVIGRNLLTQIGCTLNF  
>123049\_15 1000.0  
PQITLWQRPIITIKIGGQLKDVLMMDTGADDTVLENIDLPGKWKPKLIGGIGGFVKVKQYDNPVEVCGHKVTTT  
VLVGPTPVDVIGRNLLTQIGCTLNF  
>147975\_1 1000.0  
PQITLWQRPIITIKIGGQLKDVLMMDTGADDTVLEIDLPGRWKPKMIGGIGGFVKVRQYDQPIEICGHKVLSTV  
LVGPTPVNVIGRNLMTQIGCTLNF  
>143332\_24 1000.0  
PQITLWQRPIIVTVKIGGHLVEVLLDTGADDTVLEEINLPGRWKPKMIGGIGGFVKVKQYDQVPIEIWGHKVLST  
VLVGPTPVNVIGRNLMTQIGCTLNF  
>143332\_25 1000.0  
PQITLWQRPIIVTVKIGGHLVEVLLDTGADDTVLEEINLPGRWKPKMIGGIGGFVKVKQYDQVPIEIWGHKVLST  
VLVGPTPVNVVGRNLMTQIGCTLNF  
>143332\_26 1000.0  
PQITLWQRPIIVTVKIGGHLVEVLLDTGADDTVLEEINLPGRWKPKMIGGIGGFVVRVKQYDQVPIEIWGHKVLST  
VLVGPTPVNVIGRNLMTQIGCTLNF  
>143332\_27 1000.0  
PQITLWQRPIIVTVKIGGHLVEVLLDTGADDTVLEEINLPGRWKPKMIGGIGGFVVRVKQYDQVPIEIWGHKVLST  
VLVGPTPVNVVGRNLMTQIGCTLNF  
>143332\_28 1000.0  
PQITLWQRPIIVTVKIGGHLVEVLLDTGADDTVLEEINLPGRWKPKIIGGIGGFVKVKQYDQVPIEIWGHKVLSTV  
LVGPTPVNVIGRNLMTQIGCTLNF  
>143332\_29 1000.0  
PQITLWQRPIIVTVKIGGHLVEVLLDTGADDTVLEEINLPGRWKPKIIGGIGGFVKVKQYDQVPIEIWGHKVLSTV  
LVGPTPVNVVGRNLMTQIGCTLNF  
>143332\_30 1000.0  
PQITLWQRPIIVTVKIGGHLVEVLLDTGADDTVLEEINLPGRWKPKIIGGIGGFVVRVKQYDQVPIEIWGHKVLSTV  
LVGPTPVNVIGRNLMTQIGCTLNF  
>143332\_31 1000.0  
PQITLWQRPIIVTVKIGGHLVEVLLDTGADDTVLEEINLPGRWKPKIIGGIGGFVVRVKQYDQVPIEIWGHKVLSTV  
LVGPTPVNVVGRNLMTQIGCTLNF  
>143332\_32 1000.0

PQITLWQRPIVTVKIGGHLVEVLLDTGADDTVIEEINLPGRWPKMIGGIGGFVKVKQYDQVPIEWGHKVLST  
VLVGPTPVNVVGRNLMTQIGCTLNF  
>143332\_33 1000.0  
PQITLWQRPIVTVKIGGHLVEVLLDTGADDTVIEEINLPGRWPKMIGGIGGFVKVKQYDQVPIEWGHKVLST  
VLVGPTPVNVVGRNLMTQIGCTLNF  
>143332\_34 1000.0  
PQITLWQRPIVTVKIGGHLVEVLLDTGADDTVIEEINLPGRWPKMIGGIGGFVRVKQYDQVPIEWGHKVLST  
VLVGPTPVNVVGRNLMTQIGCTLNF  
>143332\_35 1000.0  
PQITLWQRPIVTVKIGGHLVEVLLDTGADDTVIEEINLPGRWPKMIGGIGGFVRVKQYDQVPIEWGHKVLST  
VLVGPTPVNVVGRNLMTQIGCTLNF  
>143332\_36 1000.0  
PQITLWQRPIVTVKIGGHLVEVLLDTGADDTVIEEINLPGRWPKMIGGIGGFVKVKQYDQVPIEWGHKVLSTV  
LVGPTPVNVVGRNLMTQIGCTLNF  
>143332\_37 1000.0  
PQITLWQRPIVTVKIGGHLVEVLLDTGADDTVIEEINLPGRWPKMIGGIGGFVKVKQYDQVPIEWGHKVLSTV  
LVGPTPVNVVGRNLMTQIGCTLNF  
>143332\_38 1000.0  
PQITLWQRPIVTVKIGGHLVEVLLDTGADDTVIEEINLPGRWPKMIGGIGGFVRVKQYDQVPIEWGHKVLSTV  
LVGPTPVNVVGRNLMTQIGCTLNF  
>143332\_39 1000.0  
PQITLWQRPIVTVKIGGHLVEVLLDTGADDTVIEEINLPGRWPKMIGGIGGFVRVKQYDQVPIEWGHKVLSTV  
LVGPTPVNVVGRNLMTQIGCTLNF  
>143332\_40 1000.0  
PQITLWQRPIVTVKIGGHLVEVLLDTGADDTVVEEINLPGRWPKMIGGIGGFVKVKQYDQVPIEWGHKVLST  
VLVGPTPVNVVGRNLMTQIGCTLNF  
>143332\_41 1000.0  
PQITLWQRPIVTVKIGGHLVEVLLDTGADDTVVEEINLPGRWPKMIGGIGGFVKVKQYDQVPIEWGHKVLST  
VLVGPTPVNVVGRNLMTQIGCTLNF  
>143332\_42 1000.0  
PQITLWQRPIVTVKIGGHLVEVLLDTGADDTVVEEINLPGRWPKMIGGIGGFVRVKQYDQVPIEWGHKVLST  
VLVGPTPVNVVGRNLMTQIGCTLNF  
>143332\_43 1000.0  
PQITLWQRPIVTVKIGGHLVEVLLDTGADDTVVEEINLPGRWPKMIGGIGGFVRVKQYDQVPIEWGHKVLST  
VLVGPTPVNVVGRNLMTQIGCTLNF  
>143332\_44 1000.0  
PQITLWQRPIVTVKIGGHLVEVLLDTGADDTVVEEINLPGRWPKMIGGIGGFVKVKQYDQVPIEWGHKVLSTV  
LVGPTPVNVVGRNLMTQIGCTLNF  
>143332\_45 1000.0  
PQITLWQRPIVTVKIGGHLVEVLLDTGADDTVVEEINLPGRWPKMIGGIGGFVKVKQYDQVPIEWGHKVLSTV  
LVGPTPVNVVGRNLMTQIGCTLNF  
>143332\_46 1000.0  
PQITLWQRPIVTVKIGGHLVEVLLDTGADDTVVEEINLPGRWPKMIGGIGGFVRVKQYDQVPIEWGHKVLSTV  
LVGPTPVNVVGRNLMTQIGCTLNF  
>143332\_47 1000.0  
PQITLWQRPIVTVKIGGHLVEVLLDTGADDTVVEEINLPGRWPKMIGGIGGFVRVKQYDQVPIEWGHKVLSTV  
LVGPTPVNVVGRNLMTQIGCTLNF  
>143332\_72 1000.0  
PQITLWQRPIVTVKVGGHLEVLLDTGADDTVLEEINLPGRWPKMIGGIGGFVKVKQYDQVPIEWGHKVLST  
TVLVGPTPVNVVGRNLMTQIGCTLNF  
>143473\_26 1000.0  
PQITLWQRPIVIVKIGGQIREALLDTGADDTVFEIDLPRWTPKLIIGGIGGFVKVRQYDQVPIEICGHKVISTVL  
VGPTPANIIGRNLMTQLGCTLNF  
>143473\_30 1000.0  
PQITLWQRPIVIVKIGGQIREALLDTGADDTVFEIDLPRWTPKLIIGGIGGFVRVRQYDQVPIEICGHKVISTVL  
VGPTPANIIGRNLMTQLGCTLNF  
>113050\_0 1000.0  
PQITLWQRPFVTVKIGGQITEALLDTGADDTILENINLPGRWPKMIIQGIGGFLKVRQYDQIPIEIEGHKVISV  
VGPTPVNVVGRNVMSQLGCTLNF  
>117139\_0 1000.0  
PQITLWQRPIVTIKIGGQLKEALLDTGADDTVLEEMDLPGRWPKMIVIGIGGLVKVRQYDQIPIEICGHKTIGTV  
LIGPTPANIIGRNLMTQLGCTLNF  
>113192\_1 1000.0



PQITLWQRPVFTMKIGGQLIEALLDTGADDTVLEEISLPGRWKPKIIGGIGGFVKVRQYDQVPIEVFGHKATTT  
VLVGPTPVNVIGRNLMTQLGCTLNF  
>113192\_3 1000.0  
PQITLWQRPVFTMKIGGQLIEALLDTGADDTVLEEISLPGRWKPKIIGGIGGFVKVRQYDQVPIEVFGQKATTT  
VLVGPTPVNVIGRNLMTQLGCTLNF  
>113192\_5 1000.0  
PQITLWQRPVFTMKIGGQLIEALLDTGADDTVLEEISLPGRWKPKIIGGIGGFVKVRQYDQVPVEVFGHKATTT  
VLVGPTPVNVIGRNLMTQLGCTLNF  
>113192\_7 1000.0  
PQITLWQRPVFTMKIGGQLIEALLDTGADDTVLEEISLPGRWKPKIIGGIGGFVKVRQYDQVPVEVFGQKATTT  
VLVGPTPVNVIGRNLMTQLGCTLNF  
>113192\_9 1000.0  
PQITLWQRPVFTMKIGGQIIEALLDTGADDTVLEEISLPGRWKPKIIGGIGGFVKVRQYDQVPIEVFGHKATTTV  
LVGPTPVNVIGRNLMTQLGCTLNF  
>113192\_11 1000.0  
PQITLWQRPVFTMKIGGQIIEALLDTGADDTVLEEISLPGRWKPKIIGGIGGFVKVRQYDQVPIEVFGQKATTTV  
LVGPTPVNVIGRNLMTQLGCTLNF  
>113192\_13 1000.0  
PQITLWQRPVFTMKIGGQIIEALLDTGADDTVLEEISLPGRWKPKIIGGIGGFVKVRQYDQVPVEVFGHKATTT  
VLVGPTPVNVIGRNLMTQLGCTLNF  
>113192\_15 1000.0  
PQITLWQRPVFTMKIGGQIIEALLDTGADDTVLEEISLPGRWKPKIIGGIGGFVKVRQYDQVPVEVFGQKATTT  
VLVGPTPVNVIGRNLMTQLGCTLNF  
>147991\_0 1000.0  
PQITLWQRPVFTVKIGGQLKEALLDTGADDTVIEGINLPGWKPKMIGGIGGFVKVREYEQIPIEICGHKTISTVL  
VGPTPVNVIGRNLMTQLGCTLNF  
>147991\_1 1000.0  
PQITLWQRPVFTVKIGGQLKEALLDTGADDTVIEGINLPGWKPKMIGGIGGFVKVREYEQIPIEICGHKTISTVL  
LVGPTPVNVIGRNLMTQLGCTLNF  
>147991\_2 1000.0  
PQITLWQRPVFTVKIGGQLKEALLDTGADDTVIEGINLPGWKPKMIGGIGGFVKVREYEQIPIEICGHKTISTVL  
VGPTPVNVIGRNLMTQLGCTLNF  
>147991\_3 1000.0  
PQITLWQRPVFTVKIGGQLKEALLDTGADDTVIEGINLPGWKPKMIGGIGGFVKVREYEQIPIEICGHKTISTVL  
LVGPTPVNVIGRNLMTQLGCTLNF  
>147991\_4 1000.0  
PQITLWQRPVFTVKIGGQLKEALLDTGADDTVIEGINLPGWKPKMIGGIGGFVREYEQIPIEICGHKTISTVL  
VGPTPVNVIGRNLMTQLGCTLNF  
>147991\_5 1000.0  
PQITLWQRPVFTVKIGGQLKEALLDTGADDTVIEGINLPGWKPKMIGGIGGFVREYEQIPIEICGHKTISTVL  
LVGPTPVNVIGRNLMTQLGCTLNF  
>147991\_6 1000.0  
PQITLWQRPVFTVKIGGQLKEALLDTGADDTVIEGINLPGWKPKMIGGIGGFVREYEQIPIEICGHKTISTVL  
VGPTPVNVIGRNLMTQLGCTLNF  
>147991\_7 1000.0  
PQITLWQRPVFTVKIGGQLKEALLDTGADDTVIEGINLPGWKPKMIGGIGGFVREYEQIPIEICGHKTISTVL  
LVGPTPVNVIGRNLMTQLGCTLNF  
>147991\_8 1000.0  
PQITLWQRPVFTVKIGGQLKEALLDTGADDTVIEGINLPGWKPKIIGGIGGFVKVREYEQIPIEICGHKTISTVLV  
GPTPVNVIGRNLMTQLGCTLNF  
>147991\_9 1000.0  
PQITLWQRPVFTVKIGGQLKEALLDTGADDTVIEGINLPGWKPKIIGGIGGFVKVREYEQIPIEICGHKTISTVL  
VGPTPVNVIGRNLMTQLGCTLNF  
>147991\_10 1000.0  
PQITLWQRPVFTVKIGGQLKEALLDTGADDTVIEGINLPGWKPKIIGGIGGFVKVREYEQIPIEICGHKTISTVLV  
GPTPVNVIGRNLMTQLGCTLNF  
>147991\_11 1000.0  
PQITLWQRPVFTVKIGGQLKEALLDTGADDTVIEGINLPGWKPKIIGGIGGFVKVREYEQIPIEICGHKTISTVL  
VGPTPVNVIGRNLMTQLGCTLNF  
>147991\_12 1000.0  
PQITLWQRPVFTVKIGGQLKEALLDTGADDTVIEGINLPGWKPKIIGGIGGFVREYEQIPIEICGHKTISTVLV  
GPTPVNVIGRNLMTQLGCTLNF  
>147991\_13 1000.0

PQITLWQRPIVTVKIGGQLKEALLDTGADDTVIEGINLPGKWPKIIGGIGGFVRVREYEQIPIEICGHKTVSTVL  
VGPTPVNVIGRNLMTQLGCTLNF  
>147991\_14 1000.0  
PQITLWQRPIVTVKIGGQLKEALLDTGADDTVIEGINLPGKWPKIIGGIGGFVRVKEYEQIPIEICGHKTISTVLV  
GPTPVNVIGRNLMTQLGCTLNF  
>147991\_15 1000.0  
PQITLWQRPIVTVKIGGQLKEALLDTGADDTVIEGINLPGKWPKIIGGIGGFVRVKEYEQIPIEICGHKTVSTVL  
VGPTPVNVIGRNLMTQLGCTLNF  
>143473\_1 1000.0  
PQITLWQRPIVTVKIGGQLREALLDTGADDTVFEEDIDLPGRWTPKLIGGIGGFVKVRQYDQVPIEICGHKITSTV  
LVGPTPANIIGRNLMTQLGCTLNF  
>187151\_2 1000.0  
PQITLWQRPIITVKIGGHLIEALLDTGADDTVLEEMNLPGRWPKIIGGIGGFVKVRQYDQIPIEICGHKVMGTVL  
VGPTPVNVIGRNLMTQIGCTLNF  
>117041\_0 1000.0  
PQITLWQRPIVTIKVGGQLKEALLDTGADDTVFEEMNLPGRWPKIIGGIGGFVKVRQYDQVPIEFFGHKALTT  
ILVGPTPVNVIGRNLMTQIGVTLNF  
>117041\_1 1000.0  
PQITLWQRPIVTIKVGGQLKEALLDTGADDTVFEEMNLPGRWPKIIGGIGGFVKVRQYDQVPIEFFGHKALTT  
ILVGPTPVNVIGRNLMTQMGVTLNF  
>117041\_2 1000.0  
PQITLWQRPIVTIKVGGQLKEALLDTGADDTVFEEMNLPGRWPKIIGGIGGFVKVRQYDQVPIEFFGHKALTT  
ILVGPTPVNVIGRNLMTQIGVTLNF  
>117041\_3 1000.0  
PQITLWQRPIVTIKVGGQLKEALLDTGADDTVFEEMNLPGRWPKIIGGIGGFVKVRQYDQVPIEFFGHKALTT  
ILVGPTPVNVIGRNLMTQMGVTLNF  
>117041\_4 1000.0  
PQITLWQRPIVTIKVGGQLKEALLDTGADDTVFEEMDLPGRWPKIIGGIGGFVKVRQYDQVPIEFFGHKALTT  
ILVGPTPVNVIGRNLMTQIGVTLNF  
>117041\_5 1000.0  
PQITLWQRPIVTIKVGGQLKEALLDTGADDTVFEEMDLPGRWPKIIGGIGGFVKVRQYDQVPIEFFGHKALTT  
ILVGPTPVNVIGRNLMTQMGVTLNF  
>117041\_6 1000.0  
PQITLWQRPIVTIKVGGQLKEALLDTGADDTVFEEMDLPGRWPKIIGGIGGFVKVRQYDQVPIEFFGHKALTT  
ILVGPTPVNVIGRNLMTQIGVTLNF  
>117041\_7 1000.0  
PQITLWQRPIVTIKVGGQLKEALLDTGADDTVFEEMDLPGRWPKIIGGIGGFVKVRQYDQVPIEFFGHKALTT  
ILVGPTPVNVIGRNLMTQMGVTLNF  
>117041\_8 1000.0  
PQITLWQRPIVTIKVGGQLKEALLDTGADDTVFEENVLPGRWPKIIGGIGGFVKVRQYDQVPIEFFGHKALTT  
ILVGPTPVNVIGRNLMTQIGVTLNF  
>117041\_9 1000.0  
PQITLWQRPIVTIKVGGQLKEALLDTGADDTVFEENVLPGRWPKIIGGIGGFVKVRQYDQVPIEFFGHKALTT  
ILVGPTPVNVIGRNLMTQMGVTLNF  
>117041\_10 1000.0  
PQITLWQRPIVTIKVGGQLKEALLDTGADDTVFEENVLPGRWPKIIGGIGGFVKVRQYDQVPIEFFGHKALTTI  
LVGPTPVNVIGRNLMTQIGVTLNF  
>117041\_11 1000.0  
PQITLWQRPIVTIKVGGQLKEALLDTGADDTVFEENVLPGRWPKIIGGIGGFVKVRQYDQVPIEFFGHKALTTI  
LVGPTPVNVIGRNLMTQMGVTLNF  
>117041\_12 1000.0  
PQITLWQRPIVTIKVGGQLKEALLDTGADDTVFEEDLPGRWPKIIGGIGGFVKVRQYDQVPIEFFGHKALTT  
ILVGPTPVNVIGRNLMTQIGVTLNF  
>117041\_13 1000.0  
PQITLWQRPIVTIKVGGQLKEALLDTGADDTVFEEDLPGRWPKIIGGIGGFVKVRQYDQVPIEFFGHKALTT  
ILVGPTPVNVIGRNLMTQMGVTLNF  
>117041\_14 1000.0  
PQITLWQRPIVTIKVGGQLKEALLDTGADDTVFEEDLPGRWPKIIGGIGGFVKVRQYDQVPIEFFGHKALTTI  
LVGPTPVNVIGRNLMTQIGVTLNF  
>117041\_15 1000.0  
PQITLWQRPIVTIKVGGQLKEALLDTGADDTVFEEDLPGRWPKIIGGIGGFVKVRQYDQVPIEFFGHKALTTI  
LVGPTPVNVIGRNLMTQMGVTLNF  
>117041\_16 1000.0

PQITLWQRPIVTIKVGGQLKEALLDTGADDTVFDENMLPGRWPKKIIGGIGGFMKVRQYDQVPIEFFGHKALT  
TILVGPTPVNVIGRNLMTQIGVTLNF  
>117041\_17 1000.0  
PQITLWQRPIVTIKVGGQLKEALLDTGADDTVFDENMLPGRWPKKIIGGIGGFMKVRQYDQVPIEFFGHKALT  
TILVGPTPVNVIGRNLMTQMGVTLNF  
>117041\_18 1000.0  
PQITLWQRPIVTIKVGGQLKEALLDTGADDTVFDENMLPGRWPKKIIGGIGGFVKVRQYDQVPIEFFGHKALT  
ILVGPTPVNVIGRNLMTQIGVTLNF  
>117041\_19 1000.0  
PQITLWQRPIVTIKVGGQLKEALLDTGADDTVFDENMLPGRWPKKIIGGIGGFVKVRQYDQVPIEFFGHKALT  
ILVGPTPVNVIGRNLMTQMGVTLNF  
>117041\_20 1000.0  
PQITLWQRPIVTIKVGGQLKEALLDTGADDTVFDENMLPGRWPKKIIGGIGGFMKVRQYDQVPIEFFGHKALT  
TILVGPTPVNVIGRNLMTQIGVTLNF  
>117041\_21 1000.0  
PQITLWQRPIVTIKVGGQLKEALLDTGADDTVFDENMLPGRWPKKIIGGIGGFMKVRQYDQVPIEFFGHKALT  
TILVGPTPVNVIGRNLMTQMGVTLNF  
>117041\_22 1000.0  
PQITLWQRPIVTIKVGGQLKEALLDTGADDTVFDENMLPGRWPKKIIGGIGGFVKVRQYDQVPIEFFGHKALT  
ILVGPTPVNVIGRNLMTQIGVTLNF  
>117041\_23 1000.0  
PQITLWQRPIVTIKVGGQLKEALLDTGADDTVFDENMLPGRWPKKIIGGIGGFVKVRQYDQVPIEFFGHKALT  
ILVGPTPVNVIGRNLMTQMGVTLNF

**Sequences for the SQV-susceptible ensemble**

>102782\_40 0.3  
PQITLWQRPIVTIKVEGQLKEAPLDTGADDTVLEDVNLPRWPKMIGGLGGFIKVRQYDQIHIEICGHKAIGT  
VLVGPTPVNIIGRNMLTQIGCTLNF  
>102782\_41 0.3  
PQITLWQRPIVTIKVEGQLKEAPLDTGADDTVLEDVNLPRWPKMIGGLGGFIKVRQYDQIHIEICGHKAIGT  
VLVGPTPVNIIGRSMLTQIGCTLNF  
>102782\_42 0.3  
PQITLWQRPIVTIKVEGQLKEAPLDTGADDTVLEDVNLPRWPKMIGGLGGFIKVRQYDQIHIEICGHKAIGT  
VLIGPTPVNIIGRNMLTQIGCTLNF  
>102782\_43 0.3  
PQITLWQRPIVTIKVEGQLKEAPLDTGADDTVLEDVNLPRWPKMIGGLGGFIKVRQYDQIHIEICGHKAIGT  
VLIGPTPVNIIGRSMLTQIGCTLNF  
>13246\_1 0.1  
PQITLWQRPLVTIKIGGQLKEALLDTGADDTVLEENMLPGRWPKMIGGIGGFVKVRQYDQISVEICGHKATGT  
VLIGPTPTNIIGRNLLTQIGCTLNF  
>13246\_3 0.1  
PQITLWQRPLVTIKIGGQLKEALLDTGADDTVLEENMLPGRWPKKIIGGIGGFVKVRQYDQISVEICGHKATGT  
LIGPTPTNIIGRNLLTQIGCTLNF  
>13246\_5 0.1  
PQITLWQRPLVTIKIGGQLKEALLDTGADDTVLEENMLPGRWPKMIGGIGGFVKVRQYDQISVEICGHKATGT  
VLIGPTPTNIIGRNLLTQIGCTLNF  
>13246\_7 0.1  
PQITLWQRPLVTIKIGGQLKEALLDTGADDTVLEENMLPGRWPKKIIGGIGGFVKVRQYDQISVEICGHKATGT  
LIGPTPTNIIGRNLLTQIGCTLNF  
>13246\_9 0.1  
PQITLWQRPFVTIKIGGQLKEALLDTGADDTVLEENMLPGRWPKMIGGIGGFVKVRQYDQISVEICGHKATGT  
VLIGPTPTNIIGRNLLTQIGCTLNF  
>13246\_11 0.1  
PQITLWQRPFVTIKIGGQLKEALLDTGADDTVLEENMLPGRWPKKIIGGIGGFVKVRQYDQISVEICGHKATGT  
LIGPTPTNIIGRNLLTQIGCTLNF  
>13246\_13 0.1  
PQITLWQRPFVTIKIGGQLKEALLDTGADDTVLEENMLPGRWPKMIGGIGGFVKVRQYDQISVEICGHKATGT  
VLIGPTPTNIIGRNLLTQIGCTLNF  
>13246\_15 0.1  
PQITLWQRPFVTIKIGGQLKEALLDTGADDTVLEENMLPGRWPKKIIGGIGGFVKVRQYDQISVEICGHKATGT  
LIGPTPTNIIGRNLLTQIGCTLNF  
>13246\_0 0.1  
PQITLWQRPLVTIKIGGQLKEALLDTGADDTVLEENMLPGRWPKMIGGIGGFVKVRQYDQISVEICGHKATGT

VLIGPTPANIIGRNLLTQIGCTLNF  
>13246\_2 0.1  
PQITLWQRPLVTIKIGGQLKEALLDTGADDTVLEEMNLPGRWPKIIGGIGGFIKVRQYDQISVEICGHKATGTV  
LIGPTPANIIGRNLLTQIGCTLNF  
>13246\_4 0.1  
PQITLWQRPLVTIKIGGQLKEALLDTGADDTVLEELNLPGRWPKMIGGIGGFIKVRQYDQISVEICGHKATGT  
VLIGPTPANIIGRNLLTQIGCTLNF  
>13246\_6 0.1  
PQITLWQRPLVTIKIGGQLKEALLDTGADDTVLEELNLPGRWPKIIGGIGGFIKVRQYDQISVEICGHKATGTV  
LIGPTPANIIGRNLLTQIGCTLNF  
>13246\_8 0.1  
PQITLWQRPFVTIKIGGQLKEALLDTGADDTVLEEMNLPGRWPKMIGGIGGFIKVRQYDQISVEICGHKATGT  
VLIGPTPANIIGRNLLTQIGCTLNF  
>13246\_10 0.1  
PQITLWQRPFVTIKIGGQLKEALLDTGADDTVLEEMNLPGRWPKIIGGIGGFIKVRQYDQISVEICGHKATGTV  
LIGPTPANIIGRNLLTQIGCTLNF  
>13246\_12 0.1  
PQITLWQRPFVTIKIGGQLKEALLDTGADDTVLEELNLPGRWPKMIGGIGGFIKVRQYDQISVEICGHKATGT  
VLIGPTPANIIGRNLLTQIGCTLNF  
>13246\_14 0.1  
PQITLWQRPFVTIKIGGQLKEALLDTGADDTVLEELNLPGRWPKIIGGIGGFIKVRQYDQISVEICGHKATGTV  
LIGPTPANIIGRNLLTQIGCTLNF  
>55835\_1 0.2  
PQITLWQRPLVPIKIGGQIKEALLDTGADDTILEDINLPGRWPKPMAGGIGGFIKVRQYDQIPVEICGHKVIPTVL  
VGPTPVNIIGRNLLTQLGCTLNF  
>55835\_3 0.2  
PQITLWQRPLVPIKIGGQIKEALLDTGADDTILEDINLPGRWPKPMAGGIGGFIKVRQYDQIPVEICGHKVIPTVL  
VGPTPVNIIGRNLLTQLGCTLNF  
>55835\_5 0.2  
PQITLWQRPLVPIKIGGQIKEALLDTGADDTILEDINLPGRWPKPLAGGIGGFIKVRQYDQIPVEICGHKVIPTVL  
VGPTPVNIIGRNLLTQLGCTLNF  
>55835\_7 0.2  
PQITLWQRPLVPIKIGGQIKEALLDTGADDTILEDINLPGRWPKPLAGGIGGFIKVRQYDQIPVEICGHKVIPTVL  
VGPTPVNIIGRNLLTQLGCTLNF  
>55835\_9 0.2  
PQITLWQRPLVPIKIGGQIKEALLDTGADDTILEDINLPGRWPKPMAGGIGGFIKVRQYDQIPVEICGHKVIPTVL  
VGPTPVNIIGRNLLTQLGCTLNF  
>55835\_11 0.2  
PQITLWQRPLVPIKIGGQIKEALLDTGADDTILEDINLPGRWPKPMAGGIGGFIKVRQYDQIPVEICGHKVIPTVL  
VGPTPVNIIGRNLLTQLGCTLNF  
>55835\_13 0.2  
PQITLWQRPLVPIKIGGQIKEALLDTGADDTILEDINLPGRWPKPLAGGIGGFIKVRQYDQIPVEICGHKVIPTVL  
VGPTPVNIIGRNLLTQLGCTLNF  
>55835\_15 0.2  
PQITLWQRPLVPIKIGGQIKEALLDTGADDTILEDINLPGRWPKPLAGGIGGFIKVRQYDQIPVEICGHKVIPTVL  
VGPTPVNIIGRNLLTQLGCTLNF  
>55835\_33 0.2  
PQITLWQRPIVPIKIGGQIKEALLDTGADDTILEDINLPGRWPKPMAGGIGGFIKVRQYDQIPVEICGHKVIPTVL  
VGPTPVNIIGRNLLTQLGCTLNF  
>55835\_35 0.2  
PQITLWQRPIVPIKIGGQIKEALLDTGADDTILEDINLPGRWPKPMAGGIGGFIKVRQYDQIPVEICGHKVIPTVL  
VGPTPVNIIGRNLLTQLGCTLNF  
>55835\_37 0.2  
PQITLWQRPIVPIKIGGQIKEALLDTGADDTILEDINLPGRWPKPLAGGIGGFIKVRQYDQIPVEICGHKVIPTVL  
VGPTPVNIIGRNLLTQLGCTLNF  
>55835\_39 0.2  
PQITLWQRPIVPIKIGGQIKEALLDTGADDTILEDINLPGRWPKPLAGGIGGFIKVRQYDQIPVEICGHKVIPTVL  
VGPTPVNIIGRNLLTQLGCTLNF  
>55835\_41 0.2  
PQITLWQRPIVPIKIGGQIKEALLDTGADDTILEDINLPGRWPKPMAGGIGGFIKVRQYDQIPVEICGHKVIPTVL  
VGPTPVNIIGRNLLTQLGCTLNF  
>55835\_43 0.2  
PQITLWQRPIVPIKIGGQIKEALLDTGADDTILEDINLPGRWPKPMAGGIGGFIKVRQYDQIPVEICGHKVIPTVL

VGPTPVNIIGRNLLTQLGCTLNF  
>55835\_45 0.2  
PQITLWQRPIVPIKIGGQIKEALLDTGADDTILEDINLPGKWPKLAGGIGGFIKVRQYDQIPVEICGHKVIQTVL  
VGPTPVNIIGRNLLTQLGCTLNF  
>55835\_47 0.2  
PQITLWQRPIVPIKIGGQIKEALLDTGADDTILEDINLPGKWPKLAGGIGGFIKVRQYDHIPVEICGHKVIQTVLV  
GPTPVNIIGRNLLTQLGCTLNF  
>55835\_0 0.2  
PQITLWQRPLVPIKIGGQIKEALLDTGADDTILEDINLPGRWPKPMAGGIGGFIKVRQYDQIPVEICGHKAIGTVL  
VGPTPVNIIGRNLLTQLGCTLNF  
>55835\_2 0.2  
PQITLWQRPLVPIKIGGQIKEALLDTGADDTILEDINLPGRWPKPMAGGIGGFIKVRQYDHIPVEICGHKAIGTVL  
VGPTPVNIIGRNLLTQLGCTLNF  
>55835\_4 0.2  
PQITLWQRPLVPIKIGGQIKEALLDTGADDTILEDINLPGRWPKPKLAGGIGGFIKVRQYDQIPVEICGHKAIGTVL  
VGPTPVNIIGRNLLTQLGCTLNF  
>55835\_6 0.2  
PQITLWQRPLVPIKIGGQIKEALLDTGADDTILEDINLPGRWPKPKLAGGIGGFIKVRQYDHIPVEICGHKAIGTVL  
VGPTPVNIIGRNLLTQLGCTLNF  
>55835\_8 0.2  
PQITLWQRPLVPIKIGGQIKEALLDTGADDTILEDINLPGKWPKPMAGGIGGFIKVRQYDQIPVEICGHKAIGTVL  
VGPTPVNIIGRNLLTQLGCTLNF  
>55835\_10 0.2  
PQITLWQRPLVPIKIGGQIKEALLDTGADDTILEDINLPGKWPKPMAGGIGGFIKVRQYDHIPVEICGHKAIGTVL  
VGPTPVNIIGRNLLTQLGCTLNF  
>55835\_12 0.2  
PQITLWQRPLVPIKIGGQIKEALLDTGADDTILEDINLPGKWPKPKLAGGIGGFIKVRQYDQIPVEICGHKAIGTVL  
VGPTPVNIIGRNLLTQLGCTLNF  
>55835\_14 0.2  
PQITLWQRPLVPIKIGGQIKEALLDTGADDTILEDINLPGKWPKPKLAGGIGGFIKVRQYDHIPVEICGHKAIGTVL  
VGPTPVNIIGRNLLTQLGCTLNF  
>55835\_32 0.2  
PQITLWQRPIVPIKIGGQIKEALLDTGADDTILEDINLPGRWPKPMAGGIGGFIKVRQYDQIPVEICGHKAIGTVL  
VGPTPVNIIGRNLLTQLGCTLNF  
>55835\_34 0.2  
PQITLWQRPIVPIKIGGQIKEALLDTGADDTILEDINLPGRWPKPMAGGIGGFIKVRQYDHIPVEICGHKAIGTVL  
VGPTPVNIIGRNLLTQLGCTLNF  
>55835\_36 0.2  
PQITLWQRPIVPIKIGGQIKEALLDTGADDTILEDINLPGRWPKPKLAGGIGGFIKVRQYDQIPVEICGHKAIGTVL  
VGPTPVNIIGRNLLTQLGCTLNF  
>55835\_38 0.2  
PQITLWQRPIVPIKIGGQIKEALLDTGADDTILEDINLPGRWPKPKLAGGIGGFIKVRQYDHIPVEICGHKAIGTVL  
VGPTPVNIIGRNLLTQLGCTLNF  
>55835\_40 0.2  
PQITLWQRPIVPIKIGGQIKEALLDTGADDTILEDINLPGKWPKPMAGGIGGFIKVRQYDQIPVEICGHKAIGTVL  
VGPTPVNIIGRNLLTQLGCTLNF  
>55835\_42 0.2  
PQITLWQRPIVPIKIGGQIKEALLDTGADDTILEDINLPGKWPKPMAGGIGGFIKVRQYDHIPVEICGHKAIGTVL  
VGPTPVNIIGRNLLTQLGCTLNF  
>55835\_44 0.2  
PQITLWQRPIVPIKIGGQIKEALLDTGADDTILEDINLPGKWPKPKLAGGIGGFIKVRQYDQIPVEICGHKAIGTVL  
VGPTPVNIIGRNLLTQLGCTLNF  
>55835\_46 0.2  
PQITLWQRPIVPIKIGGQIKEALLDTGADDTILEDINLPGKWPKPKLAGGIGGFIKVRQYDHIPVEICGHKAIGTVLV  
GPTPVNIIGRNLLTQLGCTLNF  
>68210\_0 0.2  
PQITLWQRPLVSVKVGQIKEALLDTGADDTILEEMNLPGRWPKPMAGGIGGFIKVRQYDNILIEICGHKAIGT  
VLVGPTPVNIIGRNLLTQIGCTLNF  
>68210\_1 0.2  
PQITLWQRPLVSVKVGQIKEALLDTGADDTILEEMNLPGRWPKPKIAGGIGGFIKVRQYDNILIEICGHKAIGTV  
LVGPTPVNIIGRNLLTQIGCTLNF  
>102782\_3 0.3  
PQITLWQRPIVTIKVEGQLKEALLDTGADDTVLEDMNLPGRWPKPKMIGGLGGFIKVRQYDQIHIEICGHKAIGT

VLIGPTPVNIIGRSMLTQIGCTLNF  
>102782\_8 0.3  
PQITLWQRPIVTIKVEGQLKEALLDTGADDTVLEDVNLPGRWPKMIGGLGGFIKVRQYDQIHIEICGHKAIGT  
VLVGPTPVNIIGRNMLTQIGCTLNF  
>102782\_9 0.3  
PQITLWQRPIVTIKVEGQLKEALLDTGADDTVLEDVNLPGRWPKMIGGLGGFIKVRQYDQIHIEICGHKAIGT  
VLVGPTPVNIIGRSMLTQIGCTLNF  
>102782\_10 0.3  
PQITLWQRPIVTIKVEGQLKEALLDTGADDTVLEDVNLPGRWPKMIGGLGGFIKVRQYDQIHIEICGHKAIGT  
VLIGPTPVNIIGRNMLTQIGCTLNF  
>102782\_11 0.3  
PQITLWQRPIVTIKVEGQLKEALLDTGADDTVLEDVNLPGRWPKMIGGLGGFIKVRQYDQIHIEICGHKAIGT  
VLIGPTPVNIIGRSMLTQIGCTLNF  
>102782\_136 0.3  
PQITLWQRPIVTIKVEGQLTEALLDTGADDTVLEDVNLPGRWPKMIGGLGGFIKVRQYDQIHIEICGHKAIGTV  
LVGPTPVNIIGRNMLTQIGCTLNF  
>102782\_137 0.3  
PQITLWQRPIVTIKVEGQLTEALLDTGADDTVLEDVNLPGRWPKMIGGLGGFIKVRQYDQIHIEICGHKAIGTV  
LVGPTPVNIIGRSMLTQIGCTLNF  
>102782\_138 0.3  
PQITLWQRPIVTIKVEGQLTEALLDTGADDTVLEDVNLPGRWPKMIGGLGGFIKVRQYDQIHIEICGHKAIGTV  
LIGPTPVNIIGRNMLTQIGCTLNF  
>102782\_139 0.3  
PQITLWQRPIVTIKVEGQLTEALLDTGADDTVLEDVNLPGRWPKMIGGLGGFIKVRQYDQIHIEICGHKAIGTV  
LIGPTPVNIIGRSMLTQIGCTLNF  
>102782\_144 0.3  
PQITLWQRPIVTIKVEGQLTEALLDTGADDTVLEDVNLPGRWPKMIGGLGGFIKVRQYDQIHIEICGHKAIGT  
VLVGPTPVNIIGRNMLTQIGCTLNF  
>55835\_17 0.2  
PQITLWQRPLVSIKIGGQIKEALLDTGADDTILEDINLPGRWPKMAGGIGGFIKVRQYDQIPVEICGHKVIPTVL  
VGPTPVNIIGRNLLTQLGCTLNF  
>55835\_19 0.2  
PQITLWQRPLVSIKIGGQIKEALLDTGADDTILEDINLPGRWPKMAGGIGGFIKVRQYDQIPVEICGHKVIPTVL  
VGPTPVNIIGRNLLTQLGCTLNF  
>55835\_21 0.2  
PQITLWQRPLVSIKIGGQIKEALLDTGADDTILEDINLPGRWPKMAGGIGGFIKVRQYDQIPVEICGHKVIPTVL  
VGPTPVNIIGRNLLTQLGCTLNF  
>55835\_23 0.2  
PQITLWQRPLVSIKIGGQIKEALLDTGADDTILEDINLPGRWPKMAGGIGGFIKVRQYDQIPVEICGHKVIPTVL  
VGPTPVNIIGRNLLTQLGCTLNF  
>55835\_25 0.2  
PQITLWQRPLVSIKIGGQIKEALLDTGADDTILEDINLPGRWPKMAGGIGGFIKVRQYDQIPVEICGHKVIPTVL  
VGPTPVNIIGRNLLTQLGCTLNF  
>55835\_27 0.2  
PQITLWQRPLVSIKIGGQIKEALLDTGADDTILEDINLPGRWPKMAGGIGGFIKVRQYDQIPVEICGHKVIPTVL  
VGPTPVNIIGRNLLTQLGCTLNF  
>55835\_29 0.2  
PQITLWQRPLVSIKIGGQIKEALLDTGADDTILEDINLPGRWPKMAGGIGGFIKVRQYDQIPVEICGHKVIPTVL  
VGPTPVNIIGRNLLTQLGCTLNF  
>55835\_31 0.2  
PQITLWQRPLVSIKIGGQIKEALLDTGADDTILEDINLPGRWPKMAGGIGGFIKVRQYDQIPVEICGHKVIPTVL  
VGPTPVNIIGRNLLTQLGCTLNF  
>55835\_49 0.2  
PQITLWQRPIVSIKIGGQIKEALLDTGADDTILEDINLPGRWPKMAGGIGGFIKVRQYDQIPVEICGHKVIPTVL  
VGPTPVNIIGRNLLTQLGCTLNF  
>55835\_51 0.2  
PQITLWQRPIVSIKIGGQIKEALLDTGADDTILEDINLPGRWPKMAGGIGGFIKVRQYDQIPVEICGHKVIPTVL  
VGPTPVNIIGRNLLTQLGCTLNF  
>55835\_53 0.2  
PQITLWQRPIVSIKIGGQIKEALLDTGADDTILEDINLPGRWPKMAGGIGGFIKVRQYDQIPVEICGHKVIPTVL  
VGPTPVNIIGRNLLTQLGCTLNF  
>55835\_55 0.2  
PQITLWQRPIVSIKIGGQIKEALLDTGADDTILEDINLPGRWPKMAGGIGGFIKVRQYDQIPVEICGHKVIPTVL

VGPTPVNIIGRNLLTQLGCTLNF  
>55835\_57 0.2  
PQITLWQRPIVSIKIGGQIKEALLDTGADDTILEDINLPGWKPKMAGGIGGFIKVRQYDQIPVEICGHKVIQTVL  
VGPTPVNIIGRNLLTQLGCTLNF  
>55835\_59 0.2  
PQITLWQRPIVSIKIGGQIKEALLDTGADDTILEDINLPGWKPKMAGGIGGFIKVRQYDHIPVEICGHKVIQTVL  
VGPTPVNIIGRNLLTQLGCTLNF  
>55835\_61 0.2  
PQITLWQRPIVSIKIGGQIKEALLDTGADDTILEDINLPGWKPKLAGGIGGFIKVRQYDQIPVEICGHKVIQTVL  
VGPTPVNIIGRNLLTQLGCTLNF  
>55835\_63 0.2  
PQITLWQRPIVSIKIGGQIKEALLDTGADDTILEDINLPGWKPKLAGGIGGFIKVRQYDHIPVEICGHKVIQTVL  
GPTPVNIIGRNLLTQLGCTLNF  
>55835\_16 0.2  
PQITLWQRPLVSIKIGGQIKEALLDTGADDTILEDINLPGRWPKPKMAGGIGGFIKVRQYDQIPVEICGHKAIGTVL  
VGPTPVNIIGRNLLTQLGCTLNF  
>55835\_18 0.2  
PQITLWQRPLVSIKIGGQIKEALLDTGADDTILEDINLPGRWPKPKMAGGIGGFIKVRQYDHIPVEICGHKAIGTVL  
VGPTPVNIIGRNLLTQLGCTLNF  
>55835\_20 0.2  
PQITLWQRPLVSIKIGGQIKEALLDTGADDTILEDINLPGRWPKPKLAGGIGGFIKVRQYDQIPVEICGHKAIGTVL  
VGPTPVNIIGRNLLTQLGCTLNF  
>55835\_22 0.2  
PQITLWQRPLVSIKIGGQIKEALLDTGADDTILEDINLPGRWPKPKLAGGIGGFIKVRQYDHIPVEICGHKAIGTVL  
VGPTPVNIIGRNLLTQLGCTLNF  
>55835\_24 0.2  
PQITLWQRPLVSIKIGGQIKEALLDTGADDTILEDINLPGWKPKMAGGIGGFIKVRQYDQIPVEICGHKAIGTVL  
VGPTPVNIIGRNLLTQLGCTLNF  
>55835\_26 0.2  
PQITLWQRPLVSIKIGGQIKEALLDTGADDTILEDINLPGWKPKMAGGIGGFIKVRQYDHIPVEICGHKAIGTVL  
VGPTPVNIIGRNLLTQLGCTLNF  
>55835\_28 0.2  
PQITLWQRPLVSIKIGGQIKEALLDTGADDTILEDINLPGWKPKLAGGIGGFIKVRQYDQIPVEICGHKAIGTVL  
VGPTPVNIIGRNLLTQLGCTLNF  
>55835\_30 0.2  
PQITLWQRPLVSIKIGGQIKEALLDTGADDTILEDINLPGWKPKLAGGIGGFIKVRQYDHIPVEICGHKAIGTVL  
VGPTPVNIIGRNLLTQLGCTLNF  
>55835\_48 0.2  
PQITLWQRPIVSIKIGGQIKEALLDTGADDTILEDINLPGRWPKPKMAGGIGGFIKVRQYDQIPVEICGHKAIGTVL  
VGPTPVNIIGRNLLTQLGCTLNF  
>55835\_50 0.2  
PQITLWQRPIVSIKIGGQIKEALLDTGADDTILEDINLPGRWPKPKMAGGIGGFIKVRQYDHIPVEICGHKAIGTVL  
VGPTPVNIIGRNLLTQLGCTLNF  
>55835\_52 0.2  
PQITLWQRPIVSIKIGGQIKEALLDTGADDTILEDINLPGRWPKPKLAGGIGGFIKVRQYDQIPVEICGHKAIGTVL  
VGPTPVNIIGRNLLTQLGCTLNF  
>55835\_54 0.2  
PQITLWQRPIVSIKIGGQIKEALLDTGADDTILEDINLPGRWPKPKLAGGIGGFIKVRQYDHIPVEICGHKAIGTVL  
VGPTPVNIIGRNLLTQLGCTLNF  
>55835\_56 0.2  
PQITLWQRPIVSIKIGGQIKEALLDTGADDTILEDINLPGWKPKMAGGIGGFIKVRQYDQIPVEICGHKAIGTVL  
VGPTPVNIIGRNLLTQLGCTLNF  
>55835\_58 0.2  
PQITLWQRPIVSIKIGGQIKEALLDTGADDTILEDINLPGWKPKMAGGIGGFIKVRQYDHIPVEICGHKAIGTVL  
VGPTPVNIIGRNLLTQLGCTLNF  
>55835\_60 0.2  
PQITLWQRPIVSIKIGGQIKEALLDTGADDTILEDINLPGWKPKLAGGIGGFIKVRQYDQIPVEICGHKAIGTVL  
VGPTPVNIIGRNLLTQLGCTLNF  
>55835\_62 0.2  
PQITLWQRPIVSIKIGGQIKEALLDTGADDTILEDINLPGWKPKLAGGIGGFIKVRQYDHIPVEICGHKAIGTVL  
GPTPVNIIGRNLLTQLGCTLNF  
>75096\_0 0.2  
PQITLWQRPLVTIKIGGQLKEALLDTGADDTILEEMNLPGRWPKPKMVGIGGFIKVRQYDEIPIEICGHKAIGTV

LVGPTPANIIGRNLLTQLGCTLNF  
>41547\_0 0.2  
PQITLWQRPLVTIKIGGQLKEALLDTGADDTVLEEMNLPGRWPKPKMIGGIGGFIKVRQYDQILVEICGHKAMGT  
VLVGPTPVNIIIGRNLLTQIGCTLNF  
>44074\_0 0.1  
PQITLWQRPLVTVKIGGQLKEALLDTGADDTVLEEMDLPGRWPKPKMIGGIGGFIKVRQYDQILIEICGHRAIGT  
VLVGPTPVNIIIGRNLLTQIGCTLNF  
>44074\_1 0.1  
PQITLWQRPLVTVRIGGQLKEALLDTGADDTVLEEMDLPGRWPKPKMIGGIGGFIKVRQYDQILIEICGHRAIGT  
VLVGPTPVNIIIGRNLLTQIGCTLNF

**Sequences for the TPV-resistant ensemble**

>103779\_0 200.0  
PQITLWQRPIIKVKIGGQLVEALLDTGADDTILEGINLPGRWPKPKIVGGIGGFMKVKEYDQIPVEICGHKIISTVLV  
GPTPVNIIIGRNVMTQIGCTLNF  
>103779\_1 200.0  
PQITLWQRPIIKVKIGGQLVEALLDTGADDTILEGINLPGRWPKPKIVGGIGGFMKVKEYDQIPVEICGHKIISTVLV  
GPTPVNVIGRNVMTQIGCTLNF  
>103779\_2 200.0  
PQITLWQRPIIKVKIGGQLVEALLDTGADDTILEGINLPGRWPKPKIVGGIGGFMKVKEYDQIPVEICGHKVISTVL  
VGPTPVNIIIGRNVMTQIGCTLNF  
>103779\_3 200.0  
PQITLWQRPIIKVKIGGQLVEALLDTGADDTILEGINLPGRWPKPKIVGGIGGFMKVKEYDQIPVEICGHKVISTVL  
VGPTPVNVIGRNVMTQIGCTLNF  
>103779\_4 200.0  
PQITLWQRPIIKVKIGGQLVEALLDTGADDTILEGIDLPGRWPKPKIVGGIGGFMKVKEYDQIPVEICGHKIISTVLV  
GPTPVNIIIGRNVMTQIGCTLNF  
>103779\_5 200.0  
PQITLWQRPIIKVKIGGQLVEALLDTGADDTILEGIDLPGRWPKPKIVGGIGGFMKVKEYDQIPVEICGHKIISTVLV  
GPTPVNVIGRNVMTQIGCTLNF  
>103779\_6 200.0  
PQITLWQRPIIKVKIGGQLVEALLDTGADDTILEGIDLPGRWPKPKIVGGIGGFMKVKEYDQIPVEICGHKVISTVL  
VGPTPVNIIIGRNVMTQIGCTLNF  
>103779\_7 200.0  
PQITLWQRPIIKVKIGGQLVEALLDTGADDTILEGIDLPGRWPKPKIVGGIGGFMKVKEYDQIPVEICGHKVISTVL  
VGPTPVNVIGRNVMTQIGCTLNF  
>103779\_8 200.0  
PQITLWQRPIIKVKIGGQLVEALLDTGADDTIFEGINLPGRWPKPKIVGGIGGFMKVKEYDQIPVEICGHKIISTVL  
VGPTPVNIIIGRNVMTQIGCTLNF  
>103779\_9 200.0  
PQITLWQRPIIKVKIGGQLVEALLDTGADDTIFEGINLPGRWPKPKIVGGIGGFMKVKEYDQIPVEICGHKIISTVL  
VGPTPVNVIGRNVMTQIGCTLNF  
>103779\_10 200.0  
PQITLWQRPIIKVKIGGQLVEALLDTGADDTIFEGINLPGRWPKPKIVGGIGGFMKVKEYDQIPVEICGHKVISTVL  
VGPTPVNIIIGRNVMTQIGCTLNF  
>103779\_11 200.0  
PQITLWQRPIIKVKIGGQLVEALLDTGADDTIFEGINLPGRWPKPKIVGGIGGFMKVKEYDQIPVEICGHKVISTVL  
VGPTPVNVIGRNVMTQIGCTLNF  
>103779\_12 200.0  
PQITLWQRPIIKVKIGGQLVEALLDTGADDTIFEGIDLPGRWPKPKIVGGIGGFMKVKEYDQIPVEICGHKIISTVL  
VGPTPVNIIIGRNVMTQIGCTLNF  
>103779\_13 200.0  
PQITLWQRPIIKVKIGGQLVEALLDTGADDTIFEGIDLPGRWPKPKIVGGIGGFMKVKEYDQIPVEICGHKIISTVL  
VGPTPVNVIGRNVMTQIGCTLNF  
>103779\_14 200.0  
PQITLWQRPIIKVKIGGQLVEALLDTGADDTIFEGIDLPGRWPKPKIVGGIGGFMKVKEYDQIPVEICGHKVISTVL  
VGPTPVNIIIGRNVMTQIGCTLNF  
>103779\_15 200.0  
PQITLWQRPIIKVKIGGQLVEALLDTGADDTIFEGIDLPGRWPKPKIVGGIGGFMKVKEYDQIPVEICGHKVISTVL  
VGPTPVNVIGRNVMTQIGCTLNF  
>147550\_0 200.0  
PQITLWQRPIIKVKIGGQLVEALLDTGADDTIFEGIDLPGRWPKPKIVGGIGGFMKVKEYDQIPVEICGHKVISTVL  
LVGPTPVNVIGRNVMTQIGCTLNF



>117063\_1 200.0  
PQITLWQRPVVTVKVAGQLREALDGTGADDTIFEEINLPGRWTPKIVGGIGGFVVKVRQYDQPIEICGHKVISTV  
LVGPTPTNIIIGNLMTQIGCTLNF

>123049\_0 200.0  
PQITLWQRPPIITIKIGGQLKDVLMMDTGADDTVLEDIDLPGRWKPKLIGGIGGFVVKVRQYDHPVVEVCGHKVTTT  
VLVGPTPVDVIGRNLLTQIGCTLNF

>123049\_1 200.0  
PQITLWQRPPIITIKIGGQLKDVLMMDTGADDTVLEDIDLPGRWKPKLIGGIGGFVVKVRQYDNVPVEVCGHKVTTT  
VLVGPTPVDVIGRNLLTQIGCTLNF

>123049\_2 200.0  
PQITLWQRPPIITIKIGGQLKDVLMMDTGADDTVLEDIDLPGRWKPKLIGGIGGFVVKVRQYDHPVVEVCGHKVTTT  
VLVGPTPVDVIGRNLLTQIGCTLNF

>115065\_2 200.0  
PQITLWQRPVVTVKIAGQLKEALIDTGADDTIFFEMNLPGRWKPKLIGGIGGFVVKVRQYDQPIEICGHKVVTG  
VLIGPTPTNVIGRNLLTQIGCTLNF

>115065\_3 200.0  
PQITLWQRPVVTVKIAGQLKEALIDTGADDTIFFEMDLPGRWKPKLIGGIGGFVVKVRQYDQPIEICGHKVVTG  
VLIGPTPTNVIGRNLLTQIGCTLNF

>117119\_0 200.0  
PQITLWQRPVIVTVKIAGQLKEALLDTGADDTVFEEMNLPGRWTPKLIGGIGGFVVKVRQYDQPIEICGHKVIGPV  
LVGPTPANVIGRNLMSTQIGCTLNF

>117119\_1 200.0  
PQITLWQRPVIVTVKIAGQLKEALLDTGADDTVFEEMNLPGRWTPKLIGGIGGFVVKVRQYDQVPIEICGHKVIGP  
VLVGPTPANVIGRNLMSTQIGCTLNF

>117119\_2 200.0  
PQITLWQRPVIVTVRIAGQLKEALLDTGADDTVFEEMNLPGRWTPKLIGGIGGFVVKVRQYDQPIEICGHKVIGP  
VLVGPTPANVIGRNLMSTQIGCTLNF

>117119\_3 200.0  
PQITLWQRPVIVTVRIAGQLKEALLDTGADDTVFEEMNLPGRWTPKLIGGIGGFVVKVRQYDQVPIEICGHKVIGP  
VLVGPTPANVIGRNLMSTQIGCTLNF

>116529\_1 200.0  
PQITLWQRPVIVTVKIGGQVKEALLDTGADDTVFEEMNLPGRWKPKMIGGIGGFVVKVRQYDQPIEICGHKVIGP  
VLVGPTPLNVIGRNLMTQMGCTLNF

>116529\_2 200.0  
PQITLWQRPVIVTVKIGGQVKEALLDTGADDTVFEEMNLPGRWKPKMIGGIGGFVVKVRQYDQVPIEICGHKVIG  
PVLVGPTPLNVIGRNLMTQIGCTLNF

>116529\_3 200.0  
PQITLWQRPVIVTVKIGGQVKEALLDTGADDTVFEEMNLPGRWKPKMIGGIGGFVVKVRQYDQVPIEICGHKVIG  
PVLVGPTPLNVIGRNLMTQMGCTLNF

>116529\_4 200.0  
PQITLWQRPVIVTVKIGGQVKEALLDTGADDTVFEEMNLPGRWKPRMIGGIGGFVVKVRQYDQPIEICGHKVIGP  
VLVGPTPLNVIGRNLMTQIGCTLNF

>116529\_5 200.0  
PQITLWQRPVIVTVKIGGQVKEALLDTGADDTVFEEMNLPGRWKPRMIGGIGGFVVKVRQYDQPIEICGHKVIGP  
VLVGPTPLNVIGRNLMTQMGCTLNF

>116529\_6 200.0  
PQITLWQRPVIVTVKIGGQVKEALLDTGADDTVFEEMNLPGRWKPRMIGGIGGFVVKVRQYDQVPIEICGHKVIG  
PVLVGPTPLNVIGRNLMTQIGCTLNF

>116529\_7 200.0  
PQITLWQRPVIVTVKIGGQVKEALLDTGADDTVFEEMNLPGRWKPRMIGGIGGFVVKVRQYDQVPIEICGHKVIG  
PVLVGPTPLNVIGRNLMTQMGCTLNF

>116529\_8 200.0  
PQITLWQRPVIVTVKIGGQVKEALLDTGADDTVFEEMNLPGRWTPKMIGGIGGFVVKVRQYDQPIEICGHKVIGP  
VLVGPTPLNVIGRNLMTQIGCTLNF

>116529\_9 200.0  
PQITLWQRPVIVTVKIGGQVKEALLDTGADDTVFEEMNLPGRWTPKMIGGIGGFVVKVRQYDQPIEICGHKVIGP  
VLVGPTPLNVIGRNLMTQMGCTLNF

>116529\_10 200.0  
PQITLWQRPVIVTVKIGGQVKEALLDTGADDTVFEEMNLPGRWTPKMIGGIGGFVVKVRQYDQVPIEICGHKVIG  
PVLVGPTPLNVIGRNLMTQIGCTLNF

>116529\_11 200.0  
PQITLWQRPVIVTVKIGGQVKEALLDTGADDTVFEEMNLPGRWTPKMIGGIGGFVVKVRQYDQVPIEICGHKVIG  
PVLVGPTPLNVIGRNLMTQMGCTLNF

>116529\_12 200.0  
PQITLWQRPIVTVKIGGQVKEALLDTGADDTVFEEMNLPGRWTPRMIGGIGGFVKVRQYDQIPIEICGHKVI  
VLVGPTPLNVIGRNLMTQIGCTLNF

>116529\_13 200.0  
PQITLWQRPIVTVKIGGQVKEALLDTGADDTVFEEMNLPGRWTPRMIGGIGGFVKVRQYDQIPIEICGHKVI  
VLVGPTPLNVIGRNLMTQMGCTLNF

>116529\_14 200.0  
PQITLWQRPIVTVKIGGQVKEALLDTGADDTVFEEMNLPGRWTPRMIGGIGGFVKVRQYDQVPIEICGHKVI  
PVLVGPTPLNVIGRNLMTQIGCTLNF

>116529\_15 200.0  
PQITLWQRPIVTVKIGGQVKEALLDTGADDTVFEEMNLPGRWTPRMIGGIGGFVKVRQYDQVPIEICGHKVI  
PVLVGPTPLNVIGRNLMTQMGCTLNF

>116529\_16 200.0  
PQITLWQRPIVTVKVGQVKEALLDTGADDTVFEEMNLPGRWPKMIGGIGGFVKVRQYDQIPIEICGHKVI  
PVLVGPTPLNVIGRNLMTQIGCTLNF

>116529\_17 200.0  
PQITLWQRPIVTVKVGQVKEALLDTGADDTVFEEMNLPGRWPKMIGGIGGFVKVRQYDQIPIEICGHKVI  
PVLVGPTPLNVIGRNLMTQMGCTLNF

>116529\_18 200.0  
PQITLWQRPIVTVKVGQVKEALLDTGADDTVFEEMNLPGRWPKMIGGIGGFVKVRQYDQVPIEICGHKVI  
PVLVGPTPLNVIGRNLMTQIGCTLNF

>116529\_19 200.0  
PQITLWQRPIVTVKVGQVKEALLDTGADDTVFEEMNLPGRWPKMIGGIGGFVKVRQYDQVPIEICGHKVI  
PVLVGPTPLNVIGRNLMTQMGCTLNF

>116529\_20 200.0  
PQITLWQRPIVTVKVGQVKEALLDTGADDTVFEEMNLPGRWPKMIGGIGGFVKVRQYDQIPIEICGHKVI  
PVLVGPTPLNVIGRNLMTQIGCTLNF

>116529\_21 200.0  
PQITLWQRPIVTVKVGQVKEALLDTGADDTVFEEMNLPGRWPKMIGGIGGFVKVRQYDQIPIEICGHKVI  
PVLVGPTPLNVIGRNLMTQMGCTLNF

>116529\_22 200.0  
PQITLWQRPIVTVKVGQVKEALLDTGADDTVFEEMNLPGRWPKMIGGIGGFVKVRQYDQVPIEICGHKVI  
GPVLVGPTPLNVIGRNLMTQIGCTLNF

>116529\_23 200.0  
PQITLWQRPIVTVKVGQVKEALLDTGADDTVFEEMNLPGRWPKMIGGIGGFVKVRQYDQVPIEICGHKVI  
GPVLVGPTPLNVIGRNLMTQMGCTLNF

>116529\_24 200.0  
PQITLWQRPIVTVKVGQVKEALLDTGADDTVFEEMNLPGRWTPKMIGGIGGFVKVRQYDQIPIEICGHKVI  
PVLVGPTPLNVIGRNLMTQIGCTLNF

>116529\_25 200.0  
PQITLWQRPIVTVKVGQVKEALLDTGADDTVFEEMNLPGRWTPKMIGGIGGFVKVRQYDQIPIEICGHKVI  
PVLVGPTPLNVIGRNLMTQMGCTLNF

>116529\_26 200.0  
PQITLWQRPIVTVKVGQVKEALLDTGADDTVFEEMNLPGRWTPKMIGGIGGFVKVRQYDQVPIEICGHKVI  
PVLVGPTPLNVIGRNLMTQIGCTLNF

>116529\_27 200.0  
PQITLWQRPIVTVKVGQVKEALLDTGADDTVFEEMNLPGRWTPKMIGGIGGFVKVRQYDQVPIEICGHKVI  
PVLVGPTPLNVIGRNLMTQMGCTLNF

>116529\_28 200.0  
PQITLWQRPIVTVKVGQVKEALLDTGADDTVFEEMNLPGRWTPRMIGGIGGFVKVRQYDQIPIEICGHKVI  
PVLVGPTPLNVIGRNLMTQIGCTLNF

>116529\_29 200.0  
PQITLWQRPIVTVKVGQVKEALLDTGADDTVFEEMNLPGRWTPRMIGGIGGFVKVRQYDQIPIEICGHKVI  
PVLVGPTPLNVIGRNLMTQMGCTLNF

>116529\_30 200.0  
PQITLWQRPIVTVKVGQVKEALLDTGADDTVFEEMNLPGRWTPRMIGGIGGFVKVRQYDQVPIEICGHKVI  
PVLVGPTPLNVIGRNLMTQIGCTLNF

>116529\_31 200.0  
PQITLWQRPIVTVKVGQVKEALLDTGADDTVFEEMNLPGRWTPRMIGGIGGFVKVRQYDQVPIEICGHKVI  
PVLVGPTPLNVIGRNLMTQMGCTLNF

>113056\_13 200.0  
PQITLWQRPIVTVKIGQLKEALLDTGADDTVFEEMNLPGRWPKLIGGIGGFVKVREYEQVPIEVCGHKMMG  
TVLIGPTPLNVIGRNLMTQLGCTLNF

>113056\_14 200.0  
PQITLWQRPIVTVKIGGQLKEALLDTGADDTVFEEVNLPRWPKLIGGIGGFVKVREYEQVPIEVCGHTMIGT  
VLIGPTPTNVIGRNMLTQLGCTLNF

>113056\_15 200.0  
PQITLWQRPIVTVKIGGQLKEALLDTGADDTVFEEVNLPRWPKLIGGIGGFVKVREYEQVPIEVCGHTMMG  
TVLIGPTPTNVIGRNMLTQLGCTLNF

>113056\_16 200.0  
PQITLWQRPIVTVKIGGQLKEALLDTGADDTVFDEMNLPRWPKLIGGIGGFVKVREYEQVPIEICGHKMIGT  
VLIGPTPTNVIGRNMLTQLGCTLNF

>113056\_17 200.0  
PQITLWQRPIVTVKIGGQLKEALLDTGADDTVFDEMNLPRWPKLIGGIGGFVKVREYEQVPIEICGHKMMG  
TVLIGPTPTNVIGRNMLTQLGCTLNF

>113056\_18 200.0  
PQITLWQRPIVTVKIGGQLKEALLDTGADDTVFDEMNLPRWPKLIGGIGGFVKVREYEQVPIEICGHTMIGT  
VLIGPTPTNVIGRNMLTQLGCTLNF

>113056\_19 200.0  
PQITLWQRPIVTVKIGGQLKEALLDTGADDTVFDEMNLPRWPKLIGGIGGFVKVREYEQVPIEICGHTMMG  
TVLIGPTPTNVIGRNMLTQLGCTLNF

>113056\_20 200.0  
PQITLWQRPIVTVKIGGQLKEALLDTGADDTVFDEMNLPRWPKLIGGIGGFVKVREYEQVPIEVCGHKMIG  
TVLIGPTPTNVIGRNMLTQLGCTLNF

>113056\_21 200.0  
PQITLWQRPIVTVKIGGQLKEALLDTGADDTVFDEMNLPRWPKLIGGIGGFVKVREYEQVPIEVCGHKMM  
GTVLIGPTPTNVIGRNMLTQLGCTLNF

>113056\_22 200.0  
PQITLWQRPIVTVKIGGQLKEALLDTGADDTVFDEMNLPRWPKLIGGIGGFVKVREYEQVPIEVCGHTMIG  
TVLIGPTPTNVIGRNMLTQLGCTLNF

>113056\_23 200.0  
PQITLWQRPIVTVKIGGQLKEALLDTGADDTVFDEMNLPRWPKLIGGIGGFVKVREYEQVPIEVCGHTMM  
GTVLIGPTPTNVIGRNMLTQLGCTLNF

>113056\_24 200.0  
PQITLWQRPIVTVKIGGQLKEALLDTGADDTVFDEVNLPGRWPKLIGGIGGFVKVREYEQVPIEICGHKMIGT  
VLIGPTPTNVIGRNMLTQLGCTLNF

>113056\_25 200.0  
PQITLWQRPIVTVKIGGQLKEALLDTGADDTVFDEVNLPGRWPKLIGGIGGFVKVREYEQVPIEICGHKMMG  
TVLIGPTPTNVIGRNMLTQLGCTLNF

>113056\_26 200.0  
PQITLWQRPIVTVKIGGQLKEALLDTGADDTVFDEVNLPGRWPKLIGGIGGFVKVREYEQVPIEICGHTMIGT  
VLIGPTPTNVIGRNMLTQLGCTLNF

>113056\_27 200.0  
PQITLWQRPIVTVKIGGQLKEALLDTGADDTVFDEVNLPGRWPKLIGGIGGFVKVREYEQVPIEICGHTMMG  
TVLIGPTPTNVIGRNMLTQLGCTLNF

>113056\_28 200.0  
PQITLWQRPIVTVKIGGQLKEALLDTGADDTVFDEVNLPGRWPKLIGGIGGFVKVREYEQVPIEVCGHKMIG  
TVLIGPTPTNVIGRNMLTQLGCTLNF

>113056\_29 200.0  
PQITLWQRPIVTVKIGGQLKEALLDTGADDTVFDEVNLPGRWPKLIGGIGGFVKVREYEQVPIEVCGHKMM  
GTVLIGPTPTNVIGRNMLTQLGCTLNF

>113056\_30 200.0  
PQITLWQRPIVTVKIGGQLKEALLDTGADDTVFDEVNLPGRWPKLIGGIGGFVKVREYEQVPIEVCGHTMIG  
TVLIGPTPTNVIGRNMLTQLGCTLNF

>113056\_31 200.0  
PQITLWQRPIVTVKIGGQLKEALLDTGADDTVFDEVNLPGRWPKLIGGIGGFVKVREYEQVPIEVCGHTMMG  
TVLIGPTPTNVIGRNMLTQLGCTLNF

>113056\_32 200.0  
PQITLWQRPVVTVKIGGQLKEALLDTGADDTVFEEMNLPRWPKLIGGIGGFVKVREYEQVPIEICGHKMIG  
TVLIGPTPTNVIGRNMLTQLGCTLNF

>113056\_33 200.0  
PQITLWQRPVVTVKIGGQLKEALLDTGADDTVFEEMNLPRWPKLIGGIGGFVKVREYEQVPIEICGHKMM  
GTVLIGPTPTNVIGRNMLTQLGCTLNF

>113056\_34 200.0  
PQITLWQRPVVTVKIGGQLKEALLDTGADDTVFEEMNLPRWPKLIGGIGGFVKVREYEQVPIEICGHTMIG  
TVLIGPTPTNVIGRNMLTQLGCTLNF

>113056\_35 200.0  
PQITLWQRPVVTVKIGGQLKEALLDTGADDTVFEEMNLPGRWPKLIGGIGGFVKVREYEQVPIEICGHTMM  
GTVLIGPTPTNVIGRNMLTQLGCTLNF  
>113056\_36 200.0  
PQITLWQRPVVTVKIGGQLKEALLDTGADDTVFEEMNLPGRWPKLIGGIGGFVKVREYEQVPIEVCGHKMIG  
TVLIGPTPTNVIGRNMLTQLGCTLNF  
>113056\_37 200.0  
PQITLWQRPVVTVKIGGQLKEALLDTGADDTVFEEMNLPGRWPKLIGGIGGFVKVREYEQVPIEVCGHKMM  
GTVLIGPTPTNVIGRNMLTQLGCTLNF  
>113056\_38 200.0  
PQITLWQRPVVTVKIGGQLKEALLDTGADDTVFEEMNLPGRWPKLIGGIGGFVKVREYEQVPIEVCGHTMIG  
TVLIGPTPTNVIGRNMLTQLGCTLNF  
>113056\_39 200.0  
PQITLWQRPVVTVKIGGQLKEALLDTGADDTVFEEMNLPGRWPKLIGGIGGFVKVREYEQVPIEVCGHTMM  
GTVLIGPTPTNVIGRNMLTQLGCTLNF  
>113056\_40 200.0  
PQITLWQRPVVTVKIGGQLKEALLDTGADDTVFEENVLPGRWPKLIGGIGGFVKVREYEQVPIECGHKMIG  
TVLIGPTPTNVIGRNMLTQLGCTLNF  
>113056\_41 200.0  
PQITLWQRPVVTVKIGGQLKEALLDTGADDTVFEENVLPGRWPKLIGGIGGFVKVREYEQVPIECGHKMMG  
TVLIGPTPTNVIGRNMLTQLGCTLNF  
>113056\_42 200.0  
PQITLWQRPVVTVKIGGQLKEALLDTGADDTVFEENVLPGRWPKLIGGIGGFVKVREYEQVPIECGHTMIG  
VLIGPTPTNVIGRNMLTQLGCTLNF  
>113056\_43 200.0  
PQITLWQRPVVTVKIGGQLKEALLDTGADDTVFEENVLPGRWPKLIGGIGGFVKVREYEQVPIECGHTMMG  
TVLIGPTPTNVIGRNMLTQLGCTLNF  
>113056\_44 200.0  
PQITLWQRPVVTVKIGGQLKEALLDTGADDTVFEENVLPGRWPKLIGGIGGFVKVREYEQVPIEVCGHKMIG  
TVLIGPTPTNVIGRNMLTQLGCTLNF  
>113056\_45 200.0  
PQITLWQRPVVTVKIGGQLKEALLDTGADDTVFEENVLPGRWPKLIGGIGGFVKVREYEQVPIEVCGHKMM  
GTVLIGPTPTNVIGRNMLTQLGCTLNF  
>113056\_46 200.0  
PQITLWQRPVVTVKIGGQLKEALLDTGADDTVFEENVLPGRWPKLIGGIGGFVKVREYEQVPIEVCGHTMIG  
TVLIGPTPTNVIGRNMLTQLGCTLNF  
>113056\_47 200.0  
PQITLWQRPVVTVKIGGQLKEALLDTGADDTVFEENVLPGRWPKLIGGIGGFVKVREYEQVPIEVCGHTMM  
GTVLIGPTPTNVIGRNMLTQLGCTLNF  
>113056\_48 200.0  
PQITLWQRPVVTVKIGGQLKEALLDTGADTVFDEMNLPRWPKLIGGIGGFVKVREYEQVPIECGHKMIG  
TVLIGPTPTNVIGRNMLTQLGCTLNF  
>113056\_49 200.0  
PQITLWQRPVVTVKIGGQLKEALLDTGADTVFDEMNLPRWPKLIGGIGGFVKVREYEQVPIECGHKMM  
GTVLIGPTPTNVIGRNMLTQLGCTLNF  
>113056\_50 200.0  
PQITLWQRPVVTVKIGGQLKEALLDTGADTVFDEMNLPRWPKLIGGIGGFVKVREYEQVPIECGHTMIG  
TVLIGPTPTNVIGRNMLTQLGCTLNF  
>113056\_51 200.0  
PQITLWQRPVVTVKIGGQLKEALLDTGADTVFDEMNLPRWPKLIGGIGGFVKVREYEQVPIECGHTMM  
GTVLIGPTPTNVIGRNMLTQLGCTLNF  
>113056\_52 200.0  
PQITLWQRPVVTVKIGGQLKEALLDTGADTVFDEMNLPRWPKLIGGIGGFVKVREYEQVPIEVCGHKMI  
GTVLIGPTPTNVIGRNMLTQLGCTLNF  
>117069\_0 200.0  
PQITLWQRPILT VKIAGQLTEALLDTGADDTIFQDINLPGRWTPKIVGGIGLLRVRQYEQVPIEVCGHKIITTVLI  
GPTPVNVLGRNLMTQLGCTLNF  
>117069\_1 200.0  
PQITLWQRPILT VKVAGQLTEALLDTGADDTIFQDINLPGRWTPKIVGGIGLLRVRQYEQVPIEVCGHKIITTVL  
IGPTPVNVLGRNLMTQLGCTLNF

**Sequences for the TPV-susceptible ensemble**

>216623\_0 0.4

PQITLWQRPFVTIKIGGQLKEALLDTGADDTVLEEMALPGKWKPKMIGGIGGFVKVQYDQITIDICGHKATGT  
VLIGPTPVNIIGRNLLTQIGCTLNF  
>148079\_0 0.5  
PQITLWQRPIVTVRIEGLIEALLDTGADDTVLEDIDLPGNWKPKMIGGIGGFVKVRQYDQIHIEICGKRAIGSV  
VVGPTPANIIGRNILSQIGCTLNF  
>115747\_1 0.4  
PQITLWQRPIVTIKIGGQTKALLDTGADDTVLEEMNLPGRWPKMIVGIGGFVKVRQYDQILVEICGHKAIGT  
VLVGPTPANIIGRNLMTQIGCTLNF  
>115755\_0 0.2  
PQITLWQRPIVTIKVGGQIMEALIDTGADDTVLEDINLPGRWPKMIQGIGGLVKVRQYDQIPIEICGHEVMSTV  
LVGPTPANIIGRNLLTQIGCTLNF  
>115755\_1 0.2  
PQITLWQRPIVTIKVGGQIMEALIDTGADDTVLEDINLPGRWPKMIQGIGGLVKVRQYDQIPIEICGHEVMSTV  
LVGPTPANIIGRNLLTQMGCTLNF  
>115755\_2 0.2  
PQITLWQRPIVTIKVGGQIMEALIDTGADDTVLEDINLPGRWPKMIQGIGGLVKVRQYDQIPIEICGHEVMSTIL  
VGPPTPANIIGRNLLTQIGCTLNF  
>115755\_3 0.2  
PQITLWQRPIVTIKVGGQIMEALIDTGADDTVLEDINLPGRWPKMIQGIGGLVKVRQYDQIPIEICGHEVMSTIL  
VGPPTPANIIGRNLLTQMGCTLNF  
>117023\_0 0.4  
PQITLWQRPIVTIKIGGQLREALLDTGADDTVLEDIELPGRWPKMIVGVGGFAKVRQYDQVPIEICGHKVVGT  
VLVGPTPANIIGRNLMTQLGCTLNF  
>117023\_1 0.4  
PQITLWQRPIVTIKIGGQLREALLDTGADDTVLEDIELPGRWPKMIVGVGGFAKVKYDQVPIEICGHKVVGT  
VLVGPTPANIIGRNLMTQLGCTLNF  
>147548\_0 0.2  
PQITLWQRPIVTIKIGGQLKEALLDTGADDTVLEDINLPGRWPKMIVGVGGFVKVRQYDQVAIEICGHKVIKT  
VLVGPTPTNIIGRNLLTQIGCTLNF  
>75088\_0 0.4  
PQITLWQRPIVTIKIGGQLKEALLDTGADDTVLEEMNLPGRWPKMIVGVGGFSKVRQYDQVPIEICGHKVVG  
SVLIGPTPANIIGRNLLTQLGCTLNF  
>75088\_1 0.4  
PQITLWQRPIVTIKIGGQLKEALLDTGADDTVLEEMNLPGRWPKIIVGVGGFSKVRQYDQVPIEICGHKVVGS  
VLIGPTPANIIGRNLLTQLGCTLNF  
>75088\_2 0.4  
PQITLWQRPIVTIKIGGQLKEALLDTGADDTVLEEMNLPGRWPKVIVGVGGFSKVRQYDQVPIEICGHKVVG  
SVLIGPTPANIIGRNLLTQLGCTLNF  
>75088\_3 0.4  
PQITLWQRPIVTIKIGGQLKEALLDTGADDTVLEEMNLPGRWPKMIVGVGGFSKVRQYDQVPIEICGHKVVG  
SVLIGPTPANIIGRNLLTQLGCTLNF  
>75088\_4 0.4  
PQITLWQRPIVTIKIGGQLKEALLDTGADDTVLEEMNLPGRWPKIIVGVGGFSKVRQYDQVPIEICGHKVVGS  
VLIGPTPANIIGRNLLTQLGCTLNF  
>75088\_5 0.4  
PQITLWQRPIVTIKIGGQLKEALLDTGADDTVLEEMNLPGRWPKVIVGVGGFSKVRQYDQVPIEICGHKVVG  
SVLIGPTPANIIGRNLLTQLGCTLNF  
>148003\_4 0.5  
PQITLWQRPLVTIKIGGQLIEALLDTGADDTVLEEMDLPKWKPKMIGGIGGFVKVRQYEQVPIEICGYKAEGTV  
LVGPTPVNIIGRNLLTQIGCTLNF  
>148003\_5 0.5  
PQITLWQRPLVTIKIGGQLIEALLDTGADDTVLEEMDLPKWKPKMIGGIGGFVKVRQYEQVPLEICGYKAEGT  
VLVGPTPVNIIGRNLLTQIGCTLNF  
>148003\_6 0.5  
PQITLWQRPLVTIKIGGQLIEALLDTGADDTVLEEDIDLPGKWKPKMIGGIGGFVKVRQYEQVPIEICGYKAEGTVL  
VGPPTPVNIIGRNLLTQIGCTLNF  
>235707\_18 0.5  
PQITLWQRPLVAIKIGGQLKEALLDTGADDTVLEEMNLPGRWPKMIGGIGGFVKVQYDQVAIEICGHKAIGT  
VLVGPTPVNIIGRNLLTQLGCTLNF  
>116519\_0 0.3  
PQIPLWQRPFVTIKIGGQIKEALLDTGADDTVLEEMDLPGRWPKIIGGIGGFLKVRQYDQIPIEICGHKILGTVL  
IGPTPVNIIGRGLMTQLGCTLNF  
>116519\_1 0.3

PQIPLWQRPFVTIKIGGHIKEALLDTGADDTVFQEMDLPGRWPKIIGGIGGFLKVRQYDQIPIEICGHKILGTVL  
IGPTPVNIIGRGLMTQLGCTLNF  
>117057\_0 0.4  
PQIPLWQRPFVTIKIGGQIKEALLDTGADDTVFQEMDLPGRWPKIIGGIGGFLKVRQYDQIPIEICGHKIIIGTVLI  
GPTPVNIIGRGLMTQLGCTLNF  
>117057\_2 0.4  
PQIPLWQRPFVTIKIGGHIKEALLDTGADDTVFQEMDLPGRWPKIIGGIGGFLKVRQYDQIPIEICGHKIIIGTVLI  
GPTPVNIIGRGLMTQLGCTLNF  
>115747\_0 0.4  
PQITLWQRPIVTIKIGGQIKEALLDTGADDTVLEEMNLPGRWPKMIVGIGGFVKVRQYDQILVEICGHKAIGTV  
LVGPTPANIIGRNLMQTIGCTLNF  
>117139\_0 0.2  
PQITLWQRPIVTIKIGGQLKEALLDTGADDTVLEEMDLPGRWPKMIVGIGGLVKVRQYDQIPIEICGHKTIGTV  
LIGPTPANIIGRNLMQTIGCTLNF  
>216607\_0 0.4  
PQITLWQRPLVTIKIGGQLKEALLDTGADDTVLEEMNLPGRWPKPRMIGGIGGFIKVGQYDQMPIEICGHKTEG  
TVLVGPTPVNIIGRNLLTQIGCTLNF  
>216607\_1 0.4  
PQITLWQRPLVTIKIGGQLKEALLDTGADDTVLEEMNLPGRWPKPRMIGGIGGFIKVGQYDQMPIEICGHKTEG  
TVLVGPTPVNIIGRNLLTQMGCTLNF  
>216607\_2 0.4  
PQITLWQRPLVTIKIGGQLKEALLDTGADDTVLEEINLPGRWPKPRMIGGIGGFIKVGQYDQMPIEICGHKTEG  
VLVGPPTVNIIGRNLLTQIGCTLNF  
>216607\_3 0.4  
PQITLWQRPLVTIKIGGQLKEALLDTGADDTVLEEINLPGRWPKPRMIGGIGGFIKVGQYDQMPIEICGHKTEG  
VLVGPPTVNIIGRNLLTQMGCTLNF  
>81903\_0 0.3  
PQITLWQRPFVTIKVGGQLIEALLDTGADDTVLEEINLPGRWTPKIIGGVGGLIKVRQYEQVPIEICGHKVIGPVL  
VGPTPVNIIGRNLMQTIGCTLNF  
>81903\_1 0.3  
PQITLWQRPFVTIKVGGQLIEALLDTGADDTVLEEINLPGRWTPKIIGGVGGLKVRQYEQVPIEICGHKVIGPV  
LVGPTPVNIIGRNLMQTIGCTLNF  
>109470\_1 0.4  
PQITLWQRPLVTIKIGGQLKEALLDTGADDTVLEEMNLPGRWPKMIEGIGGFIKVRQYDEISIDICGHKAVGTV  
LIGPTPVNIIGRNLLTQIGCTLNF  
>109470\_3 0.4  
PQITLWQRPLVTIKIGGQLKEALLDTGADDTVLEEMSLPGRWPKMIEGIGGFIKVRQYDEISIDICGHKAVGTV  
LIGPTPVNIIGRNLLTQIGCTLNF  
>81909\_0 0.4  
PQITLWQRPLVTIKIGGQLIEALLDTGADDTILEEINLPGRWPKMIGGIGGFLKVRQYDQIPIEICGHKVIGTVLV  
GPTPTNIIGRNIMTQIGCTLNF  
>81909\_1 0.4  
PQITLWQRPLVTIKIGGQLIEALLDTGADDTILEEINLPGRWPKMIGGIGGFLKVRQYDQIPIEICGHKVIGTVLV  
GPTPTNIIGRNMMTQIGCTLNF  
>116920\_3 0.4  
PQITLWQRPLVTIKIGGQLKEALLDTGADDTVLEEMNLPGRWPKPRMIGGLGGFIKVRQYDQVPIEICGHKTVS  
TVLIGPTPANIIGRNLLTQLGCTLNF  
>235707\_6 0.5  
PQITLWQRPLVTIKIGGQLKEALLDTGADDTVLEEMNLPGRWPKMIGGIGGFIKVGQYDQVAIEICGHKAIGT  
VLVGPPTVNIIGRNLLTQLGCTLNF  
>235707\_7 0.5  
PQITLWQRPLVTIKIGGQLKEALLDTGADDTVLEEMNLPGRWPKMIGGIGGFIKVGQYDQVAIEICGHKAIGT  
VLIGPTPVNIIGRNLLTQLGCTLNF  
>235707\_24 0.5  
PQITLWQRPIVTIKIGGQLKEALLDTGADDTVLEEMNLPGRWPKMIGGIGGFIKVGQYDQIAIEICGHKAIGTV  
LVGPTPVNIIGRNLLTQLGCTLNF  
>235707\_25 0.5  
PQITLWQRPIVTIKIGGQLKEALLDTGADDTVLEEMNLPGRWPKMIGGIGGFIKVGQYDQIAIEICGHKAIGTV  
LIGPTPVNIIGRNLLTQLGCTLNF  
>235707\_30 0.5  
PQITLWQRPIVTIKIGGQLKEALLDTGADDTVLEEMNLPGRWPKMIGGIGGFIKVGQYDQVAIEICGHKAIGTV  
LVGPTPVNIIGRNLLTQLGCTLNF  
>235707\_31 0.5

PQITLWQRPIVTIKIGGQLKEALLDTGADDTVLEEMNLPGRWPKMIGGIGGFIVKQYDQVAIEICGHKAIGTV  
LIGPTPVNIIGRNLLTQLGCTLNF  
>235707\_2 0.5  
PQITLWQRPLVTIKIGGQLKEALLDTGADDTVLEEMNLPGRWPKMIGGIGGFIVKQYDQISIEICGHKAIGTV  
LVGPTPVNIIGRNLLTQLGCTLNF  
>257931\_3 0.5  
PQITLWQRPFVTVKIGGQLKEALLDTGADNTVIEDISLPGRWPKQMIGGIGGFVVKVQYEQVSVEICGHKAMG  
TVLVGPTPVNIIGRNLLTKIGCTLNF  
>257931\_4 0.5  
PQITLWQRPFVTVKIGGQLKEALLDTGADNTVIEDISLPGRWPKQIIGGIGGFVVKVQYEQVSVEICGHKAIGT  
VLVGPVNIIGRNLLTQIGCTLNF  
>257931\_5 0.5  
PQITLWQRPFVTVKIGGQLKEALLDTGADNTVIEDISLPGRWPKQIIGGIGGFVVKVQYEQVSVEICGHKAIGT  
VLVGPVNIIGRNLLTKIGCTLNF  
>257931\_6 0.5  
PQITLWQRPFVTVKIGGQLKEALLDTGADNTVIEDISLPGRWPKQIIGGIGGFVVKVQYEQVSVEICGHKAMG  
TVLVGPTPVNIIGRNLLTQIGCTLNF  
>257931\_7 0.5  
PQITLWQRPFVTVKIGGQLKEALLDTGADNTVIEDISLPGRWPKQIIGGIGGFVVKVQYEQVSVEICGHKAMG  
TVLVGPTPVNIIGRNLLTKIGCTLNF  
>257931\_8 0.5  
PQITLWQRPFVTVKIGGQLKEALIDTGADNTVIEDISLPGRWPKQMIGGIGGFVVKVQYEQVSVEICGHKAIGT  
VLVGPVNIIGRNLLTQIGCTLNF  
>257931\_9 0.5  
PQITLWQRPFVTVKIGGQLKEALIDTGADNTVIEDISLPGRWPKQMIGGIGGFVVKVQYEQVSVEICGHKAIGT  
VLVGPVNIIGRNLLTKIGCTLNF  
>257931\_10 0.5  
PQITLWQRPFVTVKIGGQLKEALIDTGADNTVIEDISLPGRWPKQMIGGIGGFVVKVQYEQVSVEICGHKAMG  
TVLVGPTPVNIIGRNLLTQIGCTLNF  
>187121\_4 0.4  
PQITLWQRPLVTIKIGGHLKGALLDTGADDTVLEEMSLPGRWPKMIGGIGGFIVKQYDQIPIEICGHKAIGTV  
LVGPTPVNIIGRNLLTQIGCTLNF  
>187121\_5 0.4  
PQITLWQRPLVTIKIGGHLKGALLDTGADDTVLEEMSLPGRWPKMIGGIGGFIVKQYDQIPIEICGHKAIGTV  
LIGPTPVNIIGRNLLTQIGCTLNF  
>187121\_6 0.4  
PQITLWQRPLVTIKIGGHLKGALLDTGADDTVLEEMSLPGRWRPKMIGGIGGFIVKQYDQIPIEICGHKAIGTV  
LVGPTPVNIIGRNLLTQIGCTLNF  
>187121\_7 0.4  
PQITLWQRPLVTIKIGGHLKGALLDTGADDTVLEEMSLPGRWRPKMIGGIGGFIVKQYDQIPIEICGHKAIGTV  
LIGPTPVNIIGRNLLTQIGCTLNF  
>187121\_12 0.4  
PQITLWQRPLVTIKVGGHLKGALLDTGADDTVLEEMSLPGRWPKMIGGIGGFIVKQYDQIPIEICGHKAIGT  
VLVGPVNIIGRNLLTQIGCTLNF  
>187121\_13 0.4  
PQITLWQRPLVTIKVGGHLKGALLDTGADDTVLEEMSLPGRWPKMIGGIGGFIVKQYDQIPIEICGHKAIGT  
VLIGPTPVNIIGRNLLTQIGCTLNF  
>187121\_14 0.4  
PQITLWQRPLVTIKVGGHLKGALLDTGADDTVLEEMSLPGRWRPKMIGGIGGFIVKQYDQIPIEICGHKAIGT  
VLVGPVNIIGRNLLTQIGCTLNF  
>187121\_15 0.4  
PQITLWQRPLVTIKVGGHLKGALLDTGADDTVLEEMSLPGRWRPKMIGGIGGFIVKQYDQIPIEICGHKAIGT  
VLIGPTPVNIIGRNLLTQIGCTLNF  
>116920\_1 0.4  
PQITLWQRPLVTIKIGGQLKEALLDTGADDTVLEEMNLPGRWPKPRMIGGLGGFIVRQYDQVPIEICGHKIVST  
VLIGPTPANIIGRNLLTQLGCTLNF  
>143459\_0 0.2  
PQITLWQRPIVTIKIGGQLKEALLDTGADNTVFEEMNLPGRWPKLIGGIGGLLKVREYDQIPIEICGHKTISTVL  
IGPTPVNIIGRDLLTQIGCTLNF  
>257929\_0 0.4  
PQITLWQRPLVTIKVGGQLKEALLDTGADDTVLEEMNLQGRWPKMIGGIGGFIVKQYDQIPVEICGHKAIG  
TVLVGPTPVNIIGRNLLTQIGCTLNF  
>81801\_0 0.3

PQITLWQRPLVTIKIGGQLREALDGTGADDTVLEDIDLPGRWKPKMIGGIGGLIKVRQYDQPIEICGKKTGTV  
LIGPTPANIIGNLLTQIGCTLNF  
>116920\_2 0.4  
PQITLWQRPLVTIKIGGQLKEALLDGTGADDTVLEEMNLPGRWKPRMIGGLGGFIKVRQYDQVPIEICGHKTG  
TVLIGPTPANIIGNLLTQIGCTLNF  
>143336\_2 0.5  
PQITLWQRPLVTIKIGGQLKEALLDGTGADDTVLEEMNLPGRWKPKMIGGIGGFIKVRQYDQVPIEICGHKVICT  
VLIGPTPVNIIGNLMTQLGCTLNF  
>143336\_6 0.5  
PQITLWQRPLVTIKIGGQLKEALLDGTGADDTVLEEMNLPGRWKPKMIGGLGGFIKVRQYDQVPIEICGHKVICT  
VLIGPTPVNIIGNLMTQLGCTLNF  
>143336\_10 0.5  
PQITLWQRPLVTIKIGGQLKEALLDGTGADDTILEEMNLPGRWKPKMIGGIGGFIKVRQYDQVPIEICGHKVICTV  
LIGPTPVNIIGNLMTQLGCTLNF  
>143336\_14 0.5  
PQITLWQRPLVTIKIGGQLKEALLDGTGADDTILEEMNLPGRWKPKMIGGLGGFIKVRQYDQVPIEICGHKVICTV  
LIGPTPVNIIGNLMTQLGCTLNF  
>143336\_18 0.5  
PQITLWQRPLVTIKIGGQLKEAILDGTGADDTVLEEMNLPGRWKPKMIGGIGGFIKVRQYDQVPIEICGHKVICTV  
LIGPTPVNIIGNLMTQLGCTLNF  
>143336\_22 0.5  
PQITLWQRPLVTIKIGGQLKEAILDGTGADDTVLEEMNLPGRWKPKMIGGLGGFIKVRQYDQVPIEICGHKVICT  
VLIGPTPVNIIGNLMTQLGCTLNF  
>143336\_26 0.5  
PQITLWQRPLVTIKIGGQLKEAILDGTGADDTILEEMNLPGRWKPKMIGGIGGFIKVRQYDQVPIEICGHKVICTV  
LIGPTPVNIIGNLMTQLGCTLNF  
>143336\_0 0.5  
PQITLWQRPLVTIKIGGQLKEALLDGTGADDTVLEEMNLPGRWKPKMIGGIGGFIKVRQYDQVPIEICGHKAICT  
VLIGPTPVNIIGNLMTQLGCTLNF  
>143336\_4 0.5  
PQITLWQRPLVTIKIGGQLKEALLDGTGADDTVLEEMNLPGRWKPKMIGGLGGFIKVRQYDQVPIEICGHKAICT  
VLIGPTPVNIIGNLMTQLGCTLNF  
>143336\_8 0.5  
PQITLWQRPLVTIKIGGQLKEALLDGTGADDTILEEMNLPGRWKPKMIGGIGGFIKVRQYDQVPIEICGHKAICTV  
LIGPTPVNIIGNLMTQLGCTLNF  
>143336\_12 0.5  
PQITLWQRPLVTIKIGGQLKEALLDGTGADDTILEEMNLPGRWKPKMIGGLGGFIKVRQYDQVPIEICGHKAICTV  
LIGPTPVNIIGNLMTQLGCTLNF  
>143336\_16 0.5  
PQITLWQRPLVTIKIGGQLKEAILDGTGADDTVLEEMNLPGRWKPKMIGGIGGFIKVRQYDQVPIEICGHKAICTV  
LIGPTPVNIIGNLMTQLGCTLNF  
>143336\_20 0.5  
PQITLWQRPLVTIKIGGQLKEAILDGTGADDTVLEEMNLPGRWKPKMIGGLGGFIKVRQYDQVPIEICGHKAICT  
VLIGPTPVNIIGNLMTQLGCTLNF  
>143336\_24 0.5  
PQITLWQRPLVTIKIGGQLKEAILDGTGADDTILEEMNLPGRWKPKMIGGIGGFIKVRQYDQVPIEICGHKAICTV  
LIGPTPVNIIGNLMTQLGCTLNF  
>143336\_28 0.5  
PQITLWQRPLVTIKIGGQLKEAILDGTGADDTILEEMNLPGRWKPKMIGGLGGFIKVRQYDQVPIEICGHKAICTV  
LIGPTPVNIIGNLMTQLGCTLNF  
>109484\_0 0.4  
PQITLWQRPLVTIKIGGQLKEALLDGTGADDTVLEEMNLPGRWKPKMIGGIGGFIKVRQYDQPIEICGHKATGT  
VLIGPTPVNIIGNLLTQIGCTLNF  
>198533\_0 0.5  
PQITLWQRPLVTIKIGGQLKEALLDGTGADDTVLEEMELPGRWKPKMIGGIGGFIKVRQYDQPIEICGHHTARGT  
VLGPTPVNIIGNLLTQIGCTLNF  
>216639\_0 0.5  
PQITLWQRPIVTIKIGGQIKEALLDGTGADDTVLEEITLPGKWKPKMIGGIGGFIKVGQYDQMPMEICGHKVIGTV  
LVGPTPVNIIGNLLTQIGCTLNF  
>216639\_1 0.5  
PQITLWQRPIVTIKIGGQIKEALLDGTGADDTVLEEITLPGKWKPRMIGGIGGFIKVGQYDQMPMEICGHKVIGTV  
LVGPTPVNIIGNLLTQIGCTLNF  
>216639\_2 0.5



PQITLWQRPVVTIKIGGQIKEALLDTGADDTVLEEITLPGKWKPKMIGGIGGFIKVGQYDQMPMEICGHKVI  
VLVGPTPVNIIGRNLLTQLGCTLNF  
>216639\_3 0.5  
PQITLWQRPVVTIKIGGQIKEALLDTGADDTVLEEITLPGKWKPRMIGGIGGFIKVGQYDQMPMEICGHKVI  
VLVGPTPVNIIGRNLLTQLGCTLNF  
>145683\_0 0.5  
PQITLWQRPIVTIKIGGQLKEALLDTGADDTVLEEMNLPGRWKPKMIGGIGGFIKVRQYDQIAIEICGHKAIGTV  
LVGPTPVNIIGRNLLTQLGCTLNF  
>145683\_1 0.5  
PQITLWQRPIVTIKIGGQLKEALLDTGADDTVLEEINLPGRWKPKMIGGIGGFIKVRQYDQIAIEICGHKAIGTV  
VGPTPVNIIGRNLLTQLGCTLNF  
>109470\_0 0.4  
PQITLWQRPLVTIKIGGQLKEALLDTGADDTVLEEMNLPGRWKPKMIGGIGGFIKVRQYDEISIDICGHKAVGT  
VLIGPTPVNIIGRNLLTQIGCTLNF  
>109470\_2 0.4  
PQITLWQRPLVTIKIGGQLKEALLDTGADDTVLEEMSLPGRWKPKMIGGIGGFIKVRQYDEISIDICGHKAVGT  
LIGPTPVNIIGRNLLTQIGCTLNF  
>148059\_0 0.4  
PQITLWQRPLVTIKIGGQLKEALLDTGADDTVLEEMNLPGRWKPKMIGGIGGFIKVKQYDQIQIEICGHKAIGTV  
LVGPTPVNIIGRNLLTQIGCTLNF  
>148111\_0 0.4  
PQITLWQRPLVTIKIGGQLKEALLDTGADDTVLEEMNLPGRWKPRMIGGIGGFIKVRQYDQISMEICGHKAIG  
TVLIGPTPVNIIGRNLLTQIGCTLNF  
>148111\_1 0.4  
PQITLWQRPLVTIKIGGQLKEALLDTGADDTVLEEMNLPGRWKPRMIGGIGGFIKVRQYDQVSMEICGHKAIG  
TVLIGPTPVNIIGRNLLTQIGCTLNF  
>172116\_0 0.3  
PQITLWQRPVVTIKIGGQLKEALLDTGADDTVLEDMDLPGRWKPKIIGGIGGFIKVRQYDQIPIEICGHKVISTVL  
IGPTPVNIIGRNLLTQLGCTLNF  
>172116\_1 0.3  
PQITLWQRPVVTIKIGGQLKEALLDTGADDTVLEDMDLPGRWKPKIIGGIGGFIRVRQYDQIPIEICGHKVISTVL  
IGPTPVNIIGRNLLTQLGCTLNF  
>116920\_0 0.4  
PQITLWQRPLVTIKIGGQLKEALLDTGADDTVLEEMNLPGRWKPRMIGGLGGFIKVRQYDQVPIEICGHKIVGT  
VLIGPTPANIIGRNLLTQLGCTLNF  
>75096\_0 0.4  
PQITLWQRPLVTIKIGGQLKEALLDTGADDTILEEMNLPGRWKPKMVGGIGGFIKVRQYDEIPIEICGHKAIGTV  
LVGPTPANIIGRNLLTQLGCTLNF  
>81869\_0 0.4  
PQITLWQRPIVTIKIGGQLKEALIDTGADDTVLEEMNLPGRWKPKMIGGIGGFIKVRQYDQIPVEICGHKALGT  
LIGPTPANIIGRNLLTQIGCTLNF  
>109408\_0 0.5  
PQITLWQRPLVTIKIGGQLKEALLDTGADNTVLEEMNLPGRWKPKMIGGIGGFIKVRQYDQIPIEICGHRTIGT  
VLIGPTPVNIIGRDLLTQIGCTLNF  
>109408\_1 0.5  
PQITLWQRPIVTIKIGGQLKEALLDTGADNTVLEEMNLPGRWKPKMIGGIGGFIKVRQYDQIPIEICGHRTIGTV  
LIGPTPVNIIGRDLLTQIGCTLNF
